# Supplementary material for: Internet-based cognitive–behavioural therapy for tinnitus: secondary analysis to examine predictors of outcomes
Source: PubMed Central journal article supplement — BMJ Open. 2021 Aug 20;11(8):e049384. doi: 10.1136/bmjopen-2021-049384 (PMC8381319; doi:10.1136/bmjopen-2021-049384), 2021-08-20
Supplement: bmjopen-2021-049384.draft_revisions.pdf [file bmjopen-2021-049384.draft_revisions.pdf]

# BMJ Open

BMJ Open is committed to open peer review. As part of this commitment we make the peer review history of every article we publish publicly available.

When an article is published we post the peer reviewers' comments and the authors' responses online. We also post the versions of the paper that were used during peer review. These are the versions that the peer review comments apply to.

The versions of the paper that follow are the versions that were submitted during the peer review process. They are not the versions of record or the final published versions. They should not be cited or distributed as the published version of this manuscript.

BMJ Open is an open access journal and the full, final, typeset and author-corrected version of record of the manuscript is available on our site with no access controls, subscription charges or pay-per-view fees (<http://bmjopen.bmj.com>).

If you have any questions on BMJ Open's open peer review process please email [info.bmjopen@bmj.com](mailto:info.bmjopen@bmj.com)

# BMJ Open

## Predictors of outcomes of internet-based cognitive behavioral therapy intervention for individuals with tinnitus

|                               |                                                                                                                                                                                                                                                                                                                                                                                                                            |
|-------------------------------|----------------------------------------------------------------------------------------------------------------------------------------------------------------------------------------------------------------------------------------------------------------------------------------------------------------------------------------------------------------------------------------------------------------------------|
| Journal:                      | <i>BMJ Open</i>                                                                                                                                                                                                                                                                                                                                                                                                            |
| Manuscript ID                 | bmjopen-2021-049384                                                                                                                                                                                                                                                                                                                                                                                                        |
| Article Type:                 | Original research                                                                                                                                                                                                                                                                                                                                                                                                          |
| Date Submitted by the Author: | 26-Jan-2021                                                                                                                                                                                                                                                                                                                                                                                                                |
| Complete List of Authors:     | Rodrigo, Hansapani; The University of Texas Rio Grande Valley, School of Mathematical and Statistical Sciences<br>Beukes, Eldré; Lamar University, Department of Speech and Hearing Sciences; Anglia Ruskin University, Department of Speech<br>Andersson, Gerhard; Linköping University, Department of Behavioral Sciences and Learning<br>Manchaiah, Vinaya; Lamar University, Department of Speech and Hearing Sciences |
| Keywords:                     | Audiology < OTOLARYNGOLOGY, Adult otolaryngology < OTOLARYNGOLOGY, Depression & mood disorders < PSYCHIATRY                                                                                                                                                                                                                                                                                                                |
|                               |                                                                                                                                                                                                                                                                                                                                                                                                                            |

SCHOLARONE™  
Manuscripts

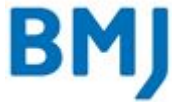

I, the Submitting Author has the right to grant and does grant on behalf of all authors of the Work (as defined in the below author licence), an exclusive licence and/or a non-exclusive licence for contributions from authors who are: i) UK Crown employees; ii) where BMJ has agreed a CC-BY licence shall apply, and/or iii) in accordance with the terms applicable for US Federal Government officers or employees acting as part of their official duties; on a worldwide, perpetual, irrevocable, royalty-free basis to BMJ Publishing Group Ltd ("BMJ") its licensees and where the relevant Journal is co-owned by BMJ to the co-owners of the Journal, to publish the Work in this journal and any other BMJ products and to exploit all rights, as set out in our [licence](#).

The Submitting Author accepts and understands that any supply made under these terms is made by BMJ to the Submitting Author unless you are acting as an employee on behalf of your employer or a postgraduate student of an affiliated institution which is paying any applicable article publishing charge ("APC") for Open Access articles. Where the Submitting Author wishes to make the Work available on an Open Access basis (and intends to pay the relevant APC), the terms of reuse of such Open Access shall be governed by a Creative Commons licence – details of these licences and which [Creative Commons](#) licence will apply to this Work are set out in our licence referred to above.

Other than as permitted in any relevant BMJ Author's Self Archiving Policies, I confirm this Work has not been accepted for publication elsewhere, is not being considered for publication elsewhere and does not duplicate material already published. I confirm all authors consent to publication of this Work and authorise the granting of this licence.

1  
2  
3 **Predictors of outcomes of internet-based cognitive behavioral therapy**  
4  
5  
6 **intervention for individuals with tinnitus**  
7  
8  
9

10  
11 **Hansapani Rodrigo,<sup>1</sup> Eldré W. Beukes,<sup>2,3</sup> Gerhard Andersson,<sup>4,5</sup> & Vinaya Manchaiah,<sup>2,6</sup>**  
12

- 13  
14 1. School of Mathematical and Statistical Sciences, University of Texas Rio Grande Valley,  
15 Texas, USA  
16  
17 2. Department of Speech and Hearing Sciences, Lamar University, Beaumont, Texas, USA  
18  
19 3. Department of Vision and Hearing Sciences, School of Psychology and Sport Science,  
20  
21 Anglia Ruskin University, Cambridge, United Kingdom  
22  
23 4. Department of Behavioral Sciences and Learning, Department of Biomedical and Clinical  
24  
25 Sciences, Linköping University, Linköping, Sweden  
26  
27 5. Department of Clinical Neuroscience, Division of Psychiatry, Karolinska Institute,  
28  
29 Stockholm, Sweden  
30  
31 6. Department of Speech and Hearing, School of Allied Health Sciences, Manipal,  
32  
33 Karnataka, India  
34  
35  
36  
37  
38  
39  
40

41 **Corresponding author:** Prof. Vinaya Manchaiah

42  
43 **Communication address:** Department of Speech and Hearing Sciences,  
44  
45 Lamar University, Beaumont, Texas 77710, USA  
46  
47

48 **Email:** [vinaya.manchaiah@lamar.edu](mailto:vinaya.manchaiah@lamar.edu)  
49

50 **Tel:** +1 (409) 880 8927  
51

52 **Fax:** +1 (409) 880 2265  
53  
54  
55  
56  
57  
58  
59  
60

## Abstract

**Objectives:** The current study examined predictors of outcomes of internet-based cognitive behavioral therapy (ICBT) for individuals with tinnitus.

**Design:** The study included a secondary analysis of intervention studies.

**Setting:** Internet-based guided intervention.

**Participants:** A total of 228 individuals who underwent ICBT in three separate clinical trials.

**Interventions:** ICBT.

**Primary and secondary outcome measures:** A significant reduction in tinnitus severity (13-point reduction in Tinnitus Functional Index (TFI) scores) following undertaking the intervention was used as the main outcome variable. Predictor variables included various demographic, tinnitus, hearing-related, and treatment-related variables as well as clinical factors (i.e., anxiety, depression, insomnia, hyperacusis, hearing disability, cognitive function, and life satisfaction).

**Results:** Of the 228 subjects who were included in the study, 66% had a successful outcome of the treatment. The baseline tinnitus severity was found to be a significant variable as per Chi square univariate analysis. Both linear and logistic regression models identified education level, baseline tinnitus severity, and hearing aid use as significant predictor variables contributing to reduction in tinnitus severity post-ICBT intervention after adjusting for the effect of the baseline tinnitus severity.

**Conclusions:** Predictors of intervention outcome can be used as a means of triaging patients to the most suited form of treatment to achieve optimal outcomes and to make healthcare savings. As no strong predictors were identified other than the baseline tinnitus severity, future studies should consider including a heterogeneous group of participants as well as using various

1  
2  
3 advanced artificial intelligence and machine learning techniques to identify possible predictive  
4 factors.  
5  
6  
7  
8  
9

## 10 **Key Words**

11  
12 Tinnitus, Internet interventions, Digital therapeutics, Predictors of outcomes, Cognitive  
13 behavioral therapy  
14  
15  
16  
17  
18  
19

## 20 **Strengths and limitations of the study**

- 21  
22     ▪ This study examines the predictors of ICBT on individuals with tinnitus from a pooled  
23 sample of several clinical trials.
- 24  
25     ▪ Homogeneity of participants in the included studies may be the main reason for not having  
26 any strong predictors of outcomes.
- 27  
28     ▪ The study sample size and also limited number of potential predictors may have also  
29 contributed to not finding any strong predictors of ICBT outcome.  
30  
31  
32  
33  
34  
35  
36  
37

## 38 **Introduction**

39  
40  
41 Tinnitus is the perception of sounds in the absence of external stimulation and is often heard as a  
42 ringing or buzzing meaningless sound(s). It is a very common condition with at least 15% of  
43 the adult population having tinnitus.<sup>1</sup> Tinnitus is highly heterogeneous, both in the way it  
44 manifests as well as in the manner those with tinnitus respond to treatment options.<sup>2</sup> Most  
45 individuals with tinnitus are not much bothered by the sounds, but a proportion (2/10) find  
46 tinnitus much distressing and need help to reduce the negative effects of their tinnitus. Although  
47 there are several management strategies described in the literature, most are not evidence based.  
48  
49  
50  
51  
52  
53  
54  
55  
56  
57  
58  
59  
60

1  
2  
3 The main exception is Cognitive Behavioral Therapy (CBT), as indicated in various systematic  
4 reviews of randomized controlled trials.<sup>3-6</sup> Clinical practice guidelines, based on research  
5 evidence and expert consensus, thus recommends CBT as a management option for individuals  
6 with tinnitus and is supported by the American Academy of Otolaryngology – Head and Neck  
7 Surgery (AAO-HNS).<sup>7</sup>  
8  
9  
10  
11  
12  
13  
14  
15  
16

17 Despite positive and strong evidence for CBT, individuals with tinnitus are rarely offered CBT in  
18 their local clinics. For example, a large-scale epidemiological study in the US showed that  
19 medication (which is not recommended for tinnitus in clinical guidelines) was discussed 50% of  
20 the time by health professionals, whereas the CBT was discussed as a management option only  
21 0.2% of the time.<sup>8</sup> This is most likely a consequence of the limited number of trained  
22 professionals who provide CBT for tinnitus. One solution to overcome this issue is to use  
23 Internet-based CBT (ICBT), in which patients are provided with CBT in a self-help format over  
24 the internet with minimal guidance from a tinnitus expert.<sup>9</sup> A series of controlled studies in  
25 Sweden, Germany, the United Kingdom and the United States have demonstrated positive effects  
26 of ICBT in reducing tinnitus distress as well as reducing its comorbidities such as anxiety,  
27 depression, insomnia.<sup>9</sup> In addition to the changes noted in standardized outcome measures, the  
28 qualitative analysis of user experiences has highlighted the perceived benefits of this program.<sup>10</sup>  
29  
30 In addition, the improvements noted from ICBT have been maintained for 1-year post-  
31 intervention. These results suggest that ICBT is a highly promising approach to provide  
32 evidence-based tinnitus management.  
33  
34  
35  
36  
37  
38  
39  
40  
41  
42  
43  
44  
45  
46  
47  
48  
49  
50  
51  
52  
53  
54  
55  
56  
57  
58  
59  
60

1  
2  
3 Although the previous studies on ICBT have shown favorable results, they have mainly reported  
4 group effects. There is limited understanding of who are likely to benefit (or not) from the ICBT  
5 intervention. In other words, only a few studies have examined predictors of ICBT outcomes in  
6 tinnitus research. For example, the long-term analysis of the previous UK studies suggested that  
7 the best predictors of tinnitus improvements at 1-year were the baseline tinnitus severity,  
8 engagement with ICBT program (i.e., more modules read), and higher self-reported satisfaction  
9 with the intervention.<sup>11</sup> Studies in other health areas have also examined the predictors of  
10 outcome for a range of internet-based health interventions.<sup>12-16</sup> These studies have inconsistently  
11 identified various demographic as well as disease specific variables that could predict the  
12 successful and non-successful participants in internet-interventions.<sup>16</sup> There remains a clear gap  
13 in knowledge in terms of predictors of ICBT outcomes for tinnitus.

14  
15  
16  
17  
18  
19  
20  
21  
22  
23  
24  
25  
26  
27  
28  
29  
30  
31 Predictors of intervention outcomes may help triage patients to the most suitable tinnitus  
32 intervention. If interventions are recommended based on their suitability, it can potentially  
33 improve the outcomes which would result in healthcare savings. The objective of the current  
34 study was to examine the predictors of outcomes of ICBT intervention for individuals with  
35 tinnitus based on the secondary analysis of the pooled results from the three-phase clinical trial  
36 undertaken in the UK.

## 37 38 39 40 41 42 43 44 45 46 47 **Method**

### 48 49 50 **Study design and participants**

51  
52 The study was a secondary analysis of data collected three separate ICBT trials. Study  
53 participants from the three separate trials with different designs including the single-group  
54  
55  
56  
57  
58  
59  
60



1  
2  
3 pretest posttest design,<sup>17</sup> an efficacy RCT design (Clinical Trials.gov: NCT02370810),<sup>18</sup> and an  
4 effectiveness RCT design (Clinical Trials.gov: NCT02665975)<sup>19</sup> were combined. These studies  
5 were conducted during 2016-18. In the efficacy trial, the experimental group underwent ICBT  
6 immediately after allocation whereas the control group underwent the same intervention  
7 following an 8-week weekly check-in period. In the effectiveness trial, the experimental group  
8 underwent the ICBT interevent whereas the control group underwent treatment as usual  
9 consisting of in-person tinnitus counselling and sound therapy, provided by the audiologists at  
10 three hospital settings. The data from only those who underwent the ICBT intervention was  
11 included in this study. The ethical clearance for these studies was obtained from the Faculty of  
12 Science and Technology Research Ethics Panel of Anglia Ruskin University (ARU reference:  
13 FST/FREP/14/478 and FST/FREP/14/478) and the East of England–Cambridge South Research  
14 Ethics Committee (REC reference: 16/EE/0148) and Health Research Authority (IRAS project  
15 ID: 195565). The study results are presented using the TRIPOD checklist (see Appendix 1).  
16  
17  
18  
19  
20  
21  
22  
23  
24  
25  
26  
27  
28  
29  
30  
31  
32  
33  
34

35 Combining the data from three trials resulted in inclusion of 228 participants. Of these, 36 were  
36 from the pilot trial, 146 from the efficacy trial, and the remaining 46 were from the effectiveness  
37 trial.  
38  
39  
40  
41  
42  
43

## 44 **Intervention**

45 The intervention included a CBT program that was specifically developed for individuals with  
46 tinnitus.<sup>20</sup> This intervention was originally developed by psychologists in Sweden,<sup>21</sup> but later  
47 adapted by audiologists in the UK<sup>22</sup> and the US.<sup>23</sup> The intervention was administered using a  
48 secured ePlatform,<sup>24,25</sup> and presented in a self-help format. The intervention was presented over  
49  
50  
51  
52  
53  
54  
55  
56  
57  
58  
59  
60

1  
2  
3 8-weeks period, during which the users were given access to 2-3 modules each week. The CBT  
4 program was divided into 21 modules, of which 5 were optional. The modules included content  
5 such as applied relaxation, thought analysis, cognitive restructuring, imagery, and exposure  
6 techniques. Each module included text, images, and videos to enhance user experience. In  
7 addition, they included various exercises that users have to complete to engage them in the  
8 intervention. Although the intervention was presented in a self-help format, the users had access  
9 to minimal guidance from an audiologist (EB). Generally, this included examining weekly  
10 exercises users completed and providing feedback as well as answering any questions they may  
11 have in the secured messaging system. An average of 10 minutes per participant was spent on  
12 providing guidance and support, although some users required more support.  
13  
14  
15  
16  
17  
18  
19  
20  
21  
22  
23  
24  
25  
26  
27

### 28 **Outcome measures**

29  
30 The study participants completed an extensive pre-intervention questionnaire that collected data  
31 on demographics, tinnitus-related and treatment-related history. In addition, participants also  
32 completed various standardized patient-reported outcome measures (PROMs) at baseline (T0), at  
33 postintervention (T1) and 2-months follow-up (T2). The *primary outcome measure* included the  
34 Tinnitus Functional Index (TFI)<sup>26</sup> to assess tinnitus severity/distress. This is a 25-item  
35 questionnaire with scores ranging between 0 to 100. Scores below 25 indicate mild tinnitus with  
36 no need for intervention, scores ranging between 25 to 50 indicate significant problem with  
37 possible need for intervention, and scores above 50 indicate severe enough tinnitus possibly  
38 requiring a more intensive intervention. The TFI has good psychometric properties with  
39 acceptable internal consistency (0.97) and test-retest reliability (0.8).<sup>26</sup>  
40  
41  
42  
43  
44  
45  
46  
47  
48  
49  
50  
51  
52  
53  
54  
55  
56  
57  
58  
59  
60

1  
2  
3 The *secondary outcome measures* included the Insomnia Severity Index (ISI)<sup>27</sup> as a measure of  
4 insomnia, the Generalized Anxiety Disorder (GAD-7)<sup>28</sup> as a measure of anxiety, the Patient  
5 Health Questionnaire (PHQ-9)<sup>29</sup> as a measure of depression, the Hearing Handicap Inventory for  
6 Adults Screening version (HHIA-S)<sup>30</sup> as a measure of self-reported hearing disability, the  
7 Hyperacusis Questionnaire (HQ)<sup>31</sup> to assess the presence hyperacusis (i.e., reduced tolerance of  
8 everyday sounds), the Cognitive Failures Questionnaire (CFQ)<sup>32</sup> was administered to assess  
9 cognitive functions, and the Satisfaction with Life Scales (SWLS)<sup>33</sup> to assess the global life  
10 satisfaction.  
11  
12  
13  
14  
15  
16  
17  
18  
19  
20  
21  
22  
23

#### 24 **Patient and public involvement**

25  
26 No patient involved.  
27  
28  
29  
30

#### 31 **Variables included in the predictive model**

32  
33 **Outcome Variable:** The main dependent variable was the pre- and post-intervention change in  
34 tinnitus distress based on the TFI score (TFI change). The 13-point change in TFI scores,  
35 identified as a clinically meaningful (or significant) change by the original authors<sup>26</sup> was used to  
36 define a clinically significant intervention outcome.  
37  
38  
39  
40  
41  
42  
43

44 **Predictor Variables:** Thirty-two variables from the pre-intervention questionnaires were selected  
45 as potential predictor (independent) variables based on clinical reasoning and findings from  
46 previous studies by Beukes et al.<sup>11</sup> (see Appendix 2 for details). These included:  
47  
48  
49  
50  
51  
52  
53  
54  
55  
56  
57  
58  
59  
60

- 1  
2  
3  
4  
5  
6  
7  
8  
9  
10  
11  
12  
13  
14  
15  
16  
17  
18  
19  
20  
21  
22  
23  
24  
25  
26  
27  
28  
29  
30  
31  
32  
33  
34  
35  
36  
37  
38  
39  
40  
41  
42  
43  
44  
45  
46  
47  
48  
49  
50  
51  
52  
53  
54  
55  
56  
57  
58  
59  
60
- Demographic variables (n=7): age (dichotomous), gender (dichotomous), education level (ordinal), employment type (categorical), loud noise exposure (dichotomous), diagnosed with a psychological condition (dichotomous), work less due to tinnitus (categorical).
- Tinnitus and hearing-related variables (n=15): baseline tinnitus severity (dichotomous), tinnitus duration (dichotomous), how often tinnitus heard (ordinal), tinnitus location (categorical), tinnitus types (9 different types, dichotomous), multiple tones heard (dichotomous), and hearing loss (categorical).
- Treatment-related to tinnitus (n=4): past treatment sought (dichotomous), sounds can distract from tinnitus (ordinal), hearing aid use (categorical), and medication use (dichotomous).
- Clinical factors (n=7): anxiety (dichotomous), depression (dichotomous), insomnia (dichotomous), hyperacusis (dichotomous), hearing disability (dichotomous), cognitive functions (dichotomous), and life satisfaction (dichotomous).

### Data analysis

The data were analyzed using the descriptive statistics as well as univariate and multivariable linear regression and logistic regression models. A careful analysis on missing post TFI scores, with several competing imputation methods, lead final imputations to be performed based on mean imputation. Therefore, the post-TFI scores of 38 subjects were missing and were imputed using means of their corresponding trials.

The univariate analysis was performed using Chi-square or Fishers exact test to examine the effect of single variables on the ICBT outcome. The multivariate regression model was used to

1  
2  
3 identify the effect of the variables on tinnitus reduction post ICBT, while adjusting for the  
4  
5 baseline tinnitus severity, as a variable previously identified to related to the success of ICBT.<sup>11</sup>  
6  
7 Prior to the multivariate analyses, the full data set was divided into the training (80%,  $n = 183$ )  
8  
9 and testing (20%,  $n = 45$ ). The training data set was used to develop the corresponding  
10  
11 (linear/multivariate) regression models while the testing data set was used to evaluate the model  
12  
13 predictions. Several competing multivariable models (both linear and logistic) were examined.  
14  
15 The best models were selected based on the lowest mean squared error and the lowest Akaike  
16  
17 Information Criterion (AIC).<sup>34</sup> Both crude and model-based odds ratios were calculated and used  
18  
19 to evaluate the effect of the variable. The Hosmer-Lemeshow goodness-of-fit statistic was  
20  
21 calculated to assess the calibration of the final model.<sup>35</sup> The discriminative ability of the model  
22  
23 was assessed with the area under the curve (AUC). The predictions were evaluated based on the  
24  
25 model accuracy, sensitivity and the specificity on the testing data.  
26  
27  
28  
29  
30  
31  
32

33 The dependent variable TFI change was used as a continuous variable for a linear regression  
34  
35 analysis whereas the dichotomous variable (i.e., 13-point change yes or no) was used for logistic  
36  
37 regression analysis. All statistical analyses were performed with R statistical software (Version:  
38  
39 3.6.3). All tests were two sided and threshold at 10% level of significance due to the exploratory  
40  
41 nature of the study to account for the medium sample size and control for both Type I and type II  
42  
43 errors effectively.<sup>36,37</sup>  
44  
45  
46  
47  
48

## 49 **Results**

### 50 **Participant demographics**

51  
52  
53  
54  
55  
56  
57  
58  
59  
60

1  
2  
3 The mean age of study participants was 55.14 (SD: 12.92) years, and 57% of the subjects  
4 (n=130) were males. The mean tinnitus duration was 17.68 (SD: 19.42) years. Further details on  
5 demographic, tinnitus, hearing-related and treatment related variables are provided in Appendix 3.  
6  
7 Table 1 presents details on clinical variables. The mean baseline tinnitus severity and tinnitus  
8 severity following the ICBT intervention were 57.93 (SD: 19.17) and 34.22 (SD: 22.78),  
9  
10 respectively. Figure 1 presents the pre- and post-intervention tinnitus severity (TFI) score  
11 variation, indicating statistically significant differences between these scores ( $p < 0.001$ ). There  
12 were 150 participants (66%) with a 13-point or higher reduction after the intervention.  
13  
14  
15  
16  
17  
18  
19  
20  
21  
22  
23

24 <Table 1 here>

25  
26 <Figure 1 here>

### 27 28 29 30 31 **Univariate Analysis to Examine the Predictors of ICBT Outcome**

32  
33 The details of the univariate analyses are provided in Appendix 3 (see Tables 3.2 to 3.5). With the  
34 exception of education level ( $p = .008$ ), none of the demographic variable were associated with  
35 post-intervention tinnitus severity change of 13-point or more. Participants with a master's degree  
36 or above had the highest odds of having a larger severity change score, with an odds ratio of 4.50  
37 (95% C.I: 1.59, 18.47), compared to the participants who had education only up to high school or  
38 less. In terms of tinnitus and hearing-related variables, the baseline tinnitus severity ( $p = 0.04$ )  
39 was significantly associated with treatment success. Participants who had a higher baseline tinntus  
40 severity (i.e., TFI scores of greater than or equal to 55.2) had a significantly higher odds of  
41 treatment success (OR: 1.78) compared to those who had a baseline severity less than 55.2.  
42  
43  
44  
45  
46  
47  
48  
49  
50  
51  
52  
53  
54  
55  
56  
57  
58  
59  
60

1  
2  
3 In terms of the treatment-related variables, sounds can distract ( $p = .027$ ) showed a significant  
4 association with treatment success. Those who reported to be distracted by the sound partially  
5 (OR: 2.97; 95% C.I: 1.28, 6.88) or not at all (OR: 3.31; 95% CI: 1.02, 10.72) were at higher odds  
6 of having a successful treatment outcome when compared to who were fully distracted. However,  
7 the odds among the participants who used hearing aid either in one ear or both ears compared to  
8 those who did not, was not statistically significantly different (Table 3.4 in Appendix 3). None of  
9 the clinical factors were significantly associated with outcome.  
10  
11  
12  
13  
14  
15  
16  
17  
18  
19  
20  
21

### 22 **Multivariate analyses to examine predictors of ICBT outcome**

23  
24 Multivariate linear regression analysis was used to identify contributing predictors of TFI change.  
25  
26 The variables that were included in the final regression model are shown in Table 2. Working less  
27 due to tinnitus ( $p = .004$ ), hearing aid usage ( $p = .04$ ), maskability of tinnitus ( $p = .05$ ), baseline  
28 tinnitus severity ( $p < .001$ ), music type of tinnitus ( $p = .003$ ), education level ( $p = .018$ ), loud noise  
29 exposure ( $p = .09$ ), and depression ( $p = .02$ ) showed significant associations with outcome (TFI  
30 change). Modified models with the variables gender ( $p = .10$ ), hearing loss ( $p = .23$ ), tinnitus type:  
31 buzzing ( $p = .43$ ), tinnitus type: low pitch ( $p = .10$ ), tinnitus type: pulsing ( $p = 0.64$ ), tinnitus type:  
32 clicking ( $p = .27$ ), insomnia ( $p = .26$ ) and satisfaction with life ( $p = .82$ ) were not statistically  
33 significant. Moreover, several two-way interactions were tested. We did not find any gender  
34 interactions with regard to the maskability of sounds ( $p = .42$ ) and) and hearing aid usage  
35 variables ( $p = .44$ ). The overall model fit was evident with R squared = 0.35 and Adj. R squared  
36 of 0.30. The final model resulted in a root mean square of 25.38 on the testing data set, indicating  
37 a better predictive power. All required regression assumptions were satisfied in the selected  
38 model.  
39  
40  
41  
42  
43  
44  
45  
46  
47  
48  
49  
50  
51  
52  
53  
54  
55  
56  
57  
58  
59  
60

1  
2  
3  
4  
5 This model helped in identifying the impact on the TFI score with several predictor variables, as a  
6 result of the ICBT intervention. Participants with depression had approximately 12 points (SE:  
7 4.79) expected reduction in their TFI score. Moreover, participants who had master's degree or  
8 above compared to participants who had college education showed expected reduction of 10-point  
9 (SE: 4.20) in their TFI score. Participants who used hearing aid for one ear had an expected TFI  
10 reduction of 8.95 (SE: 4.42) compared to those who did not use hearing aids. However,  
11 participants who used hearing aid for both ears did not show a significant difference in their TFI  
12 reduction ( $p$ -value: 0.50) compared to those who did not use any. Those who got distracted  
13 partially compared to those who were fully distracted showed an expected TFI reduction of 8.42  
14 (SE: 4.42) after the treatment. Nevertheless, participants who were not distract at all did not show  
15 a significant TFI reduction compared to those who were fully distracted. Also, participants who  
16 described that their tinnitus had a musical quality had the least expected reduction (-51.52,  
17 SE:16.87) in their TFI score with the treatment, followed by participants who were working less  
18 with disability allowance due to their tinnitus (-21.33, SE:7.21). Participants who had loud noise  
19 exposure compared to those who did not also showed an increase in their TFI score (-4.32, SE:  
20 2.58).

21  
22  
23  
24  
25  
26  
27  
28  
29  
30  
31  
32  
33  
34  
35  
36  
37  
38  
39  
40  
41  
42  
43  
44 **<Table 2 here>**

45  
46  
47  
48  
49 Following this, multivariable logistic regressions were performed with 13-point change in TFI  
50 following ICBT intervention (i.e., treatment success) as the dependent variable (see Table 3). In  
51 this analysis, hearing aid usage ( $p = .05$ ), baseline tinnitus severity ( $p < 0.001$ ), clicking type of  
52  
53  
54  
55  
56  
57  
58  
59  
60



1  
2  
3 tinnitus ( $p = .03$ ), low pitch type of tinnitus ( $p = .03$ ), education level ( $p = .001$ ), and the presence  
4 of insomnia ( $p = .05$ ) were identified as significant predictors. This model had an AIC of 220.87.  
5  
6 Modified models to the prior model with the variables gender ( $p = .94$ ), presence of a hearing  
7 loss ( $p = .73$ ), tinnitus being masked by sounds ( $p = .33$ ), work less due to tinnitus ( $p = .29$ ),  
8 buzzing type of tinnitus ( $p = 0.15$ ), pulsing type of tinnitus ( $p = 0.73$ ), musical type of tinnitus ( $p$   
9 = .12), loud noise exposure ( $p = .60$ ), depression ( $p = .88$ ), and satisfaction with life ( $p = .70$ ),  
10 separately, were not statistically significant. Several two-way interactions were tested but were  
11 not statistically significant, including any gender differences regarding sounds masking tinnitus  
12 ( $p = .67$ ) and hearing aid usage variables ( $p = .82$ ).  
13  
14  
15  
16  
17  
18  
19  
20  
21  
22  
23  
24  
25

26 The multivariable model adjusted OR (see Table 3) for the participants who were using a hearing  
27 aid in one ear had a 5.48 higher odds (95% CI: 1.02, 29.37) of having a successful outcome with  
28 ICBT intervention compared to the participants who did not use any hearing aid help while there  
29 was no significant difference between the subjects who use hearing aid in both ears compared to  
30 those who do not use any (OR: 0.72 95% CI: 0.33, 1.60). Participants who had master's level or  
31 above education compared to those who had high school education or less also showed 10.71  
32 higher odds (95% CI: 2.28, 50.22) of having successful outcome. Participants who had either low  
33 pitch (OR: 0.16; 95% CI: 0.03, 0.87) or clicking (OR: 0.19; 95% CI: 0.04, 0.82) tinnitus types  
34 had significant lower odds of having successful outcome with the ICBT intervention.  
35  
36  
37  
38  
39  
40  
41  
42  
43  
44  
45

46 Participants with insomnia also had a 0.55 lower odds of success (95% CI: 0.20, 0.99) compared  
47 to those who did not .  
48  
49  
50  
51  
52  
53  
54  
55  
56  
57  
58  
59  
60

1  
2  
3 The Hosmer-Lemeshow goodness-of-fit test confirmed a better fit in the current model with a  $p$ -  
4 value of 0.53 ( $\chi^2=7.10$ ,  $df=8$ ). This model had an AUC of 0.747 and lead to 77.8% accuracy,  
5  
6  
7  
8 80.0% specificity, and 76.7% sensitivity in the testing data set with a cut-off 0.50.  
9

10  
11  
12 <Table 3 here>  
13  
14  
15

16  
17 Fewer variables were statistically significant in the logistic regression model which identified  
18 influencing predictors of the ICBT success. Although depression was identified as a key predictor  
19 for reducing tinnitus severity in the linear regression model, it was not identified as a key  
20 predictor in the multivariate model. Moreover, loud noise exposure was barely significant in the  
21 regression model and was not statistically significant in the logistic regression model. This was  
22 due to the fact that the logistic regression model evaluated predictors of treatment successes (i.e.,  
23 13 point change), while the multivariate regression model identified the predictors of a  
24 significant TFI reductions.  
25  
26  
27  
28  
29  
30  
31  
32  
33  
34  
35  
36  
37

## 38 Discussion

39  
40 Accessible and affordable tinnitus interventions are needed to alleviate the tinnitus distress as well  
41 as comorbid problems with anxiety, depression and insomnia. The current study examined  
42 predictors of outcomes in ICBT. In this exploratory study only a limited number of variables were  
43 identified as possibly reducing tinnitus severity scores on the TFI by at least 13 points following  
44 undertaking an ICBT intervention and the results varied depending on the model used. Only  
45 educational level and using one hearing aid were predictors in both linear and logistic models.  
46  
47  
48  
49  
50  
51  
52  
53

54 Other variables that were significant in either the linear or logistic models included: demographic  
55  
56  
57  
58  
59  
60

1  
2  
3 variables (i.e., working less due to tinnitus, loud noise exposure), tinnitus related variables (i.e.,  
4 tinnitus maskability, types of tinnitus) and treatment related variables (i.e., hearing aid use) and  
5 clinical variables (i.e. higher levels of depression, insomnia) when controlling for baseline tinnitus  
6 severity. These key findings are discussed below.  
7  
8  
9  
10  
11  
12  
13

14  
15 In terms of demographic variables, education level was found to be a significant predictor of  
16 ICBT success as those with a master's education or higher had higher odds of having a successful  
17 outcome compared with those with high school education in both the linear and logistic models.  
18 This was expected as having good literacy skills is essential when understanding the intervention  
19 materials. The intervention materials used in these studies were written at an average of 9<sup>th</sup>  
20 reading grade level,<sup>23</sup> suggesting that they were not easily accessible for participants with only a  
21 high school education. These results highlight the importance of health literacy considerations  
22 when developing text-based self-help interventions such as ICBT. Additionally, those reported to  
23 be working less due to tinnitus were at a lower odds of having a successful outcome. Those  
24 working less because of tinnitus have previously been identified as having higher tinnitus  
25 severity.<sup>38</sup> Closely monitoring the effects of tinnitus is important to ensure that tinnitus can be  
26 managed so that individuals are still able to work effectively.  
27  
28  
29  
30  
31  
32  
33  
34  
35  
36  
37  
38  
39  
40  
41  
42  
43

44  
45 When examining the tinnitus and hearing-related variables, baseline tinnitus severity was found to  
46 be a significant predictor of ICBT success, as seen in previous studies.<sup>11</sup> Tinnitus perceptions vary  
47 greatly and in this study those with tinnitus presenting as musical, lower pitched or clicking were  
48 less likely to have a positive outcome of ICBT. This finding certainly needs further exploration as  
49 the limited number of participants in each group of tinnitus perception. One of the CBT  
50  
51  
52  
53  
54  
55  
56  
57  
58  
59  
60

1  
2  
3 intervention aims is to help participants to reinterpret their tinnitus to a less threatening sound. It  
4 may be that these sounds are not easily likened to everyday sounds than other types of tinnitus  
5 (i.e., buzzing, high pitch, pulsing, humming) making it difficult to develop adaptation strategies.  
6  
7

8  
9  
10  
11  
12 Of the four treatment related variables, only those who reported to use of wearing one hearing aid  
13 were found to be at better odds of ICBT success. This finding need further exploration as to  
14 identify other characteristics that may be associated with outcome such as having tinnitus in only  
15 one ear. Although the evidence for use hearing aids alone for tinnitus management is limited,<sup>39,40</sup>  
16 hearing aids may for some reduce the tinnitus percept and aid communication difficulties.<sup>41</sup>  
17  
18 Ensuring hearing loss is addressed in addition to provision of ICBT may lead to more optimal  
19 outcomes for those with co-existing hearing loss.  
20  
21  
22  
23  
24  
25  
26  
27  
28  
29

30  
31 Regarding studying the clinical factors, those with higher levels of depression were found to have  
32 higher reduction in the TFI score. However, the participants with insomnia showed lower odds of  
33 success. This may be because those with clinical depression and sleepproblems have higher  
34 baseline tinnitus severity.<sup>38</sup> Our previous studies have shown that participants with higher  
35 baseline tinnitus are more likely to benefit from ICBT.<sup>11</sup> These observations strengthen the  
36 argument that those with more severe tinnitus are more likely to need more intensive  
37 interventions.<sup>26</sup> Interestingly, other clinical factors including anxiety, hyperacusis, hearing  
38 disability as well as cognitive functioning were not significant predictors of ICBT in the current  
39 study.  
40  
41  
42  
43  
44  
45  
46  
47  
48  
49  
50  
51  
52  
53  
54  
55  
56  
57  
58  
59  
60

1  
2  
3 Studies in other health areas have also examined the predictors of a range of internet-based health  
4 interventions.<sup>12-15</sup> Generally higher baseline symptoms predict an increased treatment response,  
5  
6 for example in anxiety and depression,<sup>42</sup> and higher obsessive-compulsive behaviours when  
7  
8 treating obsessive-compulsive disorder.<sup>43</sup> Variables such as age and gender have been mentioned  
9  
10 as significant predictors for some ICBT interventions.<sup>15,42</sup> Most previous ICBT interventions have  
11  
12 not identified pre-treatment characteristics to predict or moderate outcomes.<sup>16</sup> Most ICBT studies  
13  
14 have indicated that ICBT works irrespective of treatment history.<sup>42</sup> Contrarily, previous treatment  
15  
16 has shown worse outcomes in some previous studies.<sup>44</sup> However, it may be that some participants  
17  
18 may have sought alternative therapies which have no evidence for tinnitus. For this reason, it  
19  
20 would be useful to examine specific types of previous treatments in future studies to distinguish  
21  
22 between those who had evidence-based interventions before enrolling to ICBT than those who did  
23  
24 not.  
25  
26  
27  
28  
29  
30  
31  
32

### 33 **Study limitations and future research**

34  
35 The current study was to our knowledge the first study to combine data from multiple studies to  
36  
37 examine the predictors of ICBT outcome for tinnitus. However, it has limitations. First, the study  
38  
39 may have included homogeneous group of tinnitus patients due to study inclusion/exclusion  
40  
41 criteria and may not have included all the possible variables (e.g., health literacy, acceptability  
42  
43 and motivation of users, satisfaction from the intervention, intervention engagement) that may  
44  
45 have played a role in ICBT outcome. Second, the sample size remained relatively small when  
46  
47 compared to the number of predictive factors included. Third, multivariate analyses may have  
48  
49 some limitations in terms of examining the complex relationships. Moreover, due to the high  
50  
51 multicollinearity between the predictor variables, there were several competing models which had  
52  
53  
54  
55  
56  
57  
58  
59  
60

1  
2  
3 lead to the same prediction accuracies and root mean square errors. Additionally, these linear  
4  
5 models lack in identifying any predictor variables that has a non-linear relationship with the  
6  
7 response variables. For these reasons, the study results must be viewed as preliminary. Future  
8  
9 studies may benefit from using artificial intelligence and machine learning techniques to examine  
10  
11 the complex relationship between the variables in predicting the ICBT outcomes. Analyses should  
12  
13 be extended with non-linear models like decision trees, support vector machines and neural  
14  
15 networks. Future studies could also examine the predictors of adherence and engagement to  
16  
17 intervention as well as of dropouts.  
18  
19  
20  
21  
22  
23

## 24 **Funding**

25  
26 This work was partially funded by the National Institute on Deafness and Communication  
27  
28 Disorders (NIDCD) of the National Institute of Health (NIH) under the award number  
29  
30 R21DC017214.  
31  
32  
33  
34  
35

## 36 **Twitter**

37  
38 @VManchaiah, @Eldre7, @profGergardA  
39  
40  
41  
42

## 43 **Contributors**

44  
45 HR, VM, EB and GA conceptualized the study. EB administered the intervention and collected  
46  
47 the data. HR performed the data analysis. VM and HR prepared the first draft of the manuscript.  
48  
49 All authors read and approved the final manuscript.  
50  
51  
52  
53

## 54 **Competing interests**

1  
2  
3 None to declare.  
4  
5  
6  
7

## 8 **Patient consent for publication**

9

10 Not required.  
11  
12  
13

## 14 **Data availability statement**

15

16 Data is available for other researchers on request.  
17  
18  
19

## 20 **References**

21  
22

- 23
- 24 1. McCormack, A, Edmondson-Jones, M, Somerset, S. (2016). A systematic review of the  
25 reporting of tinnitus prevalence and severity. *Hearing Research*, 337, 70–79.  
26  
27
  - 28 2. Cederroth, C. R., Gallus, S., Hall, D. A., Kleinjung, T., Langguth, B., Maruotti, A.,  
29 Meyer, M., Norena, A., Probst, T., Pryss, R., Searchfield, G., Shekhawat, G.,  
30 Spiliopoulou, M., Vanneste, S., & Schlee, W. (2019). Editorial: Towards an  
31 Understanding of Tinnitus Heterogeneity. *Frontiers in Aging neuroscience*, 11, 53.  
32  
33 <https://doi.org/10.3389/fnagi.2019.00053>  
34  
35
  - 36 3. Hesser, H., Weise, C., Westin, V. Z., & Andersson, G. (2011). A systematic review and  
37 meta-analysis of randomized controlled trials of cognitive-behavioral therapy for tinnitus  
38 distress. *Clinical Psychology Review*, 31(4), 545-553.  
39  
40
  - 41 4. Hoare, D. J., Kowalkowski, V. L., Kang, S., & Hall, D. A. (2011). Systematic review and  
42 meta-analyses of randomized controlled trials examining tinnitus management. *The*  
43 *Laryngoscope*, 121(7), 1555-1564. doi: 10.1002/lary.21825.  
44  
45  
46  
47  
48  
49  
50  
51  
52  
53  
54  
55  
56  
57  
58  
59  
60

- 1  
2  
3 5. Landry, E. C., Sandoval, X. C. R., Simeone, C. N., Tidball, G., Lea, J., & Westerberg, B.  
4  
5 D. (2020). Systematic review and network meta-analysis of cognitive and/or behavioral  
6  
7 therapies (CBT) for tinnitus. *Otology & Neurotology*, *41*(2), 153-166. [hppt://doi:](https://doi.org/10.1097/MAO.0000000000002472)  
8  
9 10.1097/MAO.0000000000002472  
10  
11
- 12 6. Fuller, T., Cima, R., Langguth, B., Mazurek, B., Vlaeyen, J.W.S., & Hoare, D.J. (2020).  
13  
14 Cognitive behavioural therapy for tinnitus. *Cochrane Database of Systematic Reviews*, *1*,  
15  
16 CD012614. DOI: 10.1002/14651858.CD012614.pub2  
17  
18
- 19 7. Tunkel, D. E., Bauer, C. A., Sun, G. H., Rosenfeld, R. M., Chandrasekhar, S. S.,  
20  
21 Cunningham, E. R., Jr, Archer, S. M., Blakley, B. W., Carter, J. M., Granieri, E. C.,  
22  
23 Henry, J. A., Hollingsworth, D., Khan, F. A., Mitchell, S., Monfared, A., Newman, C.  
24  
25 W., Omole, F. S., Phillips, C. D., Robinson, S. K., Taw, M. B., ... Whamond, E. J.  
26  
27 (2014). Clinical practice guideline: tinnitus. *Otolaryngology--head and neck surgery :  
28  
29 official journal of American Academy of Otolaryngology-Head and Neck Surgery*, *151*(2  
30  
31 Suppl), S1–S40. <https://doi.org/10.1177/0194599814545325>  
32  
33
- 34 8. Bhatt, J.M., Lin, H.W., & Bhattacharyya, N. (2016). Prevalence, severity, exposures, and  
35  
36 treatment patterns of tinnitus in the United States. *JAMA Otolaryngology–Head & Neck  
37  
38 Surgery*, *142* (10), 959-965. DOI: 10.1001/jamaoto.2016.1700  
39  
40
- 41 9. Beukes, E. W., Manchaiah, V., Allen, P. M., Baguley, D. M., & Andersson, G. (2019).  
42  
43 Internet-based interventions for adults with hearing loss, tinnitus, and vestibular  
44  
45 disorders: A systematic review and meta-analysis. *Trends in Hearing*, *23*,  
46  
47 2331216519851749. <https://doi.org/10.1177/2331216519851749>  
48  
49
- 50 10. Beukes, E. W., Manchaiah, V., Davies, A. S., Allen, P. M., Baguley, D. M., &  
51  
52 Andersson, G. (2018c). Participants' experiences of an Internet-based cognitive  
53  
54  
55  
56  
57  
58  
59  
60



- 1  
2  
3 behavioural therapy intervention for tinnitus. *International Journal of Audiology*, 57(12),  
4 947–954.  
5  
6  
7
- 8 11. Beukes, E.W., Manchaiah, V., Baguley, D.M., Allen, P.M. & Andersson, G. (2018d).  
9  
10 Long-term efficacy of Audiologist-guided Internet-based Cognitive Behaviour Therapy  
11 for Tinnitus. *American Journal of Audiology*, 27(3S), 431-447. doi:10.1044/2018\_AJA-  
12 IMIA3-18-0004  
13  
14  
15
- 16 12. Blankers, M., Koeter, M.W. & Schippers, G.M. (2013). Baseline predictors of treatment  
17 outcome in Internet-based alcohol interventions: a recursive partitioning analysis  
18 alongside a randomized trial. *BMC Public Health* 13, 455. [https://doi.org/10.1186/1471-](https://doi.org/10.1186/1471-2458-13-455)  
19 2458-13-455  
20  
21  
22  
23  
24  
25
- 26 13. Chen, H., Rodriguez, M. A., Qian, M., Kishimoto, T., Lin, M., & Berger, T. (2020).  
27 Predictors of treatment outcomes and adherence in internet-based cognitive behavioral  
28 therapy for social anxiety in China. *Behavioural and cognitive psychotherapy*, 48(3),  
29 291–303. <https://doi.org/10.1017/S1352465819000730>  
30  
31  
32  
33  
34
- 35 14. Jonas B., Tensil M.-D., Leuschner F., Strüber E., Tossmann P. Predictors of treatment  
36 response in a web-based intervention for cannabis users. *Internet Interv.* 2019;18:100261.  
37 doi: 10.1016/j.invent.2019.100261.  
38  
39  
40  
41
- 42 15. Spek, V., Nyklíček, I., Cuijpers, P., & Pop, V. (2008). Predictors of outcome of group  
43 and internet-based cognitive behavior therapy. *Journal of affective disorders*, 105(1-3),  
44 137–145. <https://doi.org/10.1016/j.jad.2007.05.001>  
45  
46  
47  
48
- 49 16. Andersson, G., Titov, N., Dear, B. F., Rozental, A., & Carlbring, P. (2019). Internet-  
50 delivered psychological treatments: from innovation to implementation. *World*  
51 *Psychiatry*, 18(1), 20-28. doi:10.1002/wps.20610  
52  
53  
54  
55  
56  
57  
58  
59  
60

- 1  
2  
3 17. Beukes, E. W., Allen, P. M., Manchaiah, V., Baguley, D. M., & Andersson, G. (2017).  
4  
5 Internet-based intervention for tinnitus: Outcome of a single-group open trial. *American*  
6  
7 *Academy of Audiology*, 12(4), 340-351. doi:10.3766/jaaa.16055  
8  
9
- 10 18. Beukes, E. W., Baguley, D. M., Allen, P. M., Manchaiah, V., & Andersson, G. (2018a).  
11  
12 Audiologist-guided Internet-based cognitive behavior therapy for adults with tinnitus in  
13  
14 the United Kingdom: A randomized controlled trial. *Ear and Hearing*, 39(3), 423–433.  
15  
16 <https://doi.org/10.1097/AUD.0000000000000505>  
17  
18
- 19 19. Beukes, E. W., Andersson, G., Allen, P. M., Manchaiah, V., & Baguley, D. M. (2018b).  
20  
21 Effectiveness of guided Internet-based Cognitive Behavioral Therapy vs face-to-face  
22  
23 clinical care for treatment of tinnitus: A randomized clinical trial. *JAMA*  
24  
25 *Otolaryngology—Head & Neck Surgery*, 144(12), 1126–1133.  
26  
27 <https://doi.org/10.1001/jamaoto.2018.2238>  
28  
29
- 30 20. Beukes, E., Andersson, G., Manchaiah, V., & Kaldo, V. (2021). *Cognitive behavioral*  
31  
32 *therapy for tinnitus*. San Diego, USA: Plural Publishing Inc.  
33  
34
- 35 21. Andersson, G., Strömberg, T., Ström, T. & Lyttkens, L. (2002). Randomised controlled  
36  
37 trial of Internet based cognitive behavior therapy for distress associated with tinnitus.  
38  
39 *Psychosomatic Medicine*, 64, 810-816.  
40  
41
- 42 22. Beukes, E. W., Vlaescu, G., Manchaiah, V., Baguley, D. M., Allen, P. M., Kaldo, V., &  
43  
44 Andersson, G. (2016). Development and technical functionality of an Internet-based  
45  
46 intervention for tinnitus in the UK. *Internet Interventions*, 6, 6–15.  
47  
48 <https://doi.org/10.1016/j.invent.2016.08.002>  
49  
50
- 51 23. Beukes, E. W., Fagelson, M., Aronson, E. P., Munoz, M. F., Andersson, G., &  
52  
53 Manchaiah, V. (2020). Readability following cultural and linguistic adaptations of an  
54  
55  
56  
57  
58  
59  
60

- 1  
2  
3 Internet-based intervention for tinnitus for use in the United States. *American Journal of*  
4 *Audiology*, 29(2), 97–109. [https://doi.org/10.1044/2019\\_AJA-19-00014](https://doi.org/10.1044/2019_AJA-19-00014)  
5  
6  
7  
8 24. Vlaescu, G., Alasjö, A., Miloff, A., Carlbring, P., & Andersson, G. (2016). Features and  
9  
10 functionality of the Iterapi platform for Internet-based psychological treatment. *Internet*  
11 *Interventions*, 6, 107–114. <https://doi.org/10.1016/j.invent.2016.09.006>  
12  
13  
14  
15 25. Manchaiah, V., Vlaescu, G., Varadaraj, S., Aronson, E. P., Fagelson, M. A., Munoz, M.  
16  
17 F., Andersson, G., & Beukes, E. W. (2020). Features, Functionality, and Acceptability of  
18  
19 Internet-Based Cognitive Behavioral Therapy for Tinnitus in the United States. *American*  
20 *Journal of Audiology*, 29(3), 476–490. [https://doi.org/10.1044/2020\\_AJA-20-00002](https://doi.org/10.1044/2020_AJA-20-00002)  
21  
22  
23  
24 26. Meikle, M. B., Henry, J. A., Griest, S. E., et al. (2012). The tinnitus functional index:  
25  
26 development of a new clinical measure for chronic, intrusive tinnitus. *Ear Hear*, 33, 153–  
27  
28 176.  
29  
30  
31 27. Bastien, C. H., Vallières, A., Morin, C. M. (2001). Validation of the Insomnia Severity  
32  
33 Index as an outcome measure for insomnia research. *Sleep Med*, 2, 297–307.  
34  
35  
36 28. Spitzer, R. L., Kroenke, K., Williams, J. B., et al. (2006). A brief measure for assessing  
37  
38 generalized anxiety disorder: the GAD-7. *Arch Intern Med*, 166, 1092–1097.  
39  
40  
41 29. Spitzer, R. L., Kroenke, K., Williams, J. B. (1999). Validation and utility of a self-report  
42  
43 version of PRIME-MD: the PHQ primary care study. *Primary Care Evaluation of Mental*  
44  
45 *Disorders. Patient Health Questionnaire. JAMA*, 282, 1737–1744.  
46  
47  
48 30. Newman, C. W., Weinstein, B. E., Jacobson, G. P., et al. (1991). Test-retest reliability of  
49  
50 the hearing handicap inventory for adults. *Ear Hear*, 12, 355–357.  
51  
52  
53 31. Khalfa, S., Dubal, S., Vuillet, E., et al. (2002). Psychometric normalization of a  
54  
55 hyperacusis questionnaire. *ORL J Otorhinolaryngol Relat Spec*, 64, 436–442.  
56  
57  
58  
59  
60

- 1  
2  
3 32. Broadbent, D. E., Cooper, P. F., FitzGerald, P., et al. (1982). The Cognitive Failures  
4 Questionnaire (CFQ) and its correlates. *Br J Clin Psychol*, 21 (Pt 1), 1–16.  
5  
6  
7  
8 33. Diener, E., Emmons, R. A., Larsen, R. J., et al. (1985). The Satisfaction With Life Scale.  
9  
10 J Pers Assess, 49, 71–75.  
11  
12 34. Akaike, H. (1974). A new look at the statistical model identification. *IEEE Transactions*  
13  
14 *on Automatic Control*, 19 (6): 716–723  
15  
16 35. Agresti, A. (2013) *Categorical Data Analysis*. 3rd Edition, John Wiley & Sons Inc.,  
17  
18 Hoboken.  
19  
20  
21 36. Leahey E. (2005) Alphas and asterisks: The development of statistical significance  
22  
23 testing standards in sociology. *Social Forces*, 84, 1–24.  
24  
25  
26 37. Warner R. M. (2013) *Applied statistics: From bivariate through multivariate techniques*.  
27  
28 (2nd ed.) Los Angeles, CA: Sage.  
29  
30  
31 38. Zöger, S., Svedlund, J., & Holgers, K. M. (2006). Relationship between tinnitus severity  
32  
33 and psychiatric disorders. *Psychosomatics*, 47(4), 282–288.  
34  
35 <https://doi.org/10.1176/appi.psy.47.4.282>  
36  
37  
38 39. Hoare, D. J., Edmondson-Jones, M., Sereda, M., Akeroyd, M. A., & Hall, D. (2014).  
39  
40 Amplification with hearing aids for patients with tinnitus and co-existing hearing  
41  
42 loss. *The Cochrane database of systematic reviews*, (1), CD010151.  
43  
44 <https://doi.org/10.1002/14651858.CD010151.pub2>  
45  
46  
47 40. Shekhawat, G. S., Searchfield, G. D., & Stinear, C. M. (2013). Role of hearing AIDS in  
48  
49 tinnitus intervention: a scoping review. *Journal of the American Academy of*  
50  
51 *Audiology*, 24(8), 747–762. <https://doi.org/10.3766/jaaa.24.8.11>  
52  
53  
54  
55  
56  
57  
58  
59  
60

- 1  
2  
3 41. Del Bo, L., & Ambrosetti, U. (2007). Hearing aids for the treatment of tinnitus. *Progress*  
4 *in brain research*, 166, 341–345. [https://doi.org/10.1016/S0079-6123\(07\)66032-4](https://doi.org/10.1016/S0079-6123(07)66032-4)  
5  
6  
7  
8 42. Stjerneklar, S., Hougaard, E., & Thastum, M. (2019). Guided internet-based cognitive  
9  
10 behavioral therapy for adolescent anxiety: predictors of treatment response. *Internet*  
11 *interventions*, 15, 116-125. <https://doi.org/10.1016/j.invent.2019.01.003>  
12  
13  
14  
15 43. Andersson, E., Ljótsson, B., Hedman, E., Enander, J., Kaldo, V., Andersson, G.,  
16  
17 Lindefors, N. and Rück, C. (2015). Predictors and moderators of Internet-based cognitive  
18  
19 behavior therapy for obsessive–compulsive disorder: Results from a randomized  
20  
21 trial. *Journal of Obsessive-Compulsive and Related Disorders*, 4: 1-7.  
22  
23 <https://doi.org/10.1016/j.jocrd.2014.10.003>  
24  
25  
26 44. Andersson, G. (1997). Prior treatments in a group of tinnitus sufferers seeking treatment.  
27  
28 *Psychotherapy and Psychosomatics*, 66, 107-110.  
29  
30  
31  
32  
33  
34  
35  
36  
37  
38  
39  
40  
41  
42  
43  
44  
45  
46  
47  
48  
49  
50  
51  
52  
53  
54  
55  
56  
57  
58  
59  
60

## Tables

**Table 1: Details of clinical variables of the study participants**

| Characteristic                                                              | Mean (SD)     |
|-----------------------------------------------------------------------------|---------------|
| Pre-intervention tinnitus severity (measured using TFI, scores range 0-11)  | 57.93 (19.17) |
| Post-intervention tinnitus severity (measured using TFI, scores range 0-11) | 34.22 (22.78) |
| 2-month follow up tinnitus severity (measured using TFI, scores range 0-11) | 34.23 (24.19) |
| Anxiety (measured using GAD-7, scores range 0-21)                           | 7.29 (5.52)   |
| Depression (measured using PHQ-9, scores range 0-27)                        | 7.61 (5.73)   |
| Insomnia (measured using ISI, scores range 0-28)                            | 12.49 (6.67)  |
| Hyperacusis (measured using HQ, scores range 0-40)                          | 18.33 (9.05)  |
| Hearing disability (measured using the HHIA-S, scores range 0-40)           | 16.18 (11.64) |
| Cognitive failures (measured using the CFQ, scores range 0-100)             | 38.54 (15.63) |
| Life satisfaction (measured using SWLS, scores range 0-40)                  | 20.71 (7.55)  |

**Table 2: The best multiple linear regression model summary**

| Predictor Variable                        | Estimate | SE    | P-value           |
|-------------------------------------------|----------|-------|-------------------|
| Intercept                                 | -7.97    | 5.65  | 0.16              |
| Work less: No                             | Ref      |       |                   |
| Work less: Reduced hours                  | -4.09    | 7.68  | 0.59              |
| Work less: Stopped work                   | -1.63    | 3.98  | 0.68              |
| Work less: Disability allowance           | -21.33   | 7.21  | <b>0.004</b>      |
| Hearing aids: No                          | Ref      |       |                   |
| Hearing aids: One ear                     | 8.98     | 4.42  | <b>0.04</b>       |
| Hearing aids: Both ears                   | -2.11    | 3.13  | 0.5               |
| Sounds mask tinnitus: Fully               | Ref      |       |                   |
| Sounds mask tinnitus: Partially           | 8.42     | 4.33  | <b>0.053</b>      |
| Sounds mask tinnitus: Not at all          | 0.07     | 5.93  | 0.99              |
| Baseline tinnitus severity                | 0.39     | 0.08  | <b>&lt;0.0001</b> |
| Tinnitus type: Music                      | -52.52   | 16.87 | <b>0.003</b>      |
| Education Level: High school or less      | Ref      |       |                   |
| Education Level: College                  | -4.61    | 3.82  | 0.23              |
| Education Level: Vocational training      | 0.66     | 4.2   | 0.88              |
| Education Level: Bachelor's degree        | 3.91     | 3.42  | 0.25              |
| Education Level: Master's degree or above | 10       | 4.19  | <b>0.018</b>      |
| Depression: No                            | Ref      |       |                   |
| Depression: Yes                           | 16.86    | 4.79  | <b>0.014</b>      |
| Loud noise exposure: No                   | Ref      |       |                   |

|                          |       |      |              |
|--------------------------|-------|------|--------------|
| Loud noise exposure: Yes | -5.28 | 2.58 | <b>0.097</b> |
|--------------------------|-------|------|--------------|

**Table 3: The multivariable logistic regression model summary and the model adjusted odds ratio (95% confidence interval) for successful ICBT outcome of 13 points of higher.**

|                                           | Estimate | SE   | P-value           | Model based adjusted OR (95% CI for OR) |
|-------------------------------------------|----------|------|-------------------|-----------------------------------------|
| Intercept                                 | -1.43    | 0.68 | 0.04              | 0.24 (0.06, 0.90)                       |
| Hearing aid use: No                       | Ref      |      |                   |                                         |
| Hearing aid use: One ear                  | 1.7      | 0.86 | <b>0.047</b>      | <b>5.48 (1.02, 29.37)</b>               |
| Hearing aid use: Both ears                | -0.32    | 0.4  | 0.42              | 0.72 (0.33,1.60)                        |
| Baseline tinnitus severity                | 0.04     | 0.01 | <b>&lt; 0.001</b> | <b>1.04 (1.02, 1.06)</b>                |
| Tinnitus type; Clicking: No               | Ref      |      |                   |                                         |
| Tinnitus type; Clicking: Yes              | -1.66    | 0.74 | <b>0.03</b>       | <b>0.19 (0.04, 0.82)</b>                |
| Tinnitus type; Low pitched: No            | Ref      |      |                   |                                         |
| Tinnitus type; Low pitched: Yes           | -1.83    | 0.86 | <b>0.03</b>       | <b>0.16 (0.03, 0.87)</b>                |
| Education level: High school or less      | Ref      |      |                   |                                         |
| Education level: College                  | -0.5     | 0.48 | 0.30              | 0.61 (0.23, 1.57)                       |
| Education level: Vocational training      | 0.55     | 0.55 | 0.32              | 1.73 (0.59, 5.11)                       |
| Education level: Bachelor's degree        | 0.52     | 0.46 | 0.26              | 1.69 (0.68, 4.2)                        |
| Education level: Master's degree or above | 2.37     | 0.79 | <b>0.001</b>      | <b>10.71 (2.28, 50.22)</b>              |
| Insomnia: No                              | Ref      |      |                   |                                         |
| Insomnia: Yes                             | -0.81    | 0.41 | <b>0.047</b>      | <b>0.45 (0.20, 0.99)</b>                |



## Figure Legends

**Figure 1: Tinnitus severity (TFI scores) pre- and post-intervention.** Boxplot represents the five-number summary (minimum, first quartile, median, third quartile, and maximum). The thick dark line represents the median.

For peer review only

## Figures

**Figure 1: Tinnitus severity (TFI scores) pre- and post-intervention.** Boxplot represents the five-number summary (minimum, first quartile, median, third quartile, and maximum). The thick dark line represents the median.

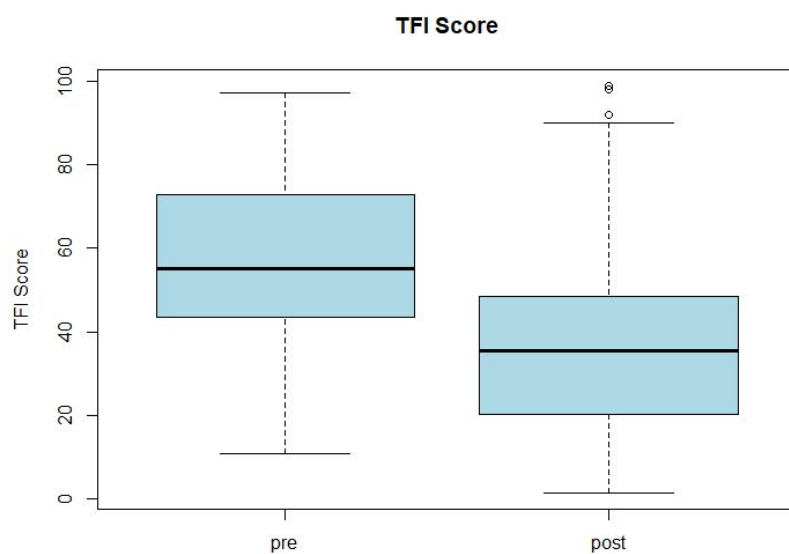

## TRIPOD Checklist: Prediction Model Development

| Section/Topic                | Item | Checklist Item                                                                                                                                                                                        | Page  |
|------------------------------|------|-------------------------------------------------------------------------------------------------------------------------------------------------------------------------------------------------------|-------|
| <b>Title and abstract</b>    |      |                                                                                                                                                                                                       |       |
| Title                        | 1    | Identify the study as developing and/or validating a multivariable prediction model, the target population, and the outcome to be predicted.                                                          | 1     |
| Abstract                     | 2    | Provide a summary of objectives, study design, setting, participants, sample size, predictors, outcome, statistical analysis, results, and conclusions.                                               | 2     |
| <b>Introduction</b>          |      |                                                                                                                                                                                                       |       |
| Background and objectives    | 3a   | Explain the medical context (including whether diagnostic or prognostic) and rationale for developing or validating the multivariable prediction model, including references to existing models.      | 3-5   |
|                              | 3b   | Specify the objectives, including whether the study describes the development or validation of the model or both.                                                                                     | 5     |
| <b>Methods</b>               |      |                                                                                                                                                                                                       |       |
| Source of data               | 4a   | Describe the study design or source of data (e.g., randomized trial, cohort, or registry data), separately for the development and validation data sets, if applicable.                               | 6     |
|                              | 4b   | Specify the key study dates, including start of accrual; end of accrual; and, if applicable, end of follow-up.                                                                                        | 6     |
| Participants                 | 5a   | Specify key elements of the study setting (e.g., primary care, secondary care, general population) including number and location of centres.                                                          | 6     |
|                              | 5b   | Describe eligibility criteria for participants.                                                                                                                                                       | 6     |
|                              | 5c   | Give details of treatments received, if relevant.                                                                                                                                                     | 6-7   |
| Outcome                      | 6a   | Clearly define the outcome that is predicted by the prediction model, including how and when assessed.                                                                                                | 8-9   |
|                              | 6b   | Report any actions to blind assessment of the outcome to be predicted.                                                                                                                                | NA    |
| Predictors                   | 7a   | Clearly define all predictors used in developing or validating the multivariable prediction model, including how and when they were measured.                                                         | 8-9   |
|                              | 7b   | Report any actions to blind assessment of predictors for the outcome and other predictors.                                                                                                            | NA    |
| Sample size                  | 8    | Explain how the study size was arrived at.                                                                                                                                                            | 9     |
| Missing data                 | 9    | Describe how missing data were handled (e.g., complete-case analysis, single imputation, multiple imputation) with details of any imputation method.                                                  | 10    |
| Statistical analysis methods | 10a  | Describe how predictors were handled in the analyses.                                                                                                                                                 | 10    |
|                              | 10b  | Specify type of model, all model-building procedures (including any predictor selection), and method for internal validation.                                                                         | 10    |
|                              | 10d  | Specify all measures used to assess model performance and, if relevant, to compare multiple models.                                                                                                   | 10    |
| Risk groups                  | 11   | Provide details on how risk groups were created, if done.                                                                                                                                             | NA    |
| <b>Results</b>               |      |                                                                                                                                                                                                       |       |
| Participants                 | 13a  | Describe the flow of participants through the study, including the number of participants with and without the outcome and, if applicable, a summary of the follow-up time. A diagram may be helpful. | 11    |
|                              | 13b  | Describe the characteristics of the participants (basic demographics, clinical features, available predictors), including the number of participants with missing data for predictors and outcome.    | 11    |
| Model development            | 14a  | Specify the number of participants and outcome events in each analysis.                                                                                                                               | 11    |
|                              | 14b  | If done, report the unadjusted association between each candidate predictor and outcome.                                                                                                              | 11-12 |
| Model specification          | 15a  | Present the full prediction model to allow predictions for individuals (i.e., all regression coefficients, and model intercept or baseline survival at a given time point).                           | 12-15 |
|                              | 15b  | Explain how to use the prediction model.                                                                                                                                                              | 14-15 |
| Model performance            | 16   | Report performance measures (with CIs) for the prediction model.                                                                                                                                      | 14-15 |
| <b>Discussion</b>            |      |                                                                                                                                                                                                       |       |
| Limitations                  | 18   | Discuss any limitations of the study (such as nonrepresentative sample, few events per predictor, missing data).                                                                                      | 18-19 |
| Interpretation               | 19b  | Give an overall interpretation of the results, considering objectives, limitations, and results from similar studies, and other relevant evidence.                                                    | 15-18 |
| Implications                 | 20   | Discuss the potential clinical use of the model and implications for future research.                                                                                                                 | 19    |
| <b>Other information</b>     |      |                                                                                                                                                                                                       |       |
| Supplementary information    | 21   | Provide information about the availability of supplementary resources, such as study protocol, Web calculator, and data sets.                                                                         | 9, 11 |
| Funding                      | 22   | Give the source of funding and the role of the funders for the present study.                                                                                                                         | 19    |

We recommend using the TRIPOD Checklist in conjunction with the TRIPOD Explanation and Elaboration document.

## Appendix 2: Predictor Variables

Table 2.1: Demographic variables

| Variable                               | Question                                                                                              | Response options                                                                                                                                                                                     |
|----------------------------------------|-------------------------------------------------------------------------------------------------------|------------------------------------------------------------------------------------------------------------------------------------------------------------------------------------------------------|
| Age                                    | What is your age?                                                                                     | In years<br><br>Split into dichotomous variables ( $\leq 57$ years of age and $> 57$ years of age) based on the median                                                                               |
| Gender                                 | What is your gender?                                                                                  | Male (1), Female (2)                                                                                                                                                                                 |
| Education level                        | What is the highest level of education you have completed?                                            | Highschool or less (1), College (2), Vocational training (3), Bachelor's degree (4), Master's degree or above (5)                                                                                    |
| Employment type                        | What best describes your employment?                                                                  | Manager (1), Professional (2), Technical (3), Administrative (4), Skilled tradesman (5), Service occupation (6), Medical (7), Sales (8), Home maker (9), Student (10), Retired (11), Unemployed (12) |
| Loud noise exposure                    | Have you been exposed to loud noise?                                                                  | Yes (1) , No (0)                                                                                                                                                                                     |
| Diagnosed with psychological condition | Have you been presently diagnosed with any psychological conditions including anxiety and depression? | Yes (1) , No (0)                                                                                                                                                                                     |
| Work less due to tinnitus              | Do you work less because of your tinnitus?                                                            | No (0), Reduced hours (1), Stopped work (2), Disability allowance (3)                                                                                                                                |

Table 2.2: Tinnitus and hearing-related variables

| Variable                     | Question                                           | Response options                                                                                                     |
|------------------------------|----------------------------------------------------|----------------------------------------------------------------------------------------------------------------------|
| Baseline tinnitus severity   | Measured using the Tinnitus Functional Index (TFI) | Scores range from 0 to 100.<br><br>Split into dichotomous variables ( $\leq 55.2$ and $> 55.2$ ) based on the median |
| Tinnitus duration            | How long have you had tinnitus for?                | In years<br><br>Split into dichotomous variables ( $\leq 10.00$ years and $> 10.00$ years) based on the median       |
| How often is tinnitus heard? | How often is tinnitus heard?                       | Occasionally (1), When taking out my hearing aid(s) (2), At night (3), Most of the time (4), All the time (5)        |
| Tinnitus location            | Where do you notice your tinnitus?                 | One ear (1), Both ears (2), In my head (3), Unsure (4), Other (5)                                                    |

|                                      |                                                                                                                                                                                                                                        |                                                |
|--------------------------------------|----------------------------------------------------------------------------------------------------------------------------------------------------------------------------------------------------------------------------------------|------------------------------------------------|
| Type of tinnitus (9 different types) | <ul style="list-style-type: none"> <li>▪ Ringing</li> <li>▪ Buzzing</li> <li>▪ High pitched sound</li> <li>▪ Low pitched sound</li> <li>▪ Pulsing</li> <li>▪ Clicking</li> <li>▪ Music</li> <li>▪ Voices</li> <li>▪ Humming</li> </ul> | For each item: Yes (1) , No (0)                |
| Multiple tones heard                 | This variable is computed based on responses to types of tinnitus. Answer yes to multiple types of tinnitus was considered as multiple tones heard                                                                                     | Yes (1) , No (0)                               |
| Presence of a hearing loss           | Do you have a hearing loss?                                                                                                                                                                                                            | No (0), Both ears (1), One ear (2), Unsure (3) |

Table 2.3: Treatment-related variables

| Variable                          | Question                                                                                             | Response options                         |
|-----------------------------------|------------------------------------------------------------------------------------------------------|------------------------------------------|
| Past treatment sought             | Have you received treatment for tinnitus in the past?                                                | Yes (1) , No (0)                         |
| Sounds can distract from tinnitus | How well can sounds around you distract you from your tinnitus or make the tinnitus less noticeable? | Fully (1), Partially (2), Not at all (3) |
| Hearing aid use                   | Do you wear hearing aid(s) or any other amplification devices?                                       | No (0), One ear (1), Both ears (2)       |
| Medication use                    | Do you currently take any medications?                                                               | Yes (1) , No (0)                         |

Table 2.4: Clinical factors

| Variable   | Questionnaire                        | Number of items/ Response options                                                          | Score                                                                                                                                                                                                                                                                                                                                                                  |
|------------|--------------------------------------|--------------------------------------------------------------------------------------------|------------------------------------------------------------------------------------------------------------------------------------------------------------------------------------------------------------------------------------------------------------------------------------------------------------------------------------------------------------------------|
| Anxiety    | General Anxiety Disorders (GAD-7)    | 7-items<br>4-point scale with “not at all” (score of 0) to “nearly every day” (score of 3) | Higher number indicates more severe anxiety (scores range between 0–21). The total score is interpreted as follows: <ul style="list-style-type: none"> <li>▪ 0–4: minimal anxiety</li> <li>▪ 5–9: mild anxiety</li> <li>▪ 10–14: moderate anxiety</li> <li>▪ 15–21: severe anxiety</li> </ul> Split into dichotomous variables ( $\leq 9$ no anxiety and $>9$ anxiety) |
| Depression | Patient Health Questionnaire (PHQ-9) | 9-items<br>4-point scale with “not at all” (score of                                       | Higher number indicates more severe depression (scores range between 0–27).                                                                                                                                                                                                                                                                                            |

|                    |                                                            |                                                                                                         |                                                                                                                                                                                                                                                                                                                                                                                                                                                                                        |
|--------------------|------------------------------------------------------------|---------------------------------------------------------------------------------------------------------|----------------------------------------------------------------------------------------------------------------------------------------------------------------------------------------------------------------------------------------------------------------------------------------------------------------------------------------------------------------------------------------------------------------------------------------------------------------------------------------|
|                    |                                                            | 0) to “nearly every day” (score of 3)                                                                   | <p>The total score is interpreted as follows:</p> <ul style="list-style-type: none"> <li>▪ 5–9: mild depression</li> <li>▪ 10–14: moderate</li> <li>▪ 15–19: moderately severe</li> <li>▪ 20–18: severe depression</li> </ul> <p>Split into dichotomous variables (<math>\leq 14</math> no depression and <math>&gt; 14</math> depression)</p>                                                                                                                                         |
| Insomnia           | Insomnia Severity Index (ISA)                              | <p>7-item</p> <p>5-point scale with “no problem” (score of 0) to “very severe problem” (score of 4)</p> | <p>Higher number indicates more severe insomnia (scores range between 0–28).</p> <p>The total score is interpreted as follows:</p> <ul style="list-style-type: none"> <li>▪ 0–7: not clinically significant</li> <li>▪ 8–14: subthreshold insomnia</li> <li>▪ 15–21: clinical insomnia (moderate severity)</li> <li>▪ 22–28: clinical insomnia (severe degree)</li> </ul> <p>Split into dichotomous variables (<math>\leq 14</math> no insomnia and <math>&gt; 15</math> insomnia)</p> |
| Hyperacusis        | Hyperacusis Questionnaire (HQ)                             | <p>14-items</p> <p>4-point scale with “no” (score of 0) to “yes, a lot” (score of 3)</p>                | <p>Higher number more severe hyperacusis (scores range between 0–42).</p> <p>The total score is interpreted as follows:</p> <ul style="list-style-type: none"> <li>▪ <math>&gt; 28</math>: strong hypersensitivity</li> </ul> <p>Split into dichotomous variables (<math>\leq 28</math> no hyperacusis and <math>&gt; 28</math> hyperacusis)</p>                                                                                                                                       |
| Hearing disability | Hearing Handicap Inventory for Adults – Screening (HHIA-S) | <p>10-items</p> <p>3-point scale with “yes” (score of 4) to “no” day (0)</p>                            | <p>Higher number more severe hearing disability (scores range between 0–40).</p> <p>The total score is interpreted as follows:</p> <ul style="list-style-type: none"> <li>▪ 0–8: no hearing disability</li> <li>▪ 10–24: mild to moderate hearing disability</li> <li>▪ 26–40: severe hearing disability</li> </ul> <p>Split into dichotomous variables (<math>\leq 8</math> no hearing disability and <math>\geq 10</math> hearing disability)</p>                                    |

|                    |                                        |                                                                                            |                                                                                                                                                                                                                                                                                                                                                                                                                                                                                                  |
|--------------------|----------------------------------------|--------------------------------------------------------------------------------------------|--------------------------------------------------------------------------------------------------------------------------------------------------------------------------------------------------------------------------------------------------------------------------------------------------------------------------------------------------------------------------------------------------------------------------------------------------------------------------------------------------|
| Cognitive failures | Cognitive Failures Questionnaire (CFQ) | 25-items<br><br>5-point scale with “never” (score of 0) to “very often” (score of 4)       | Higher scores indicate more difficulties (cognitive failures) in perception, memory, and motor function (score range 0–100).<br><br>The total score is interpreted as follows:<br>The scores range 0–100 with higher scores indicating more cognitive failures/problems (or reduced cognitive functioning).<br><br>Split into dichotomous variables (<=32 no cognitive problems and >32 cognitive problems)                                                                                      |
| Life satisfaction  | Satisfaction with Life Scale (SWLS)    | 5-items<br><br>7-point scale with “strongly disagree” (score of 1) to “strongly agree” (7) | Higher number indicated more satisfaction with life (scores range between 5–35).<br><br>The total score is interpreted as follows: <ul style="list-style-type: none"> <li>▪ 0–9: extremely dissatisfied</li> <li>▪ 10–14: dissatisfied</li> <li>▪ 15–19: below average satisfaction</li> <li>▪ 20–24: average satisfaction</li> <li>▪ 25–29: high satisfaction</li> <li>▪ 30–35: highly satisfied</li> </ul> Split into dichotomous variables (<=19 life satisfaction and >19 high satisfaction) |

### Appendix 3: Univariate analysis to examine association between predictor variables and outcome variable

Table 3.1: Participant demographic characteristics (n=228)

| Characteristic                                                        | N (%)     | Mean (SD)     |
|-----------------------------------------------------------------------|-----------|---------------|
| <b>Demographic characteristics</b>                                    |           |               |
| Age (in years)                                                        |           | 55.14 (12.92) |
| Gender                                                                |           |               |
| ▪ Female                                                              | 98 (43%)  |               |
| ▪ Male                                                                | 130 (57%) |               |
| Highest level of education                                            |           |               |
| ▪ High school or below                                                | 59 (26%)  |               |
| ▪ College                                                             | 47 (21%)  |               |
| ▪ Vocational training                                                 | 31 (13%)  |               |
| ▪ Bachelor's degree                                                   | 61 (26%)  |               |
| ▪ Masters degree or above                                             | 30 (13%)  |               |
| Employment                                                            |           |               |
| ▪ Manager                                                             | 27 (12%)  |               |
| ▪ Professional                                                        | 46 (20%)  |               |
| ▪ Technical                                                           | 16 (6%)   |               |
| ▪ Administrative                                                      | 17 (7%)   |               |
| ▪ Skilled tradesman                                                   | 11 (5%)   |               |
| ▪ Service occupation                                                  | 11 (5%)   |               |
| ▪ Medical                                                             | 6 (3%)    |               |
| ▪ Sales                                                               | 8 (3%)    |               |
| ▪ Homemaker                                                           | 4 (2%)    |               |
| ▪ Student                                                             | 1 (0%)    |               |
| ▪ Retired                                                             | 73 (32%)  |               |
| ▪ Unemployed                                                          | 11 (5%)   |               |
| Loud noise exposure                                                   |           |               |
| ▪ Yes                                                                 | 103 (45%) |               |
| ▪ No                                                                  | 125 (55%) |               |
| Diagnosed with a psychological condition                              |           |               |
| ▪ Yes                                                                 | 50 (22%)  |               |
| ▪ No                                                                  | 178 (78%) |               |
| Working less due to tinnitus                                          |           |               |
| ▪ Reduced hours                                                       | 8 (4%)    |               |
| ▪ Stopped work                                                        | 32 (14%)  |               |
| ▪ Disability allowance                                                | 7 (3%)    |               |
| ▪ No                                                                  | 181 (79%) |               |
| <b>Tinnitus and hearing-related characteristics</b>                   |           |               |
| Baseline tinnitus severity (measured using Tinnitus Functional Index) |           | 57.93 (19.17) |
| Tinnitus duration (in years)                                          |           | 17.68 (19.42) |
| How often tinnitus is heard                                           |           |               |



|                                                                                                                                                                                                                                                                                 |                                                                                                    |  |
|---------------------------------------------------------------------------------------------------------------------------------------------------------------------------------------------------------------------------------------------------------------------------------|----------------------------------------------------------------------------------------------------|--|
| <ul style="list-style-type: none"> <li>▪ Occasionally</li> <li>▪ When taking out my hearing aid(s)</li> <li>▪ At night</li> <li>▪ Most of the time</li> <li>▪ All the time</li> </ul>                                                                                           | 4 (2%)<br>3 (1%)<br>4 (2%)<br>63 (27%)<br>154 (68%)                                                |  |
| Tinnitus location <ul style="list-style-type: none"> <li>▪ One ear</li> <li>▪ Both ears</li> <li>▪ In my head</li> <li>▪ Other location</li> <li>▪ Unsure</li> </ul>                                                                                                            | 61 (27%)<br>109 (48%)<br>34 (15%)<br>3 (1%)<br>21 (9%)                                             |  |
| Type of tinnitus sound (answering Yes) <ul style="list-style-type: none"> <li>▪ Ringing</li> <li>▪ Buzzing</li> <li>▪ High pitched sound</li> <li>▪ Low pitched sound</li> <li>▪ Pulsating</li> <li>▪ Clicking</li> <li>▪ Music</li> <li>▪ Voices</li> <li>▪ Humming</li> </ul> | 71 (31%)<br>75 (33%)<br>130 (57%)<br>16 (7%)<br>28 (12%)<br>14 (6%)<br>4 (2%)<br>3 (1%)<br>21 (9%) |  |
| Multiple sounds heard <ul style="list-style-type: none"> <li>▪ Yes</li> <li>▪ No</li> </ul>                                                                                                                                                                                     | 73 (32%)<br>155 (68%)                                                                              |  |
| Presence of a hearing loss <ul style="list-style-type: none"> <li>▪ No</li> <li>▪ Both ears</li> <li>▪ One ear</li> <li>▪ Unsure</li> </ul>                                                                                                                                     | 49 (21%)<br>104 (46%)<br>46 (20%)<br>29 (13%)                                                      |  |
| <b>Treatment-related characteristics</b>                                                                                                                                                                                                                                        |                                                                                                    |  |
| Past tinnitus treatment sought <ul style="list-style-type: none"> <li>▪ Yes</li> <li>▪ No</li> </ul>                                                                                                                                                                            | 58 (25%)<br>170 (75%)                                                                              |  |
| Sounds can distract from tinnitus <ul style="list-style-type: none"> <li>▪ Fully</li> <li>▪ Partially</li> <li>▪ Not at all</li> </ul>                                                                                                                                          | 26 (11%)<br>178 (78%)<br>24 (10%)                                                                  |  |
| Hearing aid use <ul style="list-style-type: none"> <li>▪ No</li> <li>▪ Unilateral</li> <li>▪ Bilateral</li> </ul>                                                                                                                                                               | 159 (70%)<br>19 (8%)<br>50 (22%)                                                                   |  |
| Medication use <ul style="list-style-type: none"> <li>▪ Yes</li> <li>▪ No</li> </ul>                                                                                                                                                                                            | 130 (57%)<br>98 (43%)                                                                              |  |

Table 3.2: Univariate analysis with the Chi-square/ Fishers exact test results on the association between the demographic predictor categories and outcome variable (success as defined by a TFI-score changes  $\geq 13$  points or a failure). \*Indicates use of Fisher's exact test results due to less than 5 cases in subcategories.

| Predictor variable                    | Sub-Categories                  | Crude Odds Ratio (95% C.I) | P-Value           |
|---------------------------------------|---------------------------------|----------------------------|-------------------|
| Age                                   | >57 years                       | 1.00 (0.58, 1.73)          | 0.99              |
|                                       | $\leq 57$ years                 | Ref                        |                   |
| Gender                                | Female                          | 1.04 (0.60, 1.81)          | 0.88              |
|                                       | Male                            | Ref                        |                   |
| Education level                       | College                         | 0.72 (0.36, 1.68)          | <b>0.0085*</b>    |
|                                       | Vocational training             | 1.47 (0.65, 4.09)          |                   |
|                                       | Bachelor's degree               | 1.30 (0.68, 2.92)          |                   |
|                                       | <b>Master's degree or above</b> | <b>4.50 (1.59, 18.47)</b>  |                   |
|                                       | High school or less             | Ref                        |                   |
| Employment type                       | Professional                    | 0.70 (0.30, 2.10)          | 0.95*             |
|                                       | Technical                       | 0.47 (0.16, 2.20)          |                   |
|                                       | Administrative                  | 0.74 (0.26, 3.14)          |                   |
|                                       | Skilled tradesman               | 0.95 (0.29, 5.43)          |                   |
|                                       | Service occupation              | 0.95 (0.29, 5.43)          |                   |
|                                       | Medical                         | 1.18 (0.26, 13.47)         |                   |
|                                       | Sales                           | 0.38 (0.11, 2.35)          |                   |
|                                       | Home maker                      | 0.32 (0.08, 3.50)          |                   |
|                                       | Student                         | 0.47 (0.06, 41.55)         |                   |
|                                       | Retired                         | 0.99 (0.44, 2.78)          |                   |
|                                       | Unemployed                      | 0.95 (0.29, 5.43)          |                   |
|                                       | Manager                         | Ref                        |                   |
|                                       | Loud noise exposure             | Yes                        | 0.69 (0.40, 1.19) |
| No                                    |                                 | Ref                        |                   |
| Presence of a psychological condition | Yes                             | 1.64 (0.81, 3.30)          | 0.17              |
|                                       | No                              | Ref                        |                   |
| Work less due to tinnitus             | Reduced hours                   | 1.81 (0.44, 15.50)         | 0.37*             |
|                                       | Stopped work                    | 0.90 (0.45, 2.13)          |                   |
|                                       | Disability allowance            | 0.31 (0.10, 1.70)          |                   |
|                                       | No                              | Ref                        |                   |

Table 3.3: Univariate analysis with the Chi-square/ Fishers exact test results on the association between the tinnitus and hearing-related predictor categories and outcome variable (success as defined by a TFI-score changes  $\geq 13$  points or a failure). \*Indicates use of Fisher's exact test results due to less than 5 cases in subcategories.

| Predictor variable          | Sub-Categories                    | Crude Odds Ratio (95% C.I) | P-Value     |
|-----------------------------|-----------------------------------|----------------------------|-------------|
| Baseline tinnitus severity  | >55.2                             | <b>1.78 (1.02, 3.10)</b>   | <b>0.04</b> |
|                             | $\leq 55.2$                       | Ref                        |             |
| Tinnitus duration           | >10.00 years                      | 1.16 (0.66, 2.02)          | 0.6         |
|                             | $\leq 10.00$ years                | Ref                        |             |
| How often tinnitus is heard | When taking out my hearing aid(s) | 0.25 (0.04, 11.57)         | 0.12*       |
|                             | At night                          | 0.06 (0.01, 2.75)          |             |
|                             | Most of the time                  | 0.32 (0.08, 4.10)          |             |
|                             | All the time                      | 0.57 (0.14, 6.98)          |             |
| Tinnitus location           | Occasionally                      | Ref                        |             |
|                             | Both ears                         | 1.12 (0.62, 2.25)          | 0.95*       |
|                             | In my head                        | 1.13 (0.52, 2.98)          |             |
|                             | Unsure                            | 0.59 (0.13, 8.21)          |             |
| Tinnitus type: Ringing      | Other                             | 1.26 (0.51, 4.16)          |             |
|                             | One ear                           | Ref                        |             |
| Tinnitus type: Ringing      | Yes                               | 1.23 (0.68, 2.25)          | 0.49        |
|                             | No                                | Ref                        |             |
| Tinnitus type: Buzzing      | Yes                               | 1.39 (0.77, 2.52)          | 0.28        |
|                             | No                                | Ref                        |             |
| Tinnitus type: High pitch   | Yes                               | 0.75 (0.43, 1.32)          | 0.32        |
|                             | No                                | Ref                        |             |
| Tinnitus type: Low pitch    | Yes                               | 0.65 (0.23, 1.81)          | 0.40        |
|                             | No                                | Ref                        |             |
| Tinnitus type: Pulsing      | Yes                               | 0.66 (0.29, 1.47)          | 0.30        |
|                             | No                                | Ref                        |             |
| Tinnitus type: Clicking     | Yes                               | 0.36 (0.12, 1.09)          | 0.12        |
|                             | No                                | Ref                        |             |
| Tinnitus type: Music        | Yes                               | 1.57 (0.12, 83.52)         | 1.0*        |
|                             | No                                | Ref                        |             |
| Tinnitus type: Voices       | Yes                               | 0.00 (0.00, 1.24)          | 0.04        |
|                             | No                                | Ref                        |             |
| Tinnitus type: Humming      | Yes                               | 0.67 (0.27, 1.66)          | 0.53        |
|                             | No                                | Ref                        |             |
| Multiple tones heard        | Yes                               | 0.84 (0.47, 1.49)          | 0.54        |
|                             | No                                | Ref                        |             |
| Presence of a hearing loss  | Both ears                         | 0.92 (0.45, 1.88)          | 0.99        |
|                             | One ear                           | 0.91 (0.39, 2.13)          |             |
|                             | Unsure                            | 0.92 (0.35, 2.43)          |             |

|  |    |     |  |
|--|----|-----|--|
|  | No | Ref |  |
|--|----|-----|--|

Table 3.4: Univariate analysis with the Chi-square/ Fishers exact test results on the association between the treatment-related predictor categories and outcome variable (success as defined by a TFI-score changes  $\geq 13$  points or a failure). \*Indicates use of Fisher's exact test results due to less than 5 cases in subcategories.

| Predictor variable    | Sub-Categories | Crude Odds Ratio (95% C.I) | P-Value      |
|-----------------------|----------------|----------------------------|--------------|
| Past treatment sought | Yes            | 0.89 (0.48, 1.66)          | 0.71         |
|                       | No             | Ref                        |              |
| Sounds can distract   | Partially      | <b>2.97 (1.28, 6.88)</b>   | <b>0.027</b> |
|                       | Not at all     | <b>3.31 (1.02, 10.72)</b>  |              |
|                       | Fully          | Ref                        |              |
| Hearing aid use       | One ear        | <b>1.98 (0.71, 7.86)</b>   | <b>0.089</b> |
|                       | Both ear       | 0.60 (0.33, 1.21)          |              |
|                       | No             | Ref                        |              |
| Medication use        | Yes            | 1.22 (0.70, 2.11)          | 0.49         |
|                       | No             | Ref                        |              |

Table 3.5: Univariate analysis with the Chi-square/ Fishers exact test results on the association between the clinical factors predictor categories and outcome variable (success as defined by a TFI-score changes  $\geq 13$  points or a failure). \*Indicates use of Fisher's exact test results due to less than 5 cases in subcategories.

| Predictor variable  | Sub-Categories | Odds Ratio (95% C.I) | P-Value |
|---------------------|----------------|----------------------|---------|
| Anxiety             | Yes            | 1.09 (0.60, 1.98)    | 0.77    |
|                     | No             | Ref                  |         |
| Depression          | Yes            | 1.19 (0.49, 2.88)    | 0.69    |
|                     | No             | Ref                  |         |
| Insomnia            | Yes            | 0.86 (0.49, 1.50)    | 0.59    |
|                     | No             | Ref                  |         |
| Hyperacusis         | Yes            | 1.16 (0.54, 2.51)    | 0.71    |
|                     | No             | Ref                  |         |
| Hearing disability  | Yes            | 1.23 (0.69, 2.19)    | 0.49    |
|                     | No             | Ref                  |         |
| Cognitive functions | Yes            | 1.05 (0.60, 1.86)    | 0.86    |
|                     | No             | Ref                  |         |
| Life satisfaction   | Yes            | 0.69 (0.40, 1.22)    | 0.20    |
|                     | No             | Ref                  |         |

# BMJ Open

## Internet-based cognitive-behavioral therapy for tinnitus: Secondary analysis to examine predictors of outcomes

|                                 |                                                                                                                                                                                                                                                                                                                                                                                                                            |
|---------------------------------|----------------------------------------------------------------------------------------------------------------------------------------------------------------------------------------------------------------------------------------------------------------------------------------------------------------------------------------------------------------------------------------------------------------------------|
| Journal:                        | <i>BMJ Open</i>                                                                                                                                                                                                                                                                                                                                                                                                            |
| Manuscript ID                   | bmjopen-2021-049384.R1                                                                                                                                                                                                                                                                                                                                                                                                     |
| Article Type:                   | Original research                                                                                                                                                                                                                                                                                                                                                                                                          |
| Date Submitted by the Author:   | 13-Jun-2021                                                                                                                                                                                                                                                                                                                                                                                                                |
| Complete List of Authors:       | Rodrigo, Hansapani; The University of Texas Rio Grande Valley, School of Mathematical and Statistical Sciences<br>Beukes, Eldré; Lamar University, Department of Speech and Hearing Sciences; Anglia Ruskin University, Department of Speech<br>Andersson, Gerhard; Linköping University, Department of Behavioral Sciences and Learning<br>Manchaiah, Vinaya; Lamar University, Department of Speech and Hearing Sciences |
| <b>Primary Subject Heading</b>: | Ear, nose and throat/otolaryngology                                                                                                                                                                                                                                                                                                                                                                                        |
| Secondary Subject Heading:      | Ear, nose and throat/otolaryngology, Communication, Mental health, Patient-centred medicine, Research methods                                                                                                                                                                                                                                                                                                              |
| Keywords:                       | Audiology < OTOLARYNGOLOGY, Adult otolaryngology < OTOLARYNGOLOGY, Depression & mood disorders < PSYCHIATRY                                                                                                                                                                                                                                                                                                                |
|                                 |                                                                                                                                                                                                                                                                                                                                                                                                                            |

SCHOLARONE™  
Manuscripts



I, the Submitting Author has the right to grant and does grant on behalf of all authors of the Work (as defined in the below author licence), an exclusive licence and/or a non-exclusive licence for contributions from authors who are: i) UK Crown employees; ii) where BMJ has agreed a CC-BY licence shall apply, and/or iii) in accordance with the terms applicable for US Federal Government officers or employees acting as part of their official duties; on a worldwide, perpetual, irrevocable, royalty-free basis to BMJ Publishing Group Ltd ("BMJ") its licensees and where the relevant Journal is co-owned by BMJ to the co-owners of the Journal, to publish the Work in this journal and any other BMJ products and to exploit all rights, as set out in our [licence](#).

The Submitting Author accepts and understands that any supply made under these terms is made by BMJ to the Submitting Author unless you are acting as an employee on behalf of your employer or a postgraduate student of an affiliated institution which is paying any applicable article publishing charge ("APC") for Open Access articles. Where the Submitting Author wishes to make the Work available on an Open Access basis (and intends to pay the relevant APC), the terms of reuse of such Open Access shall be governed by a Creative Commons licence – details of these licences and which [Creative Commons](#) licence will apply to this Work are set out in our licence referred to above.

Other than as permitted in any relevant BMJ Author's Self Archiving Policies, I confirm this Work has not been accepted for publication elsewhere, is not being considered for publication elsewhere and does not duplicate material already published. I confirm all authors consent to publication of this Work and authorise the granting of this licence.

1  
2  
3 1 **Internet-based cognitive-behavioral therapy for tinnitus: Secondary analysis**  
4  
5  
6 2 **to examine predictors of outcomes**  
7  
8  
9 3

10  
11 4 **Hansapani Rodrigo,<sup>1</sup> Eldré W. Beukes,<sup>2,3</sup> Gerhard Andersson,<sup>4,5</sup> & Vinaya Manchaiah,<sup>2,6</sup>**  
12

- 13  
14 5 1. School of Mathematical and Statistical Sciences, University of Texas Rio Grande Valley,  
15  
16 6 Texas, USA  
17  
18 7 2. Department of Speech and Hearing Sciences, Lamar University, Beaumont, Texas, USA  
19  
20 8 3. Department of Vision and Hearing Sciences, School of Psychology and Sport Science,  
21  
22 9 Anglia Ruskin University, Cambridge, United Kingdom  
23  
24  
25 10 4. Department of Behavioural Sciences and Learning, Department of Biomedical and  
26  
27 11 Clinical Sciences, Linköping University, Linköping, Sweden  
28  
29 12 5. Department of Clinical Neuroscience, Division of Psychiatry, Karolinska Institute,  
30  
31 13 Stockholm, Sweden  
32  
33  
34 14 6. Department of Speech and Hearing, School of Allied Health Sciences, Manipal,  
35  
36 15 Karnataka, India  
37  
38  
39 16  
40

41 17 **Corresponding author:** Prof. Vinaya Manchaiah  
42

43 18 **Communication address:** Department of Speech and Hearing Sciences,  
44  
45  
46 19 Lamar University, Beaumont, Texas 77710, USA  
47

48 20 **Email:** [vinaya.manchaiah@lamar.edu](mailto:vinaya.manchaiah@lamar.edu)  
49

50 21 **Tel:** +1 (409) 880 8927  
51

52 22 **Fax:** +1 (409) 880 2265  
53  
54

55 23  
56  
57  
58  
59  
60

## 24 **Abstract**

25 **Objectives:** The current study examined predictors of outcomes of internet-based cognitive  
26 behavioural therapy (ICBT) for individuals with tinnitus.

27 **Design:** Secondary analysis of intervention studies.

28 **Setting:** Internet-based guided tinnitus intervention provided in the UK.

29 **Participants:** 228 individuals who underwent ICBT.

30 **Interventions:** ICBT.

31 **Primary and secondary outcome measures:** The key predictor variables included  
32 demographic, tinnitus, hearing-related, and treatment-related variables as well as clinical factors  
33 (i.e., anxiety, depression, insomnia, hyperacusis, hearing disability, cognitive function, and life  
34 satisfaction) which can have an impact on the treatment outcome. A 13-point reduction in  
35 Tinnitus Functional Index (TFI) scores has been defined as a successful outcome.

36 **Results:** Of the 228 subjects who were included in the study, 65% had a successful ICBT  
37 outcome. As per the univariate analysis, participants with a master's degree or above had the  
38 highest odds of having a larger reduction in tinnitus severity (OR: 3.47), compared to the  
39 participants who had education only up to high school or less. Additionally, the baseline tinnitus  
40 severity was found to be a significant variable (OR: 1.05) contributing to a successful outcome  
41 with the intervention. Both linear and logistic regression models have identified education level  
42 and baseline tinnitus severity, to be significant predictor variables contributing to reduction in  
43 tinnitus severity post-ICBT. As per linear regression model, participants who had received  
44 disability allowance had shown 25.3-point lower TFI reduction compared to those who didn't  
45 have to work less due to tinnitus after adjusting for baseline tinnitus severity and their education  
46 level.



1  
2  
3 47 **Conclusions:** Predictors of intervention outcome can be used as a means of triaging patients to  
4  
5 48 the most suited form of treatment to achieve optimal outcomes and to make healthcare savings.  
6  
7 49 Future studies should consider including a heterogeneous group of participants as well as other  
8  
9 50 predictor variables that might have not included in the current study.  
10  
11  
12  
13  
14

## 15 52 **Key Words**

16  
17 53 Tinnitus, Internet interventions, Digital therapeutics, Predictors of outcomes, Cognitive  
18  
19 54 behavioural therapy  
20  
21  
22  
23

## 24 56 **Strengths and limitations of the study**

- 25  
26  
27 57
  - This study investigated if there are predictors of outcomes for ICBT for tinnitus.
- 28  
29 58
  - Analysis included univariate, multivariable and logistic regression models.
- 30  
31 59
  - The results were hampered by homogeneity of the participants undertaking ICBT.
- 32  
33 60
  - Results may be biased by the sample size and number of predictors included in the
- 34  
35 61 model.  
36  
37  
38  
39  
40  
41  
42  
43  
44  
45  
46  
47  
48  
49  
50  
51  
52  
53  
54  
55  
56  
57  
58  
59  
60

## 66 Introduction

67 Tinnitus is the perception of sounds in the absence of external stimulation and is often heard as a  
68 ringing or buzzing meaningless sound(s). It is a very common condition, with at least 15% of the  
69 adult population having tinnitus.<sup>1</sup> Tinnitus is highly heterogeneous, both in the way it manifests  
70 as well as in the manner those with tinnitus respond to treatment options.<sup>2</sup> The National Study of  
71 Hearing in England found that of the general population surveyed ( $N = 48, 313$ ), 10.1% reported  
72 any tinnitus, 2.8% reported moderately annoying tinnitus, 1.6% reported severely annoying  
73 tinnitus, and 0.5% were unable to lead a normal life due to the severity of the tinnitus.<sup>1</sup>

74 Although there are several management strategies described in the literature, most are not  
75 evidence based. The main exception is Cognitive Behavioural Therapy (CBT), as indicated in  
76 various systematic reviews of randomized controlled trials.<sup>3-6</sup> Clinical practice guidelines, based  
77 on research evidence and expert consensus, thus recommends CBT as a management option for  
78 individuals with tinnitus and is supported by the American Academy of Otolaryngology-Head  
79 and Neck Surgery (AAO-HNS).<sup>7</sup>

80  
81 Despite positive and strong evidence for CBT, individuals with tinnitus are rarely offered CBT in  
82 their local clinics. For example, a large-scale epidemiological study in the US showed that  
83 medication (which is not recommended for tinnitus in clinical guidelines) was discussed 50% of  
84 the time by health professionals, whereas the CBT was discussed as a management option only  
85 0.2% of the time.<sup>8</sup> This is most likely a consequence of the limited number of trained  
86 professionals who provide CBT for tinnitus. One solution to overcome this issue is to use  
87 Internet-based CBT (ICBT), in which patients are provided with CBT in a self-help format over  
88 the internet with minimal guidance from a tinnitus expert.<sup>9</sup> A series of controlled studies in

1  
2  
3 89 Sweden, Germany, the United Kingdom, and the United States have demonstrated positive  
4  
5 90 effects of ICBT in reducing tinnitus distress as well as reducing its comorbidities such as anxiety,  
6  
7 91 depression, insomnia.<sup>9</sup> In addition to the changes noted in standardized outcome measures, the  
8  
9 92 qualitative analysis of user experiences has highlighted the perceived benefits of this program.<sup>10</sup>  
10  
11  
12 93 In addition, the improvements noted from ICBT have been maintained for 1-year post-  
13  
14 94 intervention.<sup>11</sup> . These results suggest that ICBT is a highly promising approach to provide  
15  
16 95 evidence-based tinnitus management.  
17  
18  
19 96

20  
21 97 Although the previous studies on ICBT have shown favourable results, they have mainly  
22  
23 98 reported group effects. There is limited understanding of who is likely to benefit (or not) from  
24  
25 99 the ICBT intervention. In other words, only a few studies have examined predictors of ICBT  
26  
27 100 outcomes in tinnitus research. For example, the long-term analysis of the previous UK studies  
28  
29 101 suggested that the best predictors of tinnitus improvements at 1-year were the baseline tinnitus  
30  
31 102 severity, engagement with ICBT program (i.e., more modules read), and higher self-reported  
32  
33 103 satisfaction with the intervention.<sup>11</sup> Studies in other health areas have also examined the  
34  
35 104 predictors of outcome for a range of internet-based health interventions.<sup>12-16</sup> These studies have  
36  
37 105 inconsistently identified various demographic as well as disease-specific variables that could  
38  
39 106 predict the successful and non-successful participants on internet interventions.<sup>16</sup> There remains  
40  
41 107 a clear gap in knowledge in terms of predictors of ICBT outcomes for tinnitus.  
42  
43  
44  
45  
46  
47 108

48  
49 109 Predictors of intervention outcomes may help triage patients to the most suitable tinnitus  
50  
51 110 intervention. If interventions are recommended based on their suitability, it can potentially  
52  
53 111 improve the outcomes, which would result in healthcare savings. The objective of the current  
54  
55  
56  
57  
58  
59  
60

1  
2  
3 112 study was to examine the predictors of outcomes of ICBT intervention for individuals with  
4  
5 113 tinnitus based on the secondary analysis of the pooled results from the three-phase clinical trial  
6  
7  
8 114 undertaken in the UK.  
9

10 115

## 116 **Method**

### 117 **Study design and participants**

118 A large data set was sought to identify predictors of outcome. Trials with similar methodologies  
119 were hence sought to merge to form a larger data set. Although a few previous studies regarding  
120 ICBT were conducted in Europe, these did not use extensive outcome measures. Following these  
121 trials, three trials were conducted in the UK, all using the same outcome measures. These trials  
122 were used due to a lack of other controlled trials available to pool data from. This present study  
123 thus formed a secondary analysis of data collected from three separate ICBT trials. Study  
124 participants from the three separate trials with different designs, including the single-group pre-  
125 post-test design,<sup>17</sup> an efficacy RCT design (Clinical Trials.gov: NCT02370810),<sup>18</sup> and an  
126 effectiveness RCT design (Clinical Trials.gov: NCT02665975)<sup>19</sup> were combined. These studies  
127 were conducted during 2016-18. In the efficacy trial, the experimental group underwent ICBT  
128 immediately after allocation whereas the control group underwent the same intervention  
129 following an 8-week weekly check-in period. In the effectiveness trial, the experimental group  
130 underwent the ICBT intervention whereas the control group underwent treatment as usual  
131 consisting of in-person tinnitus counselling and sound therapy, provided by the audiologists at  
132 three hospital settings. The data were collected from only those who underwent the ICBT  
133 intervention and were included in this study. The study team was granted access to the de-  
134 identified datasets, not containing any personally identifiable information, as part of a data

1  
2  
3 135 sharing policy. The ethical clearance for these studies was obtained from the Faculty of Science  
4  
5 136 and Technology Research Ethics Panel of Anglia Ruskin University (ARU reference:  
6  
7 137 FST/FREP/14/478 and FST/FREP/14/478) and the East of England–Cambridge South Research  
8  
9 138 Ethics Committee (REC reference: 16/EE/0148) and Health Research Authority (IRAS project  
10  
11 139 ID: 195565). The study results are presented using the TRIPOD checklist (see Supplementary  
12  
13  
14 140 file 1).

15  
16  
17 141  
18  
19 142 Combining the data from three trials resulted in the inclusion of 228 participants. Of these, 36  
20  
21 143 were from the pilot trial, 146 from the efficacy trial, and the remaining 46 were from the  
22  
23 144 effectiveness trial.

24  
25  
26 145

## 27 28 146 **Intervention**

29  
30  
31 147 The intervention included a CBT program that was specifically developed for individuals with  
32  
33 148 tinnitus.<sup>20</sup> This intervention was originally developed by psychologists in Sweden,<sup>21</sup> but later  
34  
35 149 adapted by audiologists in the UK<sup>22</sup> and the US.<sup>23</sup> The intervention was administered using a  
36  
37 150 secured ePlatform,<sup>24,25</sup> and presented in a self-help format. The intervention was presented over  
38  
39 151 an 8-weeks period, during which the users were given access to 2-3 modules each week. The  
40  
41 152 CBT program was divided into 21 modules, of which 5 were optional. The modules included  
42  
43 153 content such as applied relaxation, thought analysis, cognitive restructuring, imagery, and  
44  
45 154 exposure techniques. Each module included text, images, and videos to enhance the user  
46  
47 155 experience. In addition, they included various exercises that users have to complete to engage  
48  
49 156 them in the intervention. Although the intervention was presented in a self-help format, the users  
50  
51  
52  
53 157 had access to minimal guidance from an audiologist (EB). Generally, this included examining

1  
2  
3 158 weekly exercises users completed and providing feedback as well as answering any questions  
4  
5 159 they may have in the secured messaging system. An average of 10 minutes per participant was  
6  
7 160 spent on providing guidance and support, although some users required more support.  
8  
9

10 161

## 12 162 **Outcome measures**

14 163 The study participants completed an extensive pre-intervention questionnaire that collected data  
15  
16 164 on demographics, tinnitus-related and treatment-related history. In addition, participants also  
17  
18 165 completed various standardized patient-reported outcome measures (PROMs) at baseline (T0), at  
19  
20 166 post-intervention (T1) and 2-months follow-up (T2). The *primary outcome measure* included the  
21  
22 167 Tinnitus Functional Index (TFI)<sup>26</sup> to assess tinnitus severity/distress. This is a 25-item  
23  
24 168 questionnaire with scores ranging between 0 to 100. Scores below 25 indicate mild tinnitus with  
25  
26 169 no need for intervention, scores ranging between 25 to 50 indicate a significant problem with  
27  
28 170 possible need for intervention, and scores above 50 indicate severe enough tinnitus possibly  
29  
30 171 requiring a more intensive intervention. The TFI has good psychometric properties with  
31  
32 172 acceptable internal consistency (0.97) and test-retest reliability (0.8).<sup>26</sup>  
33  
34  
35  
36  
37

38 173

39  
40 174 The *secondary outcome measures* included the Insomnia Severity Index (ISI)<sup>27</sup> as a measure of  
41  
42 175 insomnia, the Generalized Anxiety Disorder (GAD-7)<sup>28</sup> as a measure of anxiety, the Patient  
43  
44 176 Health Questionnaire (PHQ-9)<sup>29</sup> as a measure of depression, the Hearing Handicap Inventory for  
45  
46 177 Adults Screening version (HHIA-S)<sup>30</sup> as a measure of self-reported hearing disability, the  
47  
48 178 Hyperacusis Questionnaire (HQ)<sup>31</sup> to assess the presence hyperacusis (i.e., reduced tolerance of  
49  
50 179 everyday sounds), the Cognitive Failures Questionnaire (CFQ)<sup>32</sup> was administered to assess  
51  
52  
53  
54  
55  
56  
57  
58  
59

180 cognitive functions, and the Satisfaction with Life Scales (SWLS)<sup>33</sup> to assess the global life  
181 satisfaction.

182

### 183 **Patient and public involvement**

184 As a secondary analysis, no patients were involved in these studies. The data originates for  
185 individuals with tinnitus who had previously received CBT delivered via the internet (i.e.,  
186 ICBT). As the same protocol was followed for all study participants and the all received the  
187 same intervention, merging this data was possible.

188

### 189 **Variables included in the predictive model**

190 **Outcome Variable:** The main dependent variable was the pre-and post-intervention change in  
191 tinnitus distress based on the TFI score (TFI change). The 13-point change in TFI scores,  
192 identified as a clinically meaningful (or significant) change by the original authors<sup>26</sup> was used to  
193 define a clinically significant intervention outcome.

194

### 195 **Predictor Variables:**

196 Predictor variables were selected, based on clinical reasoning and findings from previous studies  
197 by Beukes et al.<sup>11</sup> (see Supplementary file 2 for details). Thirty-two variables were selected as  
198 potential predictor (independent) variables and included demographic, tinnitus and hearing-  
199 related variables, tinnitus treatment related variables, clinical factors as follows:

200

- 1  
2  
3 201     ▪ Demographic variables (n=7): age (dichotomous), gender (dichotomous), education level  
4  
5 202           (ordinal), employment type (categorical), loud noise exposure (dichotomous), diagnosed  
6  
7 203           with a psychological condition (dichotomous), work less due to tinnitus (categorical).  
8  
9  
10 204     ▪ Tinnitus and hearing-related variables (n=15): baseline tinnitus severity (dichotomous),  
11  
12 205           tinnitus duration (dichotomous), how often tinnitus heard (ordinal), tinnitus location  
13  
14 206           (categorical), tinnitus types (9 different types, dichotomous), multiple tones heard  
15  
16 207           (dichotomous), and hearing loss (categorical).  
17  
18  
19 208     ▪ Treatment-related to tinnitus (n=4): past treatment sought (dichotomous), sounds can  
20  
21 209           distract from tinnitus (ordinal), hearing aid use (categorical), and medication use  
22  
23 210           (dichotomous).  
24  
25  
26 211     ▪ Clinical factors (n=7): anxiety (dichotomous), depression (dichotomous), insomnia  
27  
28 212           (dichotomous), hyperacusis (dichotomous), hearing disability (dichotomous), cognitive  
29  
30 213           functions (dichotomous), and life satisfaction (dichotomous).  
31  
32

### 33 214 34 35 215 **Data analysis**

36  
37 216 The data were analysed using descriptive statistics as well as univariate and multivariable linear  
38  
39 217 regression and logistic regression models. Linear models were used to identify the factors  
40  
41 218 affecting a significant TFI score change, while the logistic model was used to evaluate the factors  
42  
43 219 which specifically effects outcomes and was thus selected. There were 98 subjects who had all  
44  
45 220 their predictive variables except their post TFI scores. With the intention of preserving the power  
46  
47 221 of the analysis, we have retained those subjects in the analysis after applying the predictive mean  
48  
49 222 matching (PMM) data imputation.<sup>34</sup> Data imputation with PMM has been identified to be less  
50  
51  
52  
53  
54  
55  
56  
57  
58  
59  
60



1  
2  
3 223 vulnerable to model misspecification as, there is no need to define an explicit model for the  
4  
5 224 distribution of the missing values<sup>35</sup> with that.  
6  
7  
8 225

9  
10 226 The univariate analysis was performed using Chi-square or Fisher's exact test to examine the  
11  
12 227 effect of single variables on the ICBT outcome using all the variables. The multivariable  
13  
14 228 regression model was used to identify the effect of the variables on tinnitus reduction post ICBT,  
15  
16 229 while adjusting for the baseline tinnitus severity, as a variable previously identified to related to  
17  
18 230 the success of ICBT.<sup>11</sup> Prior to the multivariable analyses, the full data set was divided into the  
19  
20 231 training (80%,  $n = 183$ ) and testing (20%,  $n = 45$ ) to make a fair comparison among all the  
21  
22 232 predictive models. The training data set was used to develop the corresponding multivariable  
23  
24 233 regression models while the testing data set was used to evaluate the model predictions. Several  
25  
26 234 competing multivariable models (both linear and logistic) were examined. The best models were  
27  
28 235 selected based on the lowest mean squared error and the lowest Akaike Information Criterion  
29  
30 236 (AIC).<sup>36</sup> During multivariable analysis, we started off with the full model, including all the  
31  
32 237 predictor variables and used backward elimination based on AIC to select the final model. R  
33  
34 238 squared and Adj. R squared values has been reported as they are statistical measures of fit that  
35  
36 239 indicates how much variation of the outcome is explained by the predictor variable(s) in a linear  
37  
38 240 regression model.<sup>37</sup> We also reported the mean squared error as it is a better measure of  
39  
40 241 prediction accuracy. Both crude and model-based odds ratios were calculated and used to  
41  
42 242 evaluate the effect of the variable. The Hosmer-Lemeshow goodness-of-fit statistic was  
43  
44 243 calculated to assess the calibration of the final model.<sup>38</sup>  
45  
46  
47  
48  
49  
50

51 244  
52  
53  
54  
55  
56  
57  
58  
59  
60

1  
2  
3 245 The dependent variable TFI change was used as a continuous variable for a linear regression  
4  
5 246 analysis whereas the dichotomous variable (i.e., 13-point change yes or no) was used for logistic  
6  
7  
8 247 regression analysis. All statistical analyses were performed with R statistical software (Version:  
9  
10 248 3.6.3). All tests were two-sided and threshold at 5% level of significance.  
11

12 249

13  
14 250

15 251

## 16 17 18 19 252 **Results**

### 20 21 22 253 **Participant demographics**

23  
24 254 The mean age of study participants was 55.14 (SD: 12.92) years, and 57% of the subjects  
25  
26 255 ( $n=130$ ) were males. The mean tinnitus duration was 17.68 (SD: 19.42) years. Further details on  
27  
28  
29 256 demographic, tinnitus, hearing-related and treatment-related variables are provided in Table 1 of  
30  
31 257 the Supplementary file 3. Table 1 presents details on clinical variables. The mean baseline  
32  
33 258 tinnitus severity and tinnitus severity following the ICBT intervention were 57.93 (SD: 19.17)  
34  
35  
36 259 and 34.22 (SD: 22.76), respectively. Figure 1 presents the pre-and post-intervention tinnitus  
37  
38 260 severity (TFI) score variation, indicating statistically significant differences between these scores  
39  
40 261 ( $p < 0.001$ ) with the paired t-test. There were 148 participants (65%) with a 13-point or higher  
41  
42 262 reduction after the intervention.  
43

44  
45 26346  
47 264 <Table 1 here>48  
49 265 <Figure 1 here>50  
51  
52 266

### 53 54 267 **Univariate analysis to examine the predictors of ICBT outcome**

1  
2  
3 268 With the exception of education level ( $p = .01$ ), none of the demographic variables were  
4  
5 269 associated with post-intervention tinnitus severity change of 13-point or more. Participants with a  
6  
7 270 master's degree or above had the highest odds of having a larger severity change score, with an  
8  
9 271 odds ratio of 3.47 (95% CIs: 1.32, 12.51), compared to the participants who had education only  
10  
11 272 up to high school or less. In terms of tinnitus and hearing-related variables, the baseline tinnitus  
12  
13 273 severity ( $p = 0.001$ ) was significantly associated with treatment success. Participants who had a  
14  
15 274 higher baseline tinnitus severity (i.e., TFI scores of greater than or equal to 55.2) had significantly  
16  
17 275 higher odds of treatment success (OR: 2.65; 95% CIs: 1.50, 4.67) compared to those who had a  
18  
19 276 baseline severity less than 55.2. The details of the univariate analyses are provided in Tables 2-5  
20  
21 277 of the Supplementary file 3.  
22  
23  
24  
25

26 278  
27  
28 279 In terms of the treatment-related variables, sounds can distract ( $p = .001$ ) showed a significant  
29  
30 280 association with treatment success. Those who reported being distracted by the sound partially  
31  
32 281 (OR: 4.34; 95% CIs: 1.82, 10.34) or not at all (OR: 3.15; 95% CIs: 0.99, 10.00) were at higher  
33  
34 282 odds of having a successful treatment outcome when compared to who was fully distracted.  
35  
36 283 However, the odds among the participants who used hearing aid either in one ear or both ears  
37  
38 284 compared to those who did not, was not statistically significantly different with a  $p$ -value 0.26  
39  
40 285 (see Table 4 of the Supplementary file 3). Tinnitus described as voice-like had a 91% lower odds  
41  
42 286 of success with the treatment. None of the clinical factors were significantly associated with the  
43  
44 287 outcome.  
45  
46  
47  
48

49 288

50  
51 289 **Multivariable analyses to examine predictors of ICBT outcome**  
52  
53  
54  
55  
56  
57  
58  
59  
60

1  
2  
3 290 Working less due to tinnitus ( $p = .046$ ), baseline tinnitus severity ( $p < .001$ ), and education level  
4  
5 291 ( $p = .014$ ), showed significant associations ( $p$  with outcome (i.e., TFI reduction). Modified models  
6  
7 292 with the remaining variables were not statistically significant. Moreover, several two-way  
8  
9 293 interactions were tested. We did not find any gender interactions with regard to the maskability of  
10  
11 294 sounds ( $p = .87$ ) and) and hearing aid usage ( $p = .68$ ) variables. The overall model resulted with  
12  
13 295 an R squared = 0.35 and Adj. R squared of 0.20. The final model resulted in a root mean square of  
14  
15 296 22.81 on the testing data set. All required regression assumptions were satisfied with the selected  
16  
17 297 model. The final regression model (see Table 2) was selected with backward elimination based on  
18  
19 298 AIC.

20  
21  
22  
23 299 This model indicated that those who received disability allowance due to having severe tinnitus  
24  
25 300 and being unable to work, had shown a reduction of 25.30-point (95% CIs: -46.35,-4.24) in TFI  
26  
27 301 compared to those who did not have to work less due to tinnitus. Moreover, for every 10 unit  
28  
29 302 increase in the baseline tinnitus severity, there was 8.3 (95% CIs: 0.65,1.00) reduction in their  
30  
31 303 TFI score after adjusting for other variables. Participants who had master's degree or above  
32  
33 304 compared to participants who had a college education showed an expected reduction of 17-point  
34  
35 305 (95% CIs: 5.78, 27.84) in their TFI score.  
36  
37  
38  
39

40 306

41  
42 307 <Table 2 here>  
43

44 308

45  
46 309 Multivariable logistic regressions were performed next and indicated that baseline tinnitus  
47  
48 310 severity ( $p < 0.001$ ), and education level ( $p = .001$ ), and were identified as significant predictors  
49  
50 311 (see Table 3). This model had an AIC of 212.21. Modified models to the prior model indicated  
51  
52 312 that other variables were not statistically significant (see Table 4).  
53  
54  
55  
56  
57  
58  
59

1  
2  
3 313  
4  
5 314 The multivariable model adjusted OR (see Table 3) for the participants who had master's level  
6  
7  
8 315 or above education compared to those who had high school education or less also showed 9.65  
9  
10 316 higher odds (95% CIs: 2.32, 40.15) of having a successful outcome. Similar to the linear  
11  
12 317 regression model, baseline tinnitus severity had also shown a significant association (OR: 1.04;  
13  
14 318 95% CIs: 1.02, 1.06) with the treatment outcome. The Hosmer-Lemeshow goodness-of-fit test  
15  
16 319 confirmed a better fit in the current model with a  $p$ -value of 0.50 ( $\chi^2=7.36$ ,  $df=8$ ).  
17  
18

19 320

21 321 <Table 3 here>

23 322 <Table 4 here>

25 323

26  
27  
28 324 Fewer variables were statistically significant in the logistic regression model, which identified  
29  
30 325 influencing predictors of the ICBT success. This was due to the fact that the logistic regression  
31  
32 326 model evaluated predictors of treatment successes (i.e., 13 point change), while the multivariable  
33  
34 327 regression model identified the predictors of a significant TFI reduction.  
35  
36  
37

38 328

## 39 329 **Discussion**

40  
41  
42 330 Accessible and affordable tinnitus interventions are needed to alleviate tinnitus distress as well as  
43  
44 331 comorbid problems with anxiety, depression, and insomnia. The current study examined  
45  
46 332 predictors of outcomes for ICBT. In this exploratory study, only a limited number of variables  
47  
48 333 were identified as possibly reducing tinnitus severity scores on the TFI by at least 13 points  
49  
50 334 following undertaking an ICBT intervention and the results vary depending on the model used.  
51  
52  
53 335 Only educational level and baseline tinnitus severity were predictors in both linear and logistic  
54  
55  
56  
57  
58  
59  
60

1  
2  
3 336 models. Other variable that were significant in the linear regression models included the  
4  
5 337 demographic variable working less due to tinnitus, when controlling for baseline tinnitus severity  
6  
7 338 and education level. These key findings are discussed below.  
8  
9

10 339  
11  
12 340 In terms of demographic variables, education level was found to be a significant predictor of  
13  
14 341 ICBT success as those with a master's education or higher had higher odds of having a successful  
15  
16 342 outcome compared with those with high school education in both the linear and logistic models.  
17  
18 343 This was expected as having good literacy skills is essential when understanding the intervention  
19  
20 344 materials. The intervention materials used in these studies were written at an average of 9<sup>th</sup>  
21  
22 345 reading grade level,<sup>23</sup> suggesting that they were not easily accessible for participants with only a  
23  
24 346 high school education. These results highlight the importance of health literacy considerations  
25  
26 347 when developing text-based self-help interventions such as ICBT. Additionally, those reported to  
27  
28 348 be working less due to tinnitus were at a lower odds of having a successful outcome. This finding  
29  
30 349 needs further exploration in future studies. Working, may for instance provide some distraction  
31  
32 350 from tinnitus as supported by reports during the 2020 COVID-19 pandemic that tinnitus was more  
33  
34 351 bothersome for some individuals as they did not have the distractions from commuting and  
35  
36 352 sounds at work.<sup>39</sup> Closely monitoring the effects of tinnitus is important to ensure that tinnitus can  
37  
38 353 be managed so that individuals are still able to work effectively.  
39  
40  
41  
42  
43  
44

45 354  
46  
47 355 When examining the tinnitus and hearing-related variables, baseline tinnitus severity was found to  
48  
49 356 be a significant predictor of ICBT success, as seen in previous studies.<sup>11</sup> Tinnitus perceptions vary  
50  
51 357 greatly and in this study those with tinnitus presenting as musical, lower-pitched or clicking were  
52  
53 358 less likely to have a positive outcome of ICBT. This finding certainly needs further exploration as  
54  
55  
56  
57  
58  
59

1  
2  
3 359 the limited number of participants in each group of tinnitus perception. One of the CBT  
4  
5 360 intervention aims is to help participants to reinterpret their tinnitus to a less threatening sound. It  
6  
7 361 may be that these sounds are not easily likened to everyday sounds than other types of tinnitus  
8  
9  
10 362 (i.e., buzzing, high pitch, pulsing, humming) making it difficult to develop adaptation strategies.  
11

12 363  
13  
14 364 Of the four treatment-related variables, only those who reported to use of wearing one hearing aid  
15  
16 365 were found to be at better odds of ICBT success. This finding needs further exploration to identify  
17  
18 366 other characteristics that may be associated with an outcome such as having tinnitus in only one  
19  
20 367 ear. Although the evidence for the use of hearing aids alone for tinnitus management is  
21  
22 368 limited,<sup>40,41</sup> hearing aids may for some reduce the tinnitus percept and aid communication  
23  
24 369 difficulties.<sup>42</sup> Ensuring hearing loss is addressed in addition to the provision of ICBT may lead to  
25  
26 370 more optimal outcomes for those with co-existing hearing loss.  
27  
28  
29  
30

31 371  
32  
33 372 Regarding studying the clinical factors, those with higher levels of depression were found to have  
34  
35 373 higher reduction in the TFI score. However, the participants with insomnia showed lower odds of  
36  
37 374 success. Interestingly, other clinical factors including anxiety, hyperacusis, hearing disability as  
38  
39 375 well as cognitive functioning were not significant predictors of ICBT in the current study. Further  
40  
41 376 studies and models are required to verify these results.  
42  
43  
44

45 377  
46  
47 378 Studies in other health areas have also examined the predictors of a range of internet-based health  
48  
49 379 interventions.<sup>12-15</sup> Generally higher baseline symptoms predict increased treatment response, for  
50  
51 380 example, in anxiety and depression,<sup>43</sup> and higher obsessive-compulsive behaviours when treating  
52  
53 381 the obsessive-compulsive disorder.<sup>44</sup> Variables such as age and gender have been mentioned as  
54  
55  
56  
57  
58  
59

1  
2  
3 382 significant predictors for some ICBT interventions.<sup>15,43</sup> Most previous ICBT interventions have  
4  
5 383 not identified pre-treatment characteristics to predict or moderate outcomes.<sup>16</sup> Most ICBT studies  
6  
7 384 have indicated that ICBT works irrespective of treatment history.<sup>43</sup> Contrarily, previous treatment  
8  
9 385 has shown worse outcomes in some previous studies.<sup>45</sup> However, it may be that some participants  
10  
11 386 may have sought alternative therapies which have no evidence for tinnitus. For this reason, it  
12  
13 387 would be useful to examine specific types of previous treatments in future studies to distinguish  
14  
15 388 between those who had evidence-based interventions before enrolling to ICBT than those who did  
16  
17 389 not.  
18  
19  
20  
21  
22

390

### 391 **Study limitations and future research**

26 392 The current study was to our knowledge the first study to combine data from multiple studies to  
27  
28 393 examine the predictors of ICBT outcome for tinnitus. However, it has limitations. First, the study  
29  
30 394 may have included a homogeneous group of tinnitus patients due to study inclusion/exclusion  
31  
32 395 criteria and may not have included all the possible variables (e.g., health literacy, acceptability  
33  
34 396 and motivation of users, satisfaction from the intervention, intervention engagement) that may  
35  
36 397 have played a role in ICBT outcome. These factors were not investigated for this study. As they  
37  
38 398 have been found to contribute to outcomes,<sup>46</sup> they should be included in future studies. Second,  
39  
40 399 the sample size remained relatively small when compared to the number of predictive factors  
41  
42 400 included. Third, multivariable analyses may have some limitations in terms of examining complex  
43  
44 401 relationships. Moreover, due to the high multicollinearity between the predictor variables, there  
45  
46 402 were several competing models which had led to the same prediction accuracies and root mean  
47  
48 403 square errors. Additionally, these linear models lack in identifying any predictor variables that  
49  
50 404 have a non-linear relationship with the response variables. For these reasons, the study results  
51  
52  
53  
54  
55  
56  
57  
58  
59  
60



1  
2  
3 405 must be viewed as preliminary. Future studies may benefit from examining more relevant  
4  
5 406 predictor variables and also using artificial intelligence and machine learning techniques to  
6  
7 407 examine the non-linear relationship between the variables in predicting the ICBT outcomes. Brier  
8  
9 408 scores should also be used to compare models. Analyses should be extended with non-linear  
10  
11 409 models like decision trees, support vector machines and neural networks. Future studies could  
12  
13 410 also examine the predictors of adherence and engagement to intervention as well as of dropouts.  
14  
15  
16  
17  
18

### 19 412 **Funding**

20  
21  
22 413 This work was partially funded by the National Institute on Deafness and Communication  
23  
24 414 Disorders (NIDCD) of the National Institute of Health (NIH) under the award number  
25  
26 415 R21DC017214.  
27  
28

### 29 416 30 417 **Twitter**

31  
32 418 @VManchaiah, @Eldre7, @profGergardA  
33  
34  
35  
36  
37

### 38 420 **Contributors**

39  
40 421 HR, VM, EB and GA conceptualized the study. EB administered the intervention and collected  
41  
42 422 the data. HR performed the data analysis. VM and HR prepared the first draft of the manuscript.  
43  
44 423 All authors read and approved the final manuscript.  
45  
46  
47

### 48 424 49 425 **Competing interests**

50  
51 426 None to declare.  
52  
53  
54  
55  
56  
57  
58  
59  
60

1  
2  
3 428 **Patient consent for publication**  
4

5  
6 429 Not required.  
7

8 430  
9

10 431 **Data availability statement**  
11

12  
13 432 Data is available for other researchers on request.  
14

15 433  
16

17  
18 434 **References**  
19

- 20 435 1. Davis, A., & Refaie, A. E. (2020). The epidemiology of tinnitus. In R. Tyler (Ed.), *The*  
21  
22 436 *Handbook of Tinnitus* (pp. 1–23). Singular.  
23  
24 437 2. Cederroth, C. R., Gallus, S., Hall, D. A., Kleinjung, T., Langguth, B., Maruotti, A.,  
25  
26 438 Meyer, M., Norena, A., Probst, T., Pryss, R., Searchfield, G., Shekhawat, G.,  
27  
28 439 Spiliopoulou, M., Vanneste, S., & Schlee, W. (2019). Editorial: Towards an  
29  
30 440 Understanding of Tinnitus Heterogeneity. *Frontiers in Aging neuroscience, 11*, 53.  
31  
32 441 <https://doi.org/10.3389/fnagi.2019.00053>  
33  
34 442 3. Hesser, H., Weise, C., Westin, V. Z., & Andersson, G. (2011). A systematic review and  
35  
36 443 meta-analysis of randomized controlled trials of cognitive–behavioral therapy for tinnitus  
37  
38 444 distress. *Clinical Psychology Review, 31*(4), 545-553.  
39  
40 445 4. Hoare, D. J., Kowalkowski, V. L., Kang, S., & Hall, D. A. (2011). Systematic review and  
41  
42 446 meta-analyses of randomized controlled trials examining tinnitus management. *The*  
43  
44 447 *Laryngoscope, 121*(7), 1555-1564. doi: 10.1002/lary.21825.  
45  
46 448 5. Landry, E. C., Sandoval, X. C. R., Simeone, C. N., Tidball, G., Lea, J., & Westerberg, B.  
47  
48 449 D. (2020). Systematic review and network meta-analysis of cognitive and/or behavioral  
49  
50  
51  
52  
53  
54  
55  
56  
57  
58  
59  
60

- 1  
2  
3 450 therapies (CBT) for tinnitus. *Otology & Neurotology*, 41(2), 153-166. [https://doi:](https://doi.org/10.1097/MAO.0000000000002472)  
4  
5 451 10.1097/MAO.0000000000002472  
6  
7  
8 452 6. Fuller, T., Cima, R., Langguth, B., Mazurek, B., Vlaeyen, J.W.S., & Hoare, D.J. (2020).  
9  
10 453 Cognitive behavioural therapy for tinnitus. *Cochrane Database of Systematic Reviews*, 1,  
11  
12 454 CD012614. DOI: 10.1002/14651858.CD012614.pub2  
13  
14  
15 455 7. Tunkel, D. E., Bauer, C. A., Sun, G. H., Rosenfeld, R. M., Chandrasekhar, S. S.,  
16  
17 456 Cunningham, E. R., Jr, Archer, S. M., Blakley, B. W., Carter, J. M., Granieri, E. C.,  
18  
19 457 Henry, J. A., Hollingsworth, D., Khan, F. A., Mitchell, S., Monfared, A., Newman, C.  
20  
21 458 W., Omole, F. S., Phillips, C. D., Robinson, S. K., Taw, M. B., ... Whamond, E. J.  
22  
23 459 (2014). Clinical practice guideline: tinnitus. *Otolaryngology--head and neck surgery :  
24  
25 460 official journal of American Academy of Otolaryngology-Head and Neck Surgery*, 151(2  
26  
27 461 Suppl), S1–S40. <https://doi.org/10.1177/0194599814545325>  
28  
29  
30 462 8. Bhatt, J.M., Lin, H.W., & Bhattacharyya, N. (2016). Prevalence, severity, exposures, and  
31  
32 463 treatment patterns of tinnitus in the United States. *JAMA Otolaryngology–Head & Neck  
33  
34 464 Surgery*, 142 (10), 959-965. DOI: 10.1001/jamaoto.2016.1700  
35  
36  
37 465 9. Beukes, E. W., Manchaiah, V., Allen, P. M., Baguley, D. M., & Andersson, G. (2019).  
38  
39 466 Internet-based interventions for adults with hearing loss, tinnitus, and vestibular  
40  
41 467 disorders: A systematic review and meta-analysis. *Trends in Hearing*, 23,  
42  
43 468 2331216519851749. <https://doi.org/10.1177/2331216519851749>  
44  
45  
46 469 10. Beukes, E. W., Manchaiah, V., Davies, A. S., Allen, P. M., Baguley, D. M., &  
47  
48 470 Andersson, G. (2018c). Participants' experiences of an Internet-based cognitive  
49  
50 471 behavioral therapy intervention for tinnitus. *International Journal of Audiology*, 57(12),  
51  
52 472 947–954.  
53  
54  
55  
56  
57  
58  
59  
60

- 1  
2  
3 473 11. Beukes, E.W., Manchaiah, V., Baguley, D.M., Allen, P.M. & Andersson, G. (2018d).  
4  
5 474 Long-term efficacy of Audiologist-guided Internet-based Cognitive Behavior Therapy for  
6  
7 475 Tinnitus. *American Journal of Audiology*, 27(3S), 431-447. doi:10.1044/2018\_AJA-  
8  
9 IMIA3-18-0004  
10 476  
11  
12 477 12. Blankers, M., Koeter, M.W. & Schippers, G.M. (2013). Baseline predictors of treatment  
13  
14 478 outcome in Internet-based alcohol interventions: a recursive partitioning analysis  
15  
16 479 alongside a randomized trial. *BMC Public Health* 13, 455. [https://doi.org/10.1186/1471-](https://doi.org/10.1186/1471-2458-13-455)  
17  
18 480 2458-13-455  
19  
20  
21 481 13. Chen, H., Rodriguez, M. A., Qian, M., Kishimoto, T., Lin, M., & Berger, T. (2020).  
22  
23 482 Predictors of treatment outcomes and adherence in internet-based cognitive behavioral  
24  
25 483 therapy for social anxiety in China. *Behavioural and cognitive psychotherapy*, 48(3),  
26  
27 484 291–303. <https://doi.org/10.1017/S1352465819000730>  
28  
29  
30 485 14. Jonas B., Tensil M.-D., Leuschner F., Strüber E., & Tossmann P. (2019) Predictors of  
31  
32 486 treatment response in a web-based intervention for cannabis users. *Internet*  
33  
34 487 *Interv.* 2019;18:100261. doi: 10.1016/j.invent.2019.100261.  
35  
36  
37 488 15. Spek, V., Nyklíček, I., Cuijpers, P., & Pop, V. (2008). Predictors of outcome of group  
38  
39 489 and internet-based cognitive behavior therapy. *Journal of affective disorders*, 105(1-3),  
40  
41 490 137–145. <https://doi.org/10.1016/j.jad.2007.05.001>  
42  
43  
44 491 16. Andersson, G., Titov, N., Dear, B. F., Rozental, A., & Carlbring, P. (2019). Internet-  
45  
46 492 delivered psychological treatments: from innovation to implementation. *World*  
47  
48 493 *Psychiatry*, 18(1), 20-28. doi:10.1002/wps.20610  
49  
50  
51  
52  
53  
54  
55  
56  
57  
58  
59  
60

- 1  
2  
3 494 17. Beukes, E. W., Allen, P. M., Manchaiah, V., Baguley, D. M., & Andersson, G. (2017).  
4  
5 495 Internet-based intervention for tinnitus: Outcome of a single-group open trial. *American*  
6  
7 496 *Academy of Audiology*, 12(4), 340-351. doi:10.3766/jaaa.16055  
8  
9  
10 497 18. Beukes, E. W., Baguley, D. M., Allen, P. M., Manchaiah, V., & Andersson, G. (2018a).  
11  
12 498 Audiologist-guided Internet-based cognitive behavior therapy for adults with tinnitus in  
13  
14 499 the United Kingdom: A randomized controlled trial. *Ear and Hearing*, 39(3), 423–433.  
15  
16  
17 500 <https://doi.org/10.1097/AUD.0000000000000505>  
18  
19 501 19. Beukes, E. W., Andersson, G., Allen, P. M., Manchaiah, V., & Baguley, D. M. (2018b).  
20  
21 502 Effectiveness of guided Internet-based Cognitive Behavioral Therapy vs face-to-face  
22  
23 503 clinical care for treatment of tinnitus: A randomized clinical trial. *JAMA*  
24  
25 504 *Otolaryngology—Head & Neck Surgery*, 144(12), 1126–1133.  
26  
27 505 <https://doi.org/10.1001/jamaoto.2018.2238>  
28  
29  
30 506 20. Beukes, E., Andersson, G., Manchaiah, V., & Kaldo, V. (2021). *Cognitive behavioral*  
31  
32 507 *therapy for tinnitus*. San Diego, USA: Plural Publishing Inc.  
33  
34  
35 508 21. Andersson, G., Strömberg, T., Ström, T. & Lyttkens, L. (2002). Randomised controlled  
36  
37 509 trial of Internet based cognitive behavior therapy for distress associated with tinnitus.  
38  
39 510 *Psychosomatic Medicine*, 64, 810-816.  
40  
41  
42 511 22. Beukes, E. W., Vlaescu, G., Manchaiah, V., Baguley, D. M., Allen, P. M., Kaldo, V., &  
43  
44 512 Andersson, G. (2016). Development and technical functionality of an Internet-based  
45  
46 513 intervention for tinnitus in the UK. *Internet Interventions*, 6, 6–15.  
47  
48 514 <https://doi.org/10.1016/j.invent.2016.08.002>  
49  
50  
51 515 23. Beukes, E. W., Fagelson, M., Aronson, E. P., Munoz, M. F., Andersson, G., &  
52  
53 516 Manchaiah, V. (2020). Readability following cultural and linguistic adaptations of an  
54  
55  
56  
57  
58  
59  
60

- 1  
2  
3 517 Internet-based intervention for tinnitus for use in the United States. *American Journal of*  
4  
5 518 *Audiology*, 29(2), 97–109. [https://doi.org/10.1044/2019\\_AJA-19-00014](https://doi.org/10.1044/2019_AJA-19-00014)  
6  
7  
8 519 24. Vlaescu, G., Alasjö, A., Miloff, A., Carlbring, P., & Andersson, G. (2016). Features and  
9  
10 520 functionality of the Iterapi platform for Internet-based psychological treatment. *Internet*  
11  
12 521 *Interventions*, 6, 107–114. <https://doi.org/10.1016/j.invent.2016.09.006>  
13  
14  
15 522 25. Manchaiah, V., Vlaescu, G., Varadaraj, S., Aronson, E. P., Fagelson, M. A., Munoz, M.  
16  
17 523 F., Andersson, G., & Beukes, E. W. (2020). Features, Functionality, and Acceptability of  
18  
19 524 Internet-Based Cognitive Behavioral Therapy for Tinnitus in the United States. *American*  
20  
21 525 *Journal of Audiology*, 29(3), 476–490. [https://doi.org/10.1044/2020\\_AJA-20-00002](https://doi.org/10.1044/2020_AJA-20-00002)  
22  
23  
24 526 26. Meikle, M. B., Henry, J. A., Griest, S. E., et al. (2012). The tinnitus functional index:  
25  
26 527 development of a new clinical measure for chronic, intrusive tinnitus. *Ear Hear*, 33, 153–  
27  
28 528 176.  
29  
30  
31 529 27. Bastien, C. H., Vallieres, A., & Morin, C. M. (2001). Validation of the Insomnia Severity  
32  
33 530 Index as an outcome measure for insomnia research. *Sleep Med*, 2, 297–307.  
34  
35  
36 531 28. Spitzer, R. L., Kroenke, K., Williams, J. B., et al. (2006). A brief measure for assessing  
37  
38 532 generalized anxiety disorder: the GAD-7. *Arch Intern Med*, 166, 1092–1097.  
39  
40  
41 533 29. Spitzer, R. L., Kroenke, K., & Williams, J. B. (1999). Validation and utility of a self-  
42  
43 534 report version of PRIME-MD: the PHQ primary care study. *Primary Care Evaluation of*  
44  
45 535 *Mental Disorders. Patient Health Questionnaire. JAMA*, 282, 1737–1744.  
46  
47  
48 536 30. Newman, C. W., Weinstein, B. E., Jacobson, G. P., et al. (1991). Test-retest reliability of  
49  
50 537 the hearing handicap inventory for adults. *Ear Hear*, 12, 355–357.  
51  
52 538 31. Khalfa, S., Dubal, S., Vuillet, E., et al. (2002). Psychometric normalization of a  
53  
54 539 hyperacusis questionnaire. *ORL J Otorhinolaryngol Relat Spec*, 64, 436–442.  
55  
56  
57  
58  
59

- 1  
2  
3 540 32. Broadbent, D. E., Cooper, P. F., FitzGerald, P., et al. (1982). The Cognitive Failures  
4  
5 541 Questionnaire (CFQ) and its correlates. *Br J Clin Psychol*, 21 (Pt 1), 1–16.  
6  
7  
8 542 33. Diener, E., Emmons, R. A., Larsen, R. J., et al. (1985). The Satisfaction With Life Scale.  
9  
10 543 *J Pers Assess*, 49, 71–75.  
11  
12 544 34. Lodder, P. (2013). To impute or not impute: That’s the question. Advising on research  
13  
14 545 methods: Selected topics. Huizen: Johannes van Kessel Publishing.  
15  
16  
17 546 35. Little, R. J. A., & Rubin, D. B. (2002). *Statistical Analysis with Missing Data*. New  
18  
19 547 York: John Wiley & Sons.  
20  
21 548 36. Akaike, H. (1974). A new look at the statistical model identification. *IEEE Transactions*  
22  
23 549 *on Automatic Control*, 19 (6): 716–723  
24  
25  
26 550 37. Montgomery, D. C., Peck, E. A. & Vinning, G. G. (2012), *Introduction to Linear*  
27  
28 551 *Regression Analysis*, Wiley Series in Probability and Statistics  
29  
30  
31 552 38. Agresti, A. (2013) *Categorical Data Analysis*. 3rd Edition, John Wiley & Sons Inc.,  
32  
33 553 Hoboken.  
34  
35 554 39. Beukes, E. W., Baguley, D. M., Jacquemin, L., Lourenco, M., Allen, P. M., Onozuka, J.,  
36  
37 555 Stockdale, D., Kaldo, V., Andersson, G., & Manchaiah, V. (2020). Changes in Tinnitus  
38  
39 556 Experiences During the COVID-19 Pandemic. *Frontiers in public health*, 8, 592878.  
40  
41 557 <https://doi.org/10.3389/fpubh.2020.592878>  
42  
43  
44 558 40. Hoare, D. J., Edmondson-Jones, M., Sereda, M., Akeroyd, M. A., & Hall, D. (2014).  
45  
46 559 Amplification with hearing aids for patients with tinnitus and co-existing hearing  
47  
48 560 loss. *The Cochrane database of systematic reviews*, (1), CD010151.  
49  
50 561 <https://doi.org/10.1002/14651858.CD010151.pub2>  
51  
52  
53  
54  
55  
56  
57  
58  
59  
60

- 1  
2  
3 562 41. Shekhawat, G. S., Searchfield, G. D., & Stinear, C. M. (2013). Role of hearing AIDS in  
4  
5 563 tinnitus intervention: a scoping review. *Journal of the American Academy of*  
6  
7 564 *Audiology*, 24(8), 747–762. <https://doi.org/10.3766/jaaa.24.8.11>  
9  
10 565 42. Del Bo, L., & Ambrosetti, U. (2007). Hearing aids for the treatment of tinnitus. *Progress*  
11  
12 566 *in brain research*, 166, 341–345. [https://doi.org/10.1016/S0079-6123\(07\)66032-4](https://doi.org/10.1016/S0079-6123(07)66032-4)  
13  
14 567 43. Stjerneklar, S., Hougaard, E., & Thastum, M. (2019). Guided internet-based cognitive  
15  
16 568 behavioral therapy for adolescent anxiety: predictors of treatment response. *Internet*  
17  
18 569 *interventions*, 15, 116-125. <https://doi.org/10.1016/j.invent.2019.01.003>  
20  
21 570 44. Andersson, E., Ljótsson, B., Hedman, E., Enander, J., Kaldo, V., Andersson, G.,  
22  
23 571 Lindefors, N. and Rück, C. (2015). Predictors and moderators of Internet-based cognitive  
24  
25 572 behavior therapy for obsessive–compulsive disorder: Results from a randomized  
26  
27 573 trial. *Journal of Obsessive-Compulsive and Related Disorders*, 4: 1-7.  
28  
29 574 <https://doi.org/10.1016/j.jocrd.2014.10.003>  
31  
32 575 45. Andersson, G. (1997). Prior treatments in a group of tinnitus sufferers seeking treatment.  
33  
34 576 *Psychotherapy and Psychosomatics*, 66, 107-110.  
35  
36 577 46. Fuhr, K., Schröder, J., Berger, T., Moritz, S., Meyer, B., Lutz, W., Hohagen, F.,  
37  
38 578 Hautzinger, M., & Klein JP. (2018). The association between adherence and outcome in  
39  
40 579 an Internet intervention for depression. *Journal of Affective Disorders*, 229, 443-449. doi:  
41  
42 580 10.1016/j.jad.2017.12.028.  
43  
44  
45  
46  
47 581  
48  
49 582  
50  
51  
52  
53  
54  
55  
56  
57  
58  
59  
60



584 **Tables**585 **Table 1: Details of clinical variables of the study participants**

| Characteristic                                                              | Mean (SD)     |
|-----------------------------------------------------------------------------|---------------|
| Pre-intervention tinnitus severity (measured using TFI, scores range 0-11)  | 57.93 (19.17) |
| Post-intervention tinnitus severity (measured using TFI, scores range 0-11) | 34.22 (22.76) |
| 2-month follow up tinnitus severity (measured using TFI, scores range 0-11) | 34.23 (24.19) |
| Anxiety (measured using GAD-7, scores range 0-21)                           | 7.29 (5.52)   |
| Depression (measured using PHQ-9, scores range 0-27)                        | 7.61 (5.73)   |
| Insomnia (measured using ISI, scores range 0-28)                            | 12.49 (6.67)  |
| Hyperacusis (measured using HQ, scores range 0-40)                          | 18.33 (9.05)  |
| Hearing disability (measured using the HHIA-S, scores range 0-40)           | 16.18 (11.64) |
| Cognitive failures (measured using the CFQ, scores range 0-100)             | 38.54 (15.63) |
| Life satisfaction (measured using SWLS, scores range 0-40)                  | 20.71 (7.55)  |

586

587

589 **Table 2: The best multiple linear regression model summary**

590

| Predictor Variable                        | Estimate | 95% CI         | P-value           |
|-------------------------------------------|----------|----------------|-------------------|
| Intercept                                 | -28.94   | -41.70, -16.18 | <0.0000           |
| Work less: No                             | Ref      |                |                   |
| Work less: Reduced hours                  | -6.25    | -23.90, 11.39  | 0.48              |
| Work less: Stopped work                   | -0.58    | -10.52, 9.36   | 0.91              |
| Work less: Disability allowance           | -25.30   | -46.35, -4.24  | <b>0.02</b>       |
| Baseline tinnitus severity                | 0.83     | 0.65, 1.00     | <b>&lt;0.0001</b> |
| Education Level: High school or less      | Ref      |                |                   |
| Education Level: College                  | -2.25    | -12.61, 8.11   | 0.67              |
| Education Level: Vocational training      | 0.98     | -10.29, 12.25  | 0.86              |
| Education Level: Bachelor's degree        | 5.14     | -4.13, 14.42   | 0.28              |
| Education Level: Master's degree or above | 16.81    | 5.78, 27.84    | <b>0.003</b>      |

591

593 **Table 3: The multivariable logistic regression model summary and the model adjusted**  
 594 **odds ratio (95% confidence interval) for successful ICBT outcome of 13 points of higher.**

|                                           | Estimate | P-value           | Model based adjusted<br>OR (95% CI for OR) |
|-------------------------------------------|----------|-------------------|--------------------------------------------|
| Intercept                                 | -2.32    | 0.0005            | 0.10 (0.03, 0.37)                          |
| Baseline tinnitus severity                | 0.04     | <b>&lt; 0.001</b> | <b>1.04 (1.02, 1.06)</b>                   |
| Education level: High school or less      | Ref      |                   |                                            |
| Education level: College                  | -0.4     | 0.41              | 0.67 (0.26, 1.74)                          |
| Education level: Vocational training      | 0.41     | 0.47              | 1.49 (0.50, 4.48)                          |
| Education level: Bachelor's degree        | 0.68     | 0.14              | 1.98 (0.79, 4.98)                          |
| Education level: Master's degree or above | 2.27     | <b>0.001</b>      | <b>9.65 (2.32, 40.15)</b>                  |

596

598 **Table 4: Predictor variables which were insignificant in multivariable regression models**

599

|    |                           | <b>P-value</b>                               |                                                |
|----|---------------------------|----------------------------------------------|------------------------------------------------|
|    | <b>Predictor Variable</b> | <b>Multivariable Linear Regression Model</b> | <b>Multivariable Logistic Regression Model</b> |
| 1  | Gender                    | 0.47                                         | 0.83                                           |
| 2  | Hearing Loss              | 0.89                                         | 0.72                                           |
| 3  | Tinnitus type: Ringing    | 0.38                                         | 0.91                                           |
| 4  | Tinnitus type: Buzzing    | 0.43                                         | 0.53                                           |
| 5  | Tinnitus type: High pitch | 0.56                                         | 0.48                                           |
| 6  | Tinnitus type: Low pitch  | 0.33                                         | 0.46                                           |
| 7  | Tinnitus type: Pulsing    | 0.99                                         | 0.34                                           |
| 8  | Tinnitus type: Clicking   | 0.09                                         | 0.01                                           |
| 9  | Tinnitus type: Music      | 0.37                                         | 0.69                                           |
| 10 | Tinnitus type: Voices     | 0.34                                         | 0.09                                           |
| 11 | Tinnitus type: Humming    | 0.96                                         | 0.06                                           |
| 12 | Anxiety                   | 0.07                                         | 0.48                                           |
| 13 | Depression                | 0.76                                         | 0.86                                           |
| 14 | Insomnia                  | 0.94                                         | 0.53                                           |
| 15 | Hyperacusis               | 0.75                                         | 0.53                                           |
| 16 | Hearing disability        | 0.84                                         | 0.57                                           |
| 17 | Cognitive functions       | 0.71                                         | 0.72                                           |
| 18 | Life satisfaction         | 0.75                                         | 0.84                                           |

|    |                                       |               |      |
|----|---------------------------------------|---------------|------|
| 19 | Multiple tones heard                  | 0.26          | 0.81 |
| 20 | Loud noise exposure                   | 0.32          | 0.76 |
| 21 | Work less due to tinnitus             | Refer Table 2 | 0.46 |
| 22 | Presence of a psychological condition | 0.88          | 0.72 |
| 23 | Past treatment sought                 | 0.60          | 0.83 |
| 24 | Hearing aid use                       | 0.21          | 0.20 |
| 25 | Sounds can distract                   | 0.51          | 0.11 |
| 26 | Medication use                        | 0.73          | 0.87 |
| 27 | Tinnitus location                     | 0.50          | 0.27 |
| 28 | Employment type                       | 0.63          | 0.90 |
| 29 | Age                                   | 0.88          | 0.70 |
| 30 | Tinnitus Duration                     | 0.17          | 0.93 |
| 31 | How often tinnitus is heard           | 0.23          | 0.57 |

600

## 601 Figure Legends

602 **Figure 1: Tinnitus severity (TFI scores) pre- and post-intervention.** Boxplot represents the  
 603 five-number summary (minimum, first quartile, median, third quartile, and maximum). The thick  
 604 dark line represents the median.

605

1  
2  
3  
4  
5  
6  
7  
8  
9  
10  
11  
12  
13  
14  
15  
16  
17  
18  
19  
20  
21  
22  
23  
24  
25  
26  
27  
28  
29  
30  
31  
32  
33  
34  
35  
36  
37  
38  
39  
40  
41  
42  
43  
44  
45  
46  
47  
48  
49  
50  
51  
52  
53  
54  
55  
56  
57  
58  
59  
60

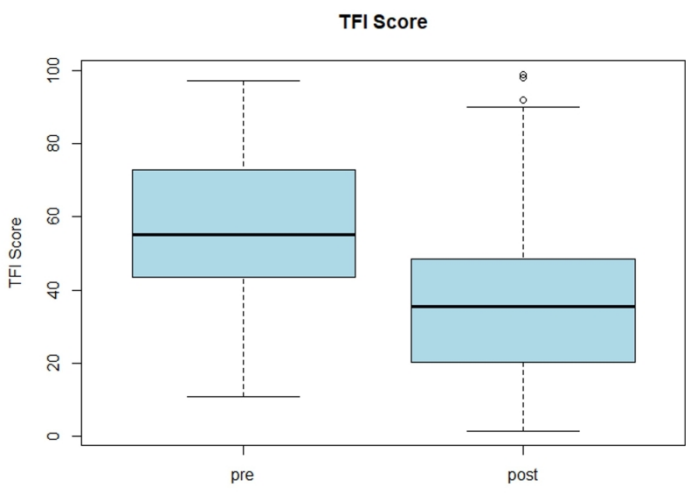

Figure 1

338x190mm (225 x 225 DPI)

## Supplementary File 1

Table 1: TRIPOD Checklist – Prediction model development

| Section/Topic                | Item | Checklist Item                                                                                                                                                                                        | Page  |
|------------------------------|------|-------------------------------------------------------------------------------------------------------------------------------------------------------------------------------------------------------|-------|
| <b>Title and abstract</b>    |      |                                                                                                                                                                                                       |       |
| Title                        | 1    | Identify the study as developing and/or validating a multivariable prediction model, the target population, and the outcome to be predicted.                                                          | 1     |
| Abstract                     | 2    | Provide a summary of objectives, study design, setting, participants, sample size, predictors, outcome, statistical analysis, results, and conclusions.                                               | 2     |
| <b>Introduction</b>          |      |                                                                                                                                                                                                       |       |
| Background and objectives    | 3a   | Explain the medical context (including whether diagnostic or prognostic) and rationale for developing or validating the multivariable prediction model, including references to existing models.      | 3-5   |
|                              | 3b   | Specify the objectives, including whether the study describes the development or validation of the model or both.                                                                                     | 5     |
| <b>Methods</b>               |      |                                                                                                                                                                                                       |       |
| Source of data               | 4a   | Describe the study design or source of data (e.g., randomized trial, cohort, or registry data), separately for the development and validation data sets, if applicable.                               | 6     |
|                              | 4b   | Specify the key study dates, including start of accrual; end of accrual; and, if applicable, end of follow-up.                                                                                        | 6     |
| Participants                 | 5a   | Specify key elements of the study setting (e.g., primary care, secondary care, general population) including number and location of centres.                                                          | 6     |
|                              | 5b   | Describe eligibility criteria for participants.                                                                                                                                                       | 6     |
|                              | 5c   | Give details of treatments received, if relevant.                                                                                                                                                     | 6-7   |
| Outcome                      | 6a   | Clearly define the outcome that is predicted by the prediction model, including how and when assessed.                                                                                                | 8-9   |
|                              | 6b   | Report any actions to blind assessment of the outcome to be predicted.                                                                                                                                | NA    |
| Predictors                   | 7a   | Clearly define all predictors used in developing or validating the multivariable prediction model, including how and when they were measured.                                                         | 8-9   |
|                              | 7b   | Report any actions to blind assessment of predictors for the outcome and other predictors.                                                                                                            | NA    |
| Sample size                  | 8    | Explain how the study size was arrived at.                                                                                                                                                            | 9     |
| Missing data                 | 9    | Describe how missing data were handled (e.g., complete-case analysis, single imputation, multiple imputation) with details of any imputation method.                                                  | 10    |
| Statistical analysis methods | 10a  | Describe how predictors were handled in the analyses.                                                                                                                                                 | 10    |
|                              | 10b  | Specify type of model, all model-building procedures (including any predictor selection), and method for internal validation.                                                                         | 10    |
|                              | 10d  | Specify all measures used to assess model performance and, if relevant, to compare multiple models.                                                                                                   | 10    |
| Risk groups                  | 11   | Provide details on how risk groups were created, if done.                                                                                                                                             | NA    |
| <b>Results</b>               |      |                                                                                                                                                                                                       |       |
| Participants                 | 13a  | Describe the flow of participants through the study, including the number of participants with and without the outcome and, if applicable, a summary of the follow-up time. A diagram may be helpful. | 11    |
|                              | 13b  | Describe the characteristics of the participants (basic demographics, clinical features, available predictors), including the number of participants with missing data for predictors and outcome.    | 11    |
| Model development            | 14a  | Specify the number of participants and outcome events in each analysis.                                                                                                                               | 11    |
|                              | 14b  | If done, report the unadjusted association between each candidate predictor and outcome.                                                                                                              | 11-12 |
| Model specification          | 15a  | Present the full prediction model to allow predictions for individuals (i.e., all regression coefficients, and model intercept or baseline survival at a given time point).                           | 12-15 |
|                              | 15b  | Explain how to use the prediction model.                                                                                                                                                              | 14-15 |
| Model performance            | 16   | Report performance measures (with CIs) for the prediction model.                                                                                                                                      | 14-15 |
| <b>Discussion</b>            |      |                                                                                                                                                                                                       |       |
| Limitations                  | 18   | Discuss any limitations of the study (such as nonrepresentative sample, few events per predictor, missing data).                                                                                      | 18-19 |
| Interpretation               | 19b  | Give an overall interpretation of the results, considering objectives, limitations, and results from similar studies, and other relevant evidence.                                                    | 15-18 |
| Implications                 | 20   | Discuss the potential clinical use of the model and implications for future research.                                                                                                                 | 19    |
| <b>Other information</b>     |      |                                                                                                                                                                                                       |       |
| Supplementary information    | 21   | Provide information about the availability of supplementary resources, such as study protocol, Web calculator, and data sets.                                                                         | 9, 11 |
| Funding                      | 22   | Give the source of funding and the role of the funders for the present study.                                                                                                                         | 19    |

## Supplementary File 2: Predictor Variables

Table 1: Demographic variables

| Variable                               | Question                                                                                              | Response options                                                                                                                                                                                     |
|----------------------------------------|-------------------------------------------------------------------------------------------------------|------------------------------------------------------------------------------------------------------------------------------------------------------------------------------------------------------|
| Age                                    | What is your age?                                                                                     | In years<br><br>Split into dichotomous variables ( $\leq 57$ years of age and $> 57$ years of age) based on the median                                                                               |
| Gender                                 | What is your gender?                                                                                  | Male (1), Female (2)                                                                                                                                                                                 |
| Education level                        | What is the highest level of education you have completed?                                            | Highschool or less (1), College (2), Vocational training (3), Bachelor's degree (4), Master's degree or above (5)                                                                                    |
| Employment type                        | What best describes your employment?                                                                  | Manager (1), Professional (2), Technical (3), Administrative (4), Skilled tradesman (5), Service occupation (6), Medical (7), Sales (8), Home maker (9), Student (10), Retired (11), Unemployed (12) |
| Loud noise exposure                    | Have you been exposed to loud noise?                                                                  | Yes (1) , No (0)                                                                                                                                                                                     |
| Diagnosed with psychological condition | Have you been presently diagnosed with any psychological conditions including anxiety and depression? | Yes (1) , No (0)                                                                                                                                                                                     |
| Work less due to tinnitus              | Do you work less because of your tinnitus?                                                            | No (0), Reduced hours (1), Stopped work (2), Disability allowance (3)                                                                                                                                |

Table 2: Tinnitus and hearing-related variables

| Variable                     | Question                                           | Response options                                                                                                     |
|------------------------------|----------------------------------------------------|----------------------------------------------------------------------------------------------------------------------|
| Baseline tinnitus severity   | Measured using the Tinnitus Functional Index (TFI) | Scores range from 0 to 100.<br><br>Split into dichotomous variables ( $\leq 55.2$ and $> 55.2$ ) based on the median |
| Tinnitus duration            | How long have you had tinnitus for?                | In years<br><br>Split into dichotomous variables ( $\leq 10.00$ years and $> 10.00$ years) based on the median       |
| How often is tinnitus heard? | How often is tinnitus heard?                       | Occasionally (1), When taking out my hearing aid(s) (2), At night (3), Most of the time (4), All the time (5)        |
| Tinnitus location            | Where do you notice your tinnitus?                 | One ear (1), Both ears (2), In my head (3), Unsure (4), Other (5)                                                    |



|                                      |                                                                                                                                                                                                                                        |                                                |
|--------------------------------------|----------------------------------------------------------------------------------------------------------------------------------------------------------------------------------------------------------------------------------------|------------------------------------------------|
| Type of tinnitus (9 different types) | <ul style="list-style-type: none"> <li>▪ Ringing</li> <li>▪ Buzzing</li> <li>▪ High pitched sound</li> <li>▪ Low pitched sound</li> <li>▪ Pulsing</li> <li>▪ Clicking</li> <li>▪ Music</li> <li>▪ Voices</li> <li>▪ Humming</li> </ul> | For each item: Yes (1) , No (0)                |
| Multiple tones heard                 | This variable is computed based on responses to types of tinnitus. Answer yes to multiple types of tinnitus was considered as multiple tones heard                                                                                     | Yes (1) , No (0)                               |
| Presence of a hearing loss           | Do you have a hearing loss?                                                                                                                                                                                                            | No (0), Both ears (1), One ear (2), Unsure (3) |

Table 3: Treatment-related variables

| Variable                          | Question                                                                                             | Response options                         |
|-----------------------------------|------------------------------------------------------------------------------------------------------|------------------------------------------|
| Past treatment sought             | Have you received treatment for tinnitus in the past?                                                | Yes (1) , No (0)                         |
| Sounds can distract from tinnitus | How well can sounds around you distract you from your tinnitus or make the tinnitus less noticeable? | Fully (1), Partially (2), Not at all (3) |
| Hearing aid use                   | Do you wear hearing aid(s) or any other amplification devices?                                       | No (0), One ear (1), Both ears (2)       |
| Medication use                    | Do you currently take any medications?                                                               | Yes (1) , No (0)                         |

Table 4: Clinical factors

| Variable   | Questionnaire                        | Number of items/<br>Response options                                                       | Score                                                                                                                                                                                                                                                                                                                                                                  |
|------------|--------------------------------------|--------------------------------------------------------------------------------------------|------------------------------------------------------------------------------------------------------------------------------------------------------------------------------------------------------------------------------------------------------------------------------------------------------------------------------------------------------------------------|
| Anxiety    | General Anxiety Disorders (GAD-7)    | 7-items<br>4-point scale with “not at all” (score of 0) to “nearly every day” (score of 3) | Higher number indicates more severe anxiety (scores range between 0–21). The total score is interpreted as follows: <ul style="list-style-type: none"> <li>▪ 0–4: minimal anxiety</li> <li>▪ 5–9: mild anxiety</li> <li>▪ 10–14: moderate anxiety</li> <li>▪ 15–21: severe anxiety</li> </ul> Split into dichotomous variables ( $\leq 9$ no anxiety and $>9$ anxiety) |
| Depression | Patient Health Questionnaire (PHQ-9) | 9-items<br>4-point scale with “not at all” (score of                                       | Higher number indicates more severe depression (scores range between 0–27).                                                                                                                                                                                                                                                                                            |

|                    |                                                            |                                                                                                         |                                                                                                                                                                                                                                                                                                                                                                                                                                                                                        |
|--------------------|------------------------------------------------------------|---------------------------------------------------------------------------------------------------------|----------------------------------------------------------------------------------------------------------------------------------------------------------------------------------------------------------------------------------------------------------------------------------------------------------------------------------------------------------------------------------------------------------------------------------------------------------------------------------------|
|                    |                                                            | 0) to “nearly every day” (score of 3)                                                                   | <p>The total score is interpreted as follows:</p> <ul style="list-style-type: none"> <li>▪ 5–9: mild depression</li> <li>▪ 10–14: moderate</li> <li>▪ 15–19: moderately severe</li> <li>▪ 20–18: severe depression</li> </ul> <p>Split into dichotomous variables (<math>\leq 14</math> no depression and <math>&gt; 14</math> depression)</p>                                                                                                                                         |
| Insomnia           | Insomnia Severity Index (ISA)                              | <p>7-item</p> <p>5-point scale with “no problem” (score of 0) to “very severe problem” (score of 4)</p> | <p>Higher number indicates more severe insomnia (scores range between 0–28).</p> <p>The total score is interpreted as follows:</p> <ul style="list-style-type: none"> <li>▪ 0–7: not clinically significant</li> <li>▪ 8–14: subthreshold insomnia</li> <li>▪ 15–21: clinical insomnia (moderate severity)</li> <li>▪ 22–28: clinical insomnia (severe degree)</li> </ul> <p>Split into dichotomous variables (<math>\leq 14</math> no insomnia and <math>&gt; 15</math> insomnia)</p> |
| Hyperacusis        | Hyperacusis Questionnaire (HQ)                             | <p>14-items</p> <p>4-point scale with “no” (score of 0) to “yes, a lot” (score of 3)</p>                | <p>Higher number more severe hyperacusis (scores range between 0–42).</p> <p>The total score is interpreted as follows:</p> <ul style="list-style-type: none"> <li>▪ <math>&gt; 28</math>: strong hypersensitivity</li> </ul> <p>Split into dichotomous variables (<math>\leq 28</math> no hyperacusis and <math>&gt; 28</math> hyperacusis)</p>                                                                                                                                       |
| Hearing disability | Hearing Handicap Inventory for Adults – Screening (HHIA-S) | <p>10-items</p> <p>3-point scale with “yes” (score of 4) to “no” day (0)</p>                            | <p>Higher number more severe hearing disability (scores range between 0–40).</p> <p>The total score is interpreted as follows:</p> <ul style="list-style-type: none"> <li>▪ 0–8: no hearing disability</li> <li>▪ 10–24: mild to moderate hearing disability</li> <li>▪ 26–40: severe hearing disability</li> </ul> <p>Split into dichotomous variables (<math>\leq 8</math> no hearing disability and <math>\geq 10</math> hearing disability)</p>                                    |

|                    |                                        |                                                                                            |                                                                                                                                                                                                                                                                                                                                                                                                                                                                                                  |
|--------------------|----------------------------------------|--------------------------------------------------------------------------------------------|--------------------------------------------------------------------------------------------------------------------------------------------------------------------------------------------------------------------------------------------------------------------------------------------------------------------------------------------------------------------------------------------------------------------------------------------------------------------------------------------------|
| Cognitive failures | Cognitive Failures Questionnaire (CFQ) | 25-items<br><br>5-point scale with “never” (score of 0) to “very often” (score of 4)       | Higher scores indicate more difficulties (cognitive failures) in perception, memory, and motor function (score range 0–100).<br><br>The total score is interpreted as follows:<br>The scores range 0–100 with higher scores indicating more cognitive failures/problems (or reduced cognitive functioning).<br><br>Split into dichotomous variables (<=32 no cognitive problems and >32 cognitive problems)                                                                                      |
| Life satisfaction  | Satisfaction with Life Scale (SWLS)    | 5-items<br><br>7-point scale with “strongly disagree” (score of 1) to “strongly agree” (7) | Higher number indicated more satisfaction with life (scores range between 5–35).<br><br>The total score is interpreted as follows: <ul style="list-style-type: none"> <li>▪ 0–9: extremely dissatisfied</li> <li>▪ 10–14: dissatisfied</li> <li>▪ 15–19: below average satisfaction</li> <li>▪ 20–24: average satisfaction</li> <li>▪ 25–29: high satisfaction</li> <li>▪ 30–35: highly satisfied</li> </ul> Split into dichotomous variables (<=19 life satisfaction and >19 high satisfaction) |

### Supplementary File 3: Univariate analysis to examine association between predictor variables and outcome variable

Table 1: Participant demographic characteristics (n=228)

| Characteristic                                                        | N (%)     | Mean (SD)     |
|-----------------------------------------------------------------------|-----------|---------------|
| <b>Demographic characteristics</b>                                    |           |               |
| Age (in years)                                                        |           | 55.14 (12.92) |
| Gender                                                                |           |               |
| ▪ Female                                                              | 98 (43%)  |               |
| ▪ Male                                                                | 130 (57%) |               |
| Highest level of education                                            |           |               |
| ▪ High school or below                                                | 59 (26%)  |               |
| ▪ College                                                             | 47 (21%)  |               |
| ▪ Vocational training                                                 | 31 (14%)  |               |
| ▪ Bachelor's degree                                                   | 61 (27%)  |               |
| ▪ Masters degree or above                                             | 30 (13%)  |               |
| Employment                                                            |           |               |
| ▪ Manager                                                             | 27 (12%)  |               |
| ▪ Professional                                                        | 46 (20%)  |               |
| ▪ Technical                                                           | 13 (6%)   |               |
| ▪ Administrative                                                      | 17 (7%)   |               |
| ▪ Skilled tradesman                                                   | 11 (5%)   |               |
| ▪ Service occupation                                                  | 11 (5%)   |               |
| ▪ Medical                                                             | 6 (3%)    |               |
| ▪ Sales                                                               | 8 (3%)    |               |
| ▪ Homemaker                                                           | 4 (2%)    |               |
| ▪ Student                                                             | 1 (0%)    |               |
| ▪ Retired                                                             | 73 (32%)  |               |
| ▪ Unemployed                                                          | 11 (5%)   |               |
| Loud noise exposure                                                   |           |               |
| ▪ Yes                                                                 | 103 (45%) |               |
| ▪ No                                                                  | 125 (55%) |               |
| Diagnosed with a psychological condition                              |           |               |
| ▪ Yes                                                                 | 50 (22%)  |               |
| ▪ No                                                                  | 178 (78%) |               |
| Working less due to tinnitus                                          |           |               |
| ▪ Reduced hours                                                       | 8 (4%)    |               |
| ▪ Stopped work                                                        | 32 (14%)  |               |
| ▪ Disability allowance                                                | 7 (3%)    |               |
| ▪ No                                                                  | 181 (79%) |               |
| <b>Tinnitus and hearing-related characteristics</b>                   |           |               |
| Baseline tinnitus severity (measured using Tinnitus Functional Index) |           | 57.93 (19.17) |
| Tinnitus duration (in years)                                          |           | 17.68 (19.42) |
| How often tinnitus is heard                                           |           |               |

|                                                                                                                                                                                                                                                                                        |                                                                                                                                           |  |
|----------------------------------------------------------------------------------------------------------------------------------------------------------------------------------------------------------------------------------------------------------------------------------------|-------------------------------------------------------------------------------------------------------------------------------------------|--|
| <ul style="list-style-type: none"> <li>▪ Occasionally</li> <li>▪ When taking out my hearing aid(s)</li> <li>▪ At night</li> <li>▪ Most of the time</li> <li>▪ All the time</li> </ul>                                                                                                  | <p>4 (2%)</p> <p>3 (1%)</p> <p>4 (2%)</p> <p>63 (27%)</p> <p>154 (68%)</p>                                                                |  |
| <p>Tinnitus location</p> <ul style="list-style-type: none"> <li>▪ One ear</li> <li>▪ Both ears</li> <li>▪ In my head</li> <li>▪ Other location</li> <li>▪ Unsure</li> </ul>                                                                                                            | <p>61 (27%)</p> <p>109 (48%)</p> <p>34 (15%)</p> <p>3 (1%)</p> <p>21 (9%)</p>                                                             |  |
| <p>Type of tinnitus sound (answering Yes)</p> <ul style="list-style-type: none"> <li>▪ Ringing</li> <li>▪ Buzzing</li> <li>▪ High pitched sound</li> <li>▪ Low pitched sound</li> <li>▪ Pulsating</li> <li>▪ Clicking</li> <li>▪ Music</li> <li>▪ Voices</li> <li>▪ Humming</li> </ul> | <p>71 (31%)</p> <p>75 (33%)</p> <p>130 (57%)</p> <p>16 (7%)</p> <p>28 (12%)</p> <p>14 (6%)</p> <p>4 (2%)</p> <p>3 (1%)</p> <p>21 (9%)</p> |  |
| <p>Multiple sounds heard</p> <ul style="list-style-type: none"> <li>▪ Yes</li> <li>▪ No</li> </ul>                                                                                                                                                                                     | <p>73 (32%)</p> <p>155 (68%)</p>                                                                                                          |  |
| <p>Presence of a hearing loss</p> <ul style="list-style-type: none"> <li>▪ No</li> <li>▪ Both ears</li> <li>▪ One ear</li> <li>▪ Unsure</li> </ul>                                                                                                                                     | <p>49 (21%)</p> <p>104 (46%)</p> <p>46 (20%)</p> <p>29 (13%)</p>                                                                          |  |
| <b>Treatment-related characteristics</b>                                                                                                                                                                                                                                               |                                                                                                                                           |  |
| <p>Past tinnitus treatment sought</p> <ul style="list-style-type: none"> <li>▪ Yes</li> <li>▪ No</li> </ul>                                                                                                                                                                            | <p>58 (25%)</p> <p>170 (75%)</p>                                                                                                          |  |
| <p>Sounds can distract from tinnitus</p> <ul style="list-style-type: none"> <li>▪ Fully</li> <li>▪ Partially</li> <li>▪ Not at all</li> </ul>                                                                                                                                          | <p>26 (11%)</p> <p>178 (78%)</p> <p>24 (10%)</p>                                                                                          |  |
| <p>Hearing aid use</p> <ul style="list-style-type: none"> <li>▪ No</li> <li>▪ Unilateral</li> <li>▪ Bilateral</li> </ul>                                                                                                                                                               | <p>159 (70%)</p> <p>19 (8%)</p> <p>50 (22%)</p>                                                                                           |  |
| <p>Medication use</p> <ul style="list-style-type: none"> <li>▪ Yes</li> <li>▪ No</li> </ul>                                                                                                                                                                                            | <p>130 (57%)</p> <p>98 (43%)</p>                                                                                                          |  |

Table 2: Univariate analysis with the Chi-square/ Fishers exact test results on the association between the demographic predictor categories and outcome variable (success as defined by a TFI-score changes  $\geq 13$  points or a failure). \*Indicates use of Fisher's exact test results due to less than 5 cases in subcategories.

| Predictor variable                    | Sub-Categories                  | Crude Odds Ratio (95% CIs) | P-Value      |
|---------------------------------------|---------------------------------|----------------------------|--------------|
| Age                                   | >57 years                       | 0.85 (0.50, 1.47)          | 0.57         |
|                                       | $\leq 57$ years                 | Ref                        |              |
| Gender                                | Female                          | 1.12 (0.64, 1.94)          | 0.70         |
|                                       | Male                            | Ref                        |              |
| Education level                       | College                         | 0.61 (0.31, 1.42)          | <b>0.01*</b> |
|                                       | Vocational training             | 1.70 (0.75, 4.88)          |              |
|                                       | Bachelor's degree               | 1.30 (0.67, 2.92)          |              |
|                                       | <b>Master's degree or above</b> | <b>3.47 (1.32, 12.51)</b>  |              |
|                                       | High school or less             | Ref                        |              |
| Employment type                       | Professional                    | 0.59 (0.25, 1.82)          | 0.95*        |
|                                       | Technical                       | 0.40 (0.13, 1.89)          |              |
|                                       | Administrative                  | 0.40 (0.14, 1.66)          |              |
|                                       | Skilled tradesman               | 0.56 (0.18, 3.00)          |              |
|                                       | Service occupation              | 0.80 (0.24, 4.66)          |              |
|                                       | Medical                         | 1.00 (0.22, 11.54)         |              |
|                                       | Sales                           | 0.80 (0.21, 6.00)          |              |
|                                       | Home maker                      | 0.27 (0.06, 3.00)          |              |
|                                       | Student                         | 0.40 (0.05, 35.47)         |              |
|                                       | Retired                         | 0.74 (0.32, 2.12)          |              |
|                                       | Unemployed                      | 0.80 (0.24, 4.66)          |              |
|                                       | Manager                         | Ref                        |              |
| Loud noise exposure                   | Yes                             | 0.80 (0.46, 1.38)          | 0.43         |
|                                       | No                              | Ref                        |              |
| Presence of a psychological condition | Yes                             | 1.72 (0.85, 3.46)          | 0.13         |
|                                       | No                              | Ref                        |              |
| Work less due to tinnitus             | Reduced hours                   | 1.05 (0.31, 6.18)          | 0.89*        |
|                                       | Stopped work                    | 0.81 (0.41, 1.89)          |              |
|                                       | Disability allowance            | 0.53 (0.16, 2.88)          |              |
|                                       | No                              | Ref                        |              |

Table 3: Univariate analysis with the Chi-square/ Fishers exact test results on the association between the tinnitus and hearing-related predictor categories and outcome variable (success as defined by a TFI-score changes  $\geq 13$  points or a failure). \*Indicates use of Fisher's exact test results due to less than 5 cases in subcategories.

| Predictor variable          | Sub-Categories                    | Crude Odds Ratio (95% CIs) | P-Value      |
|-----------------------------|-----------------------------------|----------------------------|--------------|
| Baseline tinnitus severity  | >55.2                             | <b>2.65 (1.50, 4.67)</b>   | <b>0.001</b> |
|                             | $\leq 55.2$                       | Ref                        |              |
| Tinnitus duration           | >10.00 years                      | 1.16 (0.66, 2.02)          | 0.60         |
|                             | $\leq 10.00$ years                | Ref                        |              |
| How often tinnitus is heard | When taking out my hearing aid(s) | 0.67 (0.02, 18.06)         | 0.19*        |
|                             | At night                          | 0.33 (0.02, 6.65)          |              |
|                             | Most of the time                  | 0.39 (0.04, 3.96)          |              |
|                             | All the time                      | 0.76 (0.08, 7.49)          |              |
|                             | Occasionally                      | Ref                        |              |
| Tinnitus location           | Both ears                         | 1.41(0.48, 4.16)           | 0.90*        |
|                             | In my head                        | 0.94 (0.48, 1.80)          |              |
|                             | Unsure                            | 1.35 (0.55, 3.34)          |              |
|                             | Other                             | 1.13 (0.10,13.16)          |              |
|                             | One ear                           | Ref                        |              |
| Tinnitus type: Ringing      | Yes                               | 1.30 (0.72, 2.37)          | 0.38         |
|                             | No                                | Ref                        |              |
| Tinnitus type: Buzzing      | Yes                               | 1.34 (0.74, 2.42)          | 0.32         |
|                             | No                                | Ref                        |              |
| Tinnitus type: High pitch   | Yes                               | 0.76 (0.44, 1.33)          | 0.34         |
|                             | No                                | Ref                        |              |
| Tinnitus type: Low pitch    | Yes                               | 0.89 (0.31, 2.56)          | 0.83         |
|                             | No                                | Ref                        |              |
| Tinnitus type: Pulsing      | Yes                               | 0.97 (0.42, 2.21)          | 0.94         |
|                             | No                                | Ref                        |              |
| Tinnitus type: Clicking     | Yes                               | 0.52 (0.17, 1.53)          | 0.23         |
|                             | No                                | Ref                        |              |
| Tinnitus type: Music        | Yes                               | 1.63 (0.17, 15.98)         | 1.00*        |
|                             | No                                | Ref                        |              |
| Tinnitus type: Voices       | Yes                               | 0.09 (0.00, 1.75)          | 0.04*        |
|                             | No                                | Ref                        |              |
| Tinnitus type: Humming      | Yes                               | 0.56 (0.23, 1.39)          | 0.21         |
|                             | No                                | Ref                        |              |
| Multiple tones heard        | Yes                               | 1.15 (0.64, 2.08)          | 0.63         |
|                             | No                                | Ref                        |              |
| Presence of a hearing loss  | Both ears                         | 1.20 (0.59, 2.41)          | 0.92         |
|                             | One ear                           | 1.19 (0.51, 2.74)          |              |
|                             | Unsure                            | 1.41 (0.53, 3.73)          |              |
|                             | No                                | Ref                        |              |

Table 4: Univariate analysis with the Chi-square/ Fishers exact test results on the association between the treatment-related predictor categories and outcome variable (success as defined by a TFI-score changes  $\geq 13$  points or a failure). \*Indicates use of Fisher's exact test results due to less than 5 cases in subcategories.

| Predictor variable    | Sub-Categories | Crude Odds Ratio (95% CIs) | P-Value      |
|-----------------------|----------------|----------------------------|--------------|
| Past treatment sought | Yes            | 0.94 (0.50, 1.74)          | 0.83         |
|                       | No             | Ref                        |              |
| Sounds can distract   | Partially      | <b>4.34 (1.82, 10.34)</b>  | <b>0.001</b> |
|                       | Not at all     | <b>3.15 (0.99, 10.00)</b>  |              |
|                       | Fully          | Ref                        |              |
| Hearing aid use       | One ear        | <b>1.57 (0.61, 5.49)</b>   | <b>0.26</b>  |
|                       | Both ear       | 0.69 (0.38, 1.39)          |              |
|                       | No             | Ref                        |              |
| Medication use        | Yes            | 1.22 (0.71, 2.12)          | 0.46         |
|                       | No             | Ref                        |              |

Table 5: Univariate analysis with the Chi-square/ Fishers exact test results on the association between the clinical factors predictor categories and outcome variable (success as defined by a TFI-score changes  $\geq 13$  points or a failure). \*Indicates use of Fisher's exact test results due to less than 5 cases in subcategories.

| Predictor variable  | Sub-Categories | Odds Ratio (95% CIs) | P-Value |
|---------------------|----------------|----------------------|---------|
| Anxiety             | Yes            | 1.53 (0.83, 2.82)    | 0.17    |
|                     | No             | Ref                  |         |
| Depression          | Yes            | 1.54 (0.62, 3.83)    | 0.35    |
|                     | No             | Ref                  |         |
| Insomnia            | Yes            | 1.27 (0.72, 2.23)    | 0.41    |
|                     | No             | Ref                  |         |
| Hyperacusis         | Yes            | 1.21 (0.56, 2.63)    | 0.62    |
|                     | No             | Ref                  |         |
| Hearing disability  | Yes            | 1.37 (0.77, 2.43)    | 0.28    |
|                     | No             | Ref                  |         |
| Cognitive functions | Yes            | 0.99 (0.56, 1.74)    | 0.97    |
|                     | No             | Ref                  |         |
| Life satisfaction   | Yes            | 0.76 (0.44, 1.33)    | 0.34    |
|                     | No             | Ref                  |         |



# BMJ Open

## Internet-based cognitive-behavioral therapy for tinnitus: Secondary analysis to examine predictors of outcomes

|                                 |                                                                                                                                                                                                                                                                                                                                                                                                                            |
|---------------------------------|----------------------------------------------------------------------------------------------------------------------------------------------------------------------------------------------------------------------------------------------------------------------------------------------------------------------------------------------------------------------------------------------------------------------------|
| Journal:                        | <i>BMJ Open</i>                                                                                                                                                                                                                                                                                                                                                                                                            |
| Manuscript ID                   | bmjopen-2021-049384.R2                                                                                                                                                                                                                                                                                                                                                                                                     |
| Article Type:                   | Original research                                                                                                                                                                                                                                                                                                                                                                                                          |
| Date Submitted by the Author:   | 31-Jul-2021                                                                                                                                                                                                                                                                                                                                                                                                                |
| Complete List of Authors:       | Rodrigo, Hansapani; The University of Texas Rio Grande Valley, School of Mathematical and Statistical Sciences<br>Beukes, Eldré; Lamar University, Department of Speech and Hearing Sciences; Anglia Ruskin University, Department of Speech<br>Andersson, Gerhard; Linköping University, Department of Behavioral Sciences and Learning<br>Manchaiah, Vinaya; Lamar University, Department of Speech and Hearing Sciences |
| <b>Primary Subject Heading</b>: | Ear, nose and throat/otolaryngology                                                                                                                                                                                                                                                                                                                                                                                        |
| Secondary Subject Heading:      | Ear, nose and throat/otolaryngology, Communication, Mental health, Patient-centred medicine, Research methods                                                                                                                                                                                                                                                                                                              |
| Keywords:                       | Audiology < OTOLARYNGOLOGY, Adult otolaryngology < OTOLARYNGOLOGY, Depression & mood disorders < PSYCHIATRY                                                                                                                                                                                                                                                                                                                |
|                                 |                                                                                                                                                                                                                                                                                                                                                                                                                            |

SCHOLARONE™  
Manuscripts



I, the Submitting Author has the right to grant and does grant on behalf of all authors of the Work (as defined in the below author licence), an exclusive licence and/or a non-exclusive licence for contributions from authors who are: i) UK Crown employees; ii) where BMJ has agreed a CC-BY licence shall apply, and/or iii) in accordance with the terms applicable for US Federal Government officers or employees acting as part of their official duties; on a worldwide, perpetual, irrevocable, royalty-free basis to BMJ Publishing Group Ltd ("BMJ") its licensees and where the relevant Journal is co-owned by BMJ to the co-owners of the Journal, to publish the Work in this journal and any other BMJ products and to exploit all rights, as set out in our [licence](#).

The Submitting Author accepts and understands that any supply made under these terms is made by BMJ to the Submitting Author unless you are acting as an employee on behalf of your employer or a postgraduate student of an affiliated institution which is paying any applicable article publishing charge ("APC") for Open Access articles. Where the Submitting Author wishes to make the Work available on an Open Access basis (and intends to pay the relevant APC), the terms of reuse of such Open Access shall be governed by a Creative Commons licence – details of these licences and which [Creative Commons](#) licence will apply to this Work are set out in our licence referred to above.

Other than as permitted in any relevant BMJ Author's Self Archiving Policies, I confirm this Work has not been accepted for publication elsewhere, is not being considered for publication elsewhere and does not duplicate material already published. I confirm all authors consent to publication of this Work and authorise the granting of this licence.

1  
2  
3 1 **Internet-based cognitive-behavioral therapy for tinnitus: Secondary analysis**  
4  
5  
6 2 **to examine predictors of outcomes**  
7  
8  
9 3

10  
11 4 **Hansapani Rodrigo,<sup>1</sup> Eldré W. Beukes,<sup>2,3</sup> Gerhard Andersson,<sup>4,5</sup> & Vinaya Manchaiah,<sup>2,6</sup>**  
12

- 13  
14 5 1. School of Mathematical and Statistical Sciences, University of Texas Rio Grande Valley,  
15  
16 6 Texas, USA  
17  
18 7 2. Department of Speech and Hearing Sciences, Lamar University, Beaumont, Texas, USA  
19  
20 8 3. Department of Vision and Hearing Sciences, School of Psychology and Sport Science,  
21  
22 9 Anglia Ruskin University, Cambridge, United Kingdom  
23  
24  
25 10 4. Department of Behavioural Sciences and Learning, Department of Biomedical and  
26  
27 11 Clinical Sciences, Linköping University, Linköping, Sweden  
28  
29 12 5. Department of Clinical Neuroscience, Division of Psychiatry, Karolinska Institute,  
30  
31 13 Stockholm, Sweden  
32  
33  
34 14 6. Department of Speech and Hearing, School of Allied Health Sciences, Manipal,  
35  
36 15 Karnataka, India  
37  
38  
39 16  
40

41 17 **Corresponding author:** Prof. Vinaya Manchaiah  
42

43 18 **Communication address:** Department of Speech and Hearing Sciences,  
44  
45  
46 19 Lamar University, Beaumont, Texas 77710, USA  
47

48 20 **Email:** [vinaya.manchaiah@lamar.edu](mailto:vinaya.manchaiah@lamar.edu)  
49

50 21 **Tel:** +1 (409) 880 8927  
51

52 22 **Fax:** +1 (409) 880 2265  
53  
54

55 23  
56  
57  
58  
59  
60

## 24 **Abstract**

25 **Objectives:** The current study examined predictors of outcomes of internet-based cognitive  
26 behavioural therapy (ICBT) for individuals with tinnitus.

27 **Design:** Secondary analysis of intervention studies.

28 **Setting:** Internet-based guided tinnitus intervention provided in the UK.

29 **Participants:** 228 individuals who underwent ICBT.

30 **Interventions:** ICBT.

31 **Primary and secondary outcome measures:** The key predictor variables included  
32 demographic, tinnitus, hearing-related, and treatment-related variables as well as clinical factors  
33 (e.g., anxiety, depression, insomnia) which can have an impact on the treatment outcome. A 13-  
34 point reduction in Tinnitus Functional Index (TFI) scores has been defined as a successful  
35 outcome.

36 **Results:** Of the 228 subjects who were included in the study, 65% had a successful ICBT  
37 outcome. As per the univariate analysis, participants with a master's degree or above had the  
38 highest odds of having a larger reduction in tinnitus severity (OR 3.47; 95% CI 1.32-12.51),  
39 compared to the participants who had education only up to high school or less. Additionally, the  
40 baseline tinnitus severity was found to be a significant variable (OR 2.65; 95% CI 1.50-4.67)  
41 contributing to a successful outcome with the intervention. Both linear and logistic regression  
42 models have identified education level and baseline tinnitus severity to be significant predictor  
43 variables contributing to reduction in tinnitus severity post-ICBT. As per the linear regression  
44 model, participants who had received disability allowance had shown a 25.3-point lower TFI  
45 reduction compared to those who did not experience a decrease in their workload due to tinnitus  
46 after adjusting for baseline tinnitus severity and their education level.

1  
2  
3 47 **Conclusions:** Predictors of intervention outcome can be used as a means of triaging patients to  
4  
5 48 the most suited form of treatment to achieve optimal outcomes and to make healthcare savings.  
6  
7 49 Future studies should consider including a heterogeneous group of participants as well as other  
8  
9 50 predictor variables not included in the current study.  
10  
11  
12  
13  
14

## 15 52 **Key Words**

16  
17 53 Tinnitus, Internet interventions, Digital therapeutics, Predictors of outcomes, Cognitive  
18  
19 54 behavioural therapy  
20  
21  
22  
23

## 24 56 **Strengths and limitations of the study**

- 25  
26  
27 57     ▪ The current study, to our knowledge is the first study to use combined data from multiple  
28  
29 58 studies to examine the predictors of ICBT outcome for tinnitus.  
30  
31 59     ▪ The study included a homogeneous group of tinnitus patients due to the strict  
32  
33 60 inclusion/exclusion criteria and may not have included all the possible variables (e.g.,  
34  
35 61 health literacy, acceptability and motivation of users, satisfaction from the intervention,  
36  
37 62 intervention engagement) that may have played a role in ICBT outcome.  
38  
39 63     ▪ The sample size remained relatively small when compared to the number of predictive  
40  
41 64 factors included which may have hampered the study results.  
42  
43 65     ▪ The multivariable analyses may have some limitations in terms of examining complex  
44  
45 66 relationships. Other statistical models including artificial intelligence and machine  
46  
47 67 learning techniques may have more value in examining the non-linear relationship.  
48  
49  
50  
51  
52  
53  
54  
55  
56  
57  
58  
59  
60

## 70 **Introduction**

71 Tinnitus is the perception of sounds in the absence of external stimulation and is often heard as a  
72 ringing or buzzing meaningless sound(s). It is a very common condition with at least 15% of the  
73 adult population having tinnitus.<sup>1</sup> Tinnitus is highly heterogeneous, both in the way it manifests  
74 as well as in the manner those with tinnitus respond to treatment options.<sup>2</sup> The National Study of  
75 Hearing in England found that of the general population surveyed ( $N = 48, 313$ ), 10.1% reported  
76 any tinnitus, 2.8% reported moderately annoying tinnitus, 1.6% reported severely annoying  
77 tinnitus, and 0.5% were unable to lead a normal life due to the severity of the tinnitus.<sup>1</sup>

78 Although there are several management strategies described in the literature, most are not  
79 evidence based. The main exception is Cognitive Behavioural Therapy (CBT), as indicated in  
80 various systematic reviews of randomized controlled trials.<sup>3-6</sup> Clinical practice guidelines based  
81 on research evidence and expert consensus recommend CBT as a management option for  
82 individuals with tinnitus and is supported by the American Academy of Otolaryngology-Head  
83 and Neck Surgery (AAO-HNS).<sup>7</sup>

84  
85 Despite positive and strong evidence for CBT, individuals with tinnitus are rarely offered CBT in  
86 their local clinics. For example, a large-scale epidemiological study in the US showed that  
87 medication (which is not recommended for tinnitus in clinical guidelines) was discussed 50% of  
88 the time by health professionals, whereas the CBT was discussed as a management option only  
89 0.2% of the time.<sup>8</sup> This is most likely a consequence of the limited number of trained  
90 professionals who provide CBT for tinnitus. One solution to overcome this issue is to use  
91 Internet-based CBT (ICBT), in which patients are provided with CBT in a self-help format over  
92 the internet with minimal guidance from a tinnitus expert.<sup>9</sup> A series of controlled studies in

1  
2  
3 93 Sweden, Germany, the United Kingdom, and the United States have demonstrated positive  
4  
5 94 effects of ICBT in reducing tinnitus distress as well as reducing its comorbidities such as anxiety,  
6  
7  
8 95 depression, and insomnia.<sup>9</sup> In addition to the changes noted in standardized outcome measures,  
9  
10 96 the qualitative analysis of user experiences has highlighted the perceived benefits of this  
11  
12 97 program.<sup>10</sup> In addition, the improvements noted from ICBT have been maintained for 1-year  
13  
14  
15 98 post-intervention.<sup>11</sup> These results suggest that ICBT is a highly promising approach to provide  
16  
17 99 evidence-based tinnitus management.  
18

19 100  
20  
21 101 Although the previous studies on ICBT have shown favourable results, group effects were  
22  
23 102 mainly reported. There is limited understanding of who is likely to benefit (or not) from the  
24  
25  
26 103 ICBT intervention. In other words, only a few studies have examined predictors of ICBT  
27  
28 104 outcomes in tinnitus research. For example, the long-term analysis of the previous UK studies  
29  
30 105 suggested that the best predictors of tinnitus improvements at 1-year were the baseline tinnitus  
31  
32 106 severity, engagement with ICBT program (i.e., more modules read), and higher self-reported  
33  
34 107 satisfaction with the intervention.<sup>11</sup> Studies in other health areas have also examined the  
35  
36 108 predictors of outcome for a range of internet-based health interventions.<sup>12-16</sup> These studies have  
37  
38 109 inconsistently identified various demographic as well as disease-specific variables that could  
39  
40 110 predict the successful and non-successful participants on internet interventions.<sup>16</sup> There remains  
41  
42 111 a clear gap in knowledge in terms of predictors of ICBT outcomes for tinnitus.  
43  
44  
45  
46

47 112  
48  
49 113 Predictors of intervention outcomes may help triage patients to the most suitable tinnitus  
50  
51 114 intervention. If interventions are recommended based on their suitability, it can potentially  
52  
53 115 improve the outcomes resulting in healthcare savings. The objective of the current study was to  
54  
55  
56  
57  
58  
59  
60

1  
2  
3 116 examine the predictors of outcomes of ICBT intervention for individuals with tinnitus based on  
4  
5 117 the secondary analysis of the pooled results from the three-phase clinical trial undertaken in the  
6  
7  
8 118 UK.  
9

10 119

## 120 **Method**

### 121 **Study design and participants**

122 A large data set was sought to identify predictors of outcome. Trials with similar methodologies  
123 were hence sought to merge to form a larger data set. Although a few previous studies regarding  
124 ICBT were conducted in Europe, extensive outcome measures were not used. Following these  
125 trials, three trials were conducted in the UK using the same outcome measures. These trials were  
126 used due to a lack of other controlled trials available to pool data from. This present study thus  
127 formed a secondary analysis of data collected from three separate ICBT trials. Study participants  
128 from the three separate trials with different designs including the single-group pre-post-test  
129 design,<sup>17</sup> an efficacy RCT design (Clinical Trials.gov: NCT02370810),<sup>18</sup> and an effectiveness  
130 RCT design (Clinical Trials.gov: NCT02665975)<sup>19</sup> were combined. These studies were  
131 conducted during 2016-18. In the efficacy trial, the experimental group underwent ICBT  
132 immediately after allocation whereas the control group underwent the same intervention  
133 following an 8-week weekly check-in period. In the effectiveness trial, the experimental group  
134 underwent the ICBT intervention whereas the control group underwent treatment as usual,  
135 consisting of in-person tinnitus counselling and sound therapy, provided by the audiologists at  
136 three hospital settings. The data were collected from only those who underwent the ICBT  
137 intervention and were included in this study. The study team was granted access to the de-  
138 identified datasets, not containing any personally identifiable information, as part of a data



1  
2  
3 139 sharing policy. The ethical clearance for these studies was obtained from the Faculty of Science  
4  
5 140 and Technology Research Ethics Panel of Anglia Ruskin University (ARU reference:  
6  
7 141 FST/FREP/14/478 and FST/FREP/14/478) and the East of England–Cambridge South Research  
8  
9 142 Ethics Committee (REC reference: 16/EE/0148) and Health Research Authority (IRAS project  
10  
11 143 ID: 195565). The study results are presented using the TRIPOD checklist (see Supplementary  
12  
13 144 file 1).  
14  
15  
16  
17 145

18  
19 146 Combining the data from three trials resulted in the inclusion of 228 participants. Of these, 36  
20  
21 147 were from the pilot trial, 146 from the efficacy trial, and the remaining 46 were from the  
22  
23 148 effectiveness trial.  
24  
25

26 149

## 27 28 150 **Intervention**

29  
30 151 The intervention included a CBT program that was specifically developed for individuals with  
31  
32 152 tinnitus.<sup>20</sup> This intervention was originally developed by psychologists in Sweden,<sup>21</sup> but later  
33  
34 153 adapted by audiologists in the UK<sup>22</sup> and the US.<sup>23</sup> The intervention was administered using a  
35  
36 154 secured ePlatform<sup>24,25</sup> and presented in a self-help format. The intervention was presented over  
37  
38 155 an 8-weeks period, during which the users were given access to 2-3 modules each week. The  
39  
40 156 CBT program was divided into 21 modules, of which 5 were optional. The modules included  
41  
42 157 content such as applied relaxation, thought analysis, cognitive restructuring, imagery, and  
43  
44 158 exposure techniques. Each module included text, images, and videos to enhance the user  
45  
46 159 experience. In addition, users were required to complete various exercises to engage them in the  
47  
48 160 intervention. Although the intervention was presented in a self-help format, the users had access  
49  
50 161 to minimal guidance from an audiologist (EB). Generally, this included examining weekly  
51  
52  
53  
54  
55  
56  
57  
58  
59  
60

1  
2  
3 162 exercises users completed and providing feedback as well as answering any questions they may  
4  
5 163 have in the secured messaging system. An average of 10 minutes per participant was spent on  
6  
7 164 providing guidance and support, although some users required more support.  
8  
9

10 165

### 11 166 **Outcome measures**

12  
13  
14 167 The study participants completed an extensive pre-intervention questionnaire that collected data  
15  
16 168 on demographics, tinnitus-related and treatment-related history. In addition, participants also  
17  
18 169 completed various standardized patient-reported outcome measures (PROMs) at baseline (T0), at  
19  
20 170 post-intervention (T1) and at the 2-month follow-up (T2). The *primary outcome measure*  
21  
22 171 included the Tinnitus Functional Index (TFI)<sup>26</sup> to assess tinnitus severity/distress. This is a 25-  
23  
24 172 item questionnaire with scores ranging between 0 to 100. Scores below 25 indicate mild tinnitus  
25  
26 173 with no need for intervention, scores ranging between 25 to 50 indicate a significant problem  
27  
28 174 with possible need for intervention, and scores above 50 indicate severe enough tinnitus possibly  
29  
30 175 requiring a more intensive intervention. The TFI has good psychometric properties with  
31  
32 176 acceptable internal consistency (0.97) and test-retest reliability (0.8).<sup>26</sup>  
33  
34  
35  
36  
37

38 177

39  
40 178 The *secondary outcome measures* included the Insomnia Severity Index (ISI)<sup>27</sup> as a measure of  
41  
42 179 insomnia, the Generalized Anxiety Disorder (GAD-7)<sup>28</sup> as a measure of anxiety, the Patient  
43  
44 180 Health Questionnaire (PHQ-9)<sup>29</sup> as a measure of depression, the Hearing Handicap Inventory for  
45  
46 181 Adults Screening version (HHIA-S)<sup>30</sup> as a measure of self-reported hearing disability, the  
47  
48 182 Hyperacusis Questionnaire (HQ)<sup>31</sup> to assess the presence hyperacusis (i.e., reduced tolerance of  
49  
50 183 everyday sounds), the Cognitive Failures Questionnaire (CFQ)<sup>32</sup> was administered to assess  
51  
52  
53  
54  
55  
56  
57  
58  
59

184 cognitive functions, and the Satisfaction with Life Scales (SWLS)<sup>33</sup> to assess the global life  
185 satisfaction.

186

### 187 **Patient and public involvement**

188 As a secondary analysis, no patients were involved in these studies. The data originates for  
189 individuals with tinnitus who had previously received CBT delivered via the internet (i.e.,  
190 ICBT). As the same protocol was followed for all study participants and all received the same  
191 intervention, merging this data was possible.

192

### 193 **Variables included in the predictive model**

194 **Outcome Variable:** The dependent variable was the pre-and post-intervention change in tinnitus  
195 distress based on the TFI score (TFI change). The 13-point change in TFI scores identified as a  
196 clinically meaningful (or significant) change by the original authors<sup>26</sup> was used to define a  
197 clinically significant intervention outcome.

198

### 199 **Predictor Variables:**

200 Predictor variables were selected based on clinical reasoning and findings from previous studies  
201 by Beukes et al.<sup>11</sup> (see Supplementary file 2 for details). Thirty-two variables were selected as  
202 potential predictor (independent) variables and included demographic, tinnitus and hearing-  
203 related variables, tinnitus treatment related variables. Clinical factors are as follows:

204

- 1  
2  
3 205     ▪ Demographic variables (n=7): age (dichotomous), gender (dichotomous), education level  
4  
5 206           (ordinal), employment type (categorical), loud noise exposure (dichotomous), diagnosed  
6  
7 207           with a psychological condition (dichotomous), work less due to tinnitus (categorical).  
8  
9  
10 208     ▪ Tinnitus and hearing-related variables (n=15): baseline tinnitus severity (dichotomous),  
11  
12 209           tinnitus duration (dichotomous), how often tinnitus heard (ordinal), tinnitus location  
13  
14 210           (categorical), tinnitus types (9 different types, dichotomous), multiple tones heard  
15  
16 211           (dichotomous), and hearing loss (categorical).  
17  
18  
19 212     ▪ Treatment-related to tinnitus (n=4): past treatment sought (dichotomous), sounds can  
20  
21 213           distract from tinnitus (ordinal), hearing aid use (categorical), and medication use  
22  
23 214           (dichotomous).  
24  
25  
26 215     ▪ Clinical factors (n=7): anxiety (dichotomous), depression (dichotomous), insomnia  
27  
28 216           (dichotomous), hyperacusis (dichotomous), hearing disability (dichotomous), cognitive  
29  
30 217           functions (dichotomous), and life satisfaction (dichotomous).  
31  
32  
33 218

### 35 219 **Data analysis**

36  
37 220 The data were analysed using descriptive statistics as well as univariate and multivariable linear  
38  
39 221 regression and logistic regression models. Linear models were used to identify the factors  
40  
41 222 affecting a significant TFI score change while the logistic model was used to evaluate the factors  
42  
43 223 which specifically effects outcomes and was thus selected. There were 98 subjects who had all  
44  
45 224 their predictive variables except their post TFI scores. With the intention of preserving the power  
46  
47 225 of the analysis, we have retained those subjects in the analysis after applying the predictive mean  
48  
49 226 matching (PMM) data imputation.<sup>34</sup> Data imputation with PMM has been identified to be less  
50  
51  
52  
53  
54  
55  
56  
57  
58  
59  
60

1  
2  
3 227 vulnerable to model misspecification as there is no need to define an explicit model for the  
4  
5 228 distribution of the missing values.<sup>35</sup>  
6  
7

8 229

9  
10 230 The univariate analysis was performed using Chi-square or Fisher's exact test to examine the  
11  
12 231 effect of single variables on the ICBT outcome using all the variables. The multivariable  
13  
14 232 regression model was used to identify the effect of the variables on tinnitus reduction post ICBT  
15  
16 233 while adjusting for the baseline tinnitus severity as a variable previously identified to relate to  
17  
18 234 the success of ICBT.<sup>11</sup> Prior to the multivariable analyses, the full data set was divided into  
19  
20 235 training (80%,  $n = 183$ ) and testing (20%,  $n = 45$ ) to make a fair comparison among all the  
21  
22 236 predictive models. The training data set was used to develop the corresponding multivariable  
23  
24 237 regression models while the testing data set was used to evaluate the model predictions. Several  
25  
26 238 competing multivariable models (both linear and logistic) were examined. The best models were  
27  
28 239 selected based on the lowest mean squared error and the lowest Akaike Information Criterion  
29  
30 240 (AIC).<sup>36</sup> During multivariable analysis, we began with the full model, including all the predictor  
31  
32 241 variables, and used backward elimination based on AIC to select the final model. R squared and  
33  
34 242 Adj. R squared values have been reported, as they are statistical measures of fit that indicate how  
35  
36 243 much variation of the outcome is explained by the predictor variable(s) in a linear regression  
37  
38 244 model.<sup>37</sup> We also reported the mean squared error as it is a better measure of prediction accuracy.  
39  
40 245 Both crude and model-based odds ratios were calculated and used to evaluate the effect of the  
41  
42 246 variable. The Hosmer-Lemeshow goodness-of-fit statistic was calculated to assess the calibration  
43  
44 247 of the final model.<sup>38</sup>  
45  
46  
47  
48  
49  
50

51 248  
52  
53  
54  
55  
56  
57  
58  
59  
60

1  
2  
3 249 The dependent variable TFI change was used as a continuous variable for a linear regression  
4  
5 250 analysis whereas the dichotomous variable (i.e., 13-point change yes or no) was used for logistic  
6  
7  
8 251 regression analysis. All statistical analyses were performed with R statistical software (Version:  
9  
10 252 3.6.3). All tests were two-sided and threshold at 5% level of significance.  
11  
12  
13 253

## 14 254 **Results**

### 15 255 **Participant demographics**

16  
17 256 The mean age of study participants was 55.14 (SD: 12.92) years, and 57% of the subjects  
18  
19 257 ( $n=130$ ) were males. The mean tinnitus duration was 17.68 (SD: 19.42) years. Further details on  
20  
21  
22 258 demographic, tinnitus, hearing-related and treatment-related variables are provided in Table 1 of  
23  
24  
25 259 the Supplementary file 3. Table 1 presents details on clinical variables. The mean baseline  
26  
27 260 tinnitus severity and tinnitus severity following the ICBT intervention were 57.93 (SD: 19.17)  
28  
29 261 and 34.22 (SD: 22.76) respectively. Figure 1 presents the pre-and post-intervention tinnitus  
30  
31  
32 262 severity (TFI) score variation, indicating statistically significant differences between these scores  
33  
34  
35 263 ( $p < 0.001$ ) with the paired t-test. There were 148 participants (65%) with a 13-point or higher  
36  
37 264 reduction after the intervention.  
38  
39  
40  
41 265

42 266 <Table 1 here>

43 267 <Figure 1 here>

44  
45 268

### 46 269 **Univariate analysis to examine the predictors of ICBT outcome**

47  
48  
49 270 With the exception of education level ( $p = .01$ ), none of the demographic variables were  
50  
51  
52 271 associated with post-intervention tinnitus severity change of 13-point or more. Participants with a  
53  
54  
55  
56  
57  
58  
59  
60

1  
2  
3 272 master's degree or above had the highest odds of having a larger severity change score, with an  
4  
5 273 odds ratio of 3.47 (95% CIs: 1.32, 12.51), compared to the participants who had education only  
6  
7  
8 274 up to high school or less. In terms of tinnitus and hearing-related variables, the baseline tinnitus  
9  
10 275 severity ( $p = 0.001$ ) was significantly associated with treatment success. Participants who had a  
11  
12 276 higher baseline tinnitus severity (i.e., TFI scores of greater than or equal to 55.2) had significantly  
13  
14 277 higher odds of treatment success (OR: 2.65; 95% CIs: 1.50, 4.67) compared to those who had a  
15  
16 278 baseline severity less than 55.2. The details of the univariate analyses are provided in Tables 2-5  
17  
18  
19 279 of the Supplementary file 3.  
20  
21

22 280

23  
24 281 In terms of the treatment-related variables, sounds can distract ( $p = .001$ ) showed a significant  
25  
26 282 association with treatment success. Those who reported being distracted by the sound partially  
27  
28 283 (OR: 4.34; 95% CIs: 1.82, 10.34) or not at all (OR: 3.15; 95% CIs: 0.99, 10.00) were at higher  
29  
30 284 odds of having a successful treatment outcome when compared to those who were fully  
31  
32 285 distracted. However, the odds among the participants who used hearing aids either in one ear or  
33  
34 286 both ears compared to those who did not were not statistically significantly different with a  $p$ -  
35  
36 287 value 0.26 (see Table 4 of the Supplementary file 3). Tinnitus described as voice-like had a 91%  
37  
38 288 lower odds of success with the treatment. None of the clinical factors were significantly  
39  
40 289 associated with the outcome.  
41  
42  
43

44 290

#### 47 291 **Multivariable analyses to examine predictors of ICBT outcome**

48  
49 292 Working less due to tinnitus ( $p = .046$ ), baseline tinnitus severity ( $p < .001$ ), and education level  
50  
51 293 ( $p = .014$ ), showed significant associations with outcome (i.e., TFI reduction). Modified models  
52  
53 294 with the remaining variables were not statistically significant. Moreover, several two-way  
54  
55  
56  
57  
58  
59

1  
2  
3 295 interactions were tested. We did not find any gender interactions with regard to the maskability of  
4  
5 296 sounds ( $p = .87$ ) and) and hearing aid usage ( $p = .68$ ) variables. The overall model resulted with  
6  
7 297 an R squared = 0.35 and Adj. R squared of 0.20. The final model resulted in a root mean square of  
8  
9 298 22.81 on the testing data set. All required regression assumptions were satisfied with the selected  
10  
11 299 model. The final regression model (see Table 2) was selected with backward elimination based on  
12  
13 300 AIC.  
14

15  
16  
17 301 This model indicated that those who received disability allowance due to having severe tinnitus  
18  
19 302 and being unable to work had shown a reduction of 25.30-points (95% CIs: -46.35, -4.24) in TFI  
20  
21 303 compared to those who did not have to work less due to tinnitus. Moreover, for every 10 unit  
22  
23 304 increase in the baseline tinnitus severity, there was a 8.3-point (95% CIs: 0.65, 1.00) reduction in  
24  
25 305 their TFI score after adjusting for other variables. Participants who had master's degree or above  
26  
27 306 compared to participants who had a college education showed an expected reduction of 17-points  
28  
29 307 (95% CIs: 5.78, 27.84) in their TFI score.  
30  
31  
32

33 308

34  
35 309 <Table 2 here>  
36

37 310

38  
39  
40 311 Multivariable logistic regressions were performed next and indicated that baseline tinnitus  
41  
42 312 severity ( $p < 0.001$ ) and education level ( $p = .001$ ) were identified as significant predictors (see  
43  
44 313 Table 3). This model had an AIC of 212.21. Modified models to the prior model indicated that  
45  
46 314 other variables were not statistically significant (see Table 4).  
47  
48

49 315

50  
51 316 The multivariable model adjusted OR (see Table 3) for the participants who had master's level or  
52  
53 317 above education compared to those who had high school education or less also showed 9.65  
54  
55  
56  
57  
58  
59



1  
2  
3 318 higher odds (95% CIs: 2.32, 40.15) of having a successful outcome. Similar to the linear  
4  
5 319 regression model, baseline tinnitus severity had also shown a significant association (OR: 1.04;  
6  
7 320 95% CIs: 1.02, 1.06) with the treatment outcome. The Hosmer-Lemeshow goodness-of-fit test  
8  
9 321 confirmed a better fit in the current model with a  $p$ -value of 0.50 ( $\chi^2=7.36$ ,  $df=8$ ).  
10  
11  
12 322

13  
14 323 <Table 3 here>

15  
16 324 <Table 4 here>

17  
18 325

19  
20  
21 326 Fewer variables were statistically significant in the logistic regression model, which identified  
22  
23 327 influencing predictors of the ICBT success. This was due to the fact that the logistic regression  
24  
25 328 model evaluated predictors of treatment successes (i.e., 13-point change), while the multivariable  
26  
27 329 regression model identified the predictors of a significant TFI reduction.  
28  
29  
30

31 330

## 32 331 **Discussion**

33  
34 332 Accessible and affordable tinnitus interventions are needed to alleviate tinnitus distress as well as  
35  
36 333 comorbid problems with anxiety, depression, and insomnia. The current study examined  
37  
38 334 predictors of outcomes for ICBT. In this exploratory study, only a limited number of variables  
39  
40 335 were identified as possibly reducing tinnitus severity scores on the TFI by at least 13 points  
41  
42 336 following ICBT intervention, and the results vary depending on the model used. Only  
43  
44 337 educational level and baseline tinnitus severity were predictors in both linear and logistic models.  
45  
46 338 The other significant variable in the linear regression models included the demographic variable,  
47  
48 339 work restrictions due to tinnitus when controlling for baseline tinnitus severity and education  
49  
50  
51  
52 340 level. These key findings are discussed below.  
53  
54  
55  
56  
57  
58  
59  
60

1  
2  
3 341  
4  
5 342 In terms of demographic variables, education level was found to be a significant predictor of  
6  
7 343 ICBT success as those with a master's education or higher had higher odds of having a successful  
8  
9 344 outcome compared with those with high school education in both the linear and logistic models.  
10  
11 345 This was expected as having good literacy skills is essential when understanding the intervention  
12  
13 346 materials. The intervention materials used in these studies were written at an average of 9<sup>th</sup> grade  
14  
15 347 readinglevel<sup>23</sup> suggesting that they were not easily accessible for participants with only a high  
16  
17 348 school education. These results highlight the importance of health literacy considerations when  
18  
19 349 developing text-based self-help interventions such as ICBT. Additionally, those who reported  
20  
21 350 work restrictions due to tinnitus were at a lower odds of having a successful outcome. This  
22  
23 351 finding needs further exploration in future studies. Working may, for instance, provide some  
24  
25 352 distraction from tinnitus as supported by reports during the 2020 COVID-19 pandemic that  
26  
27 353 tinnitus was more bothersome for some individuals due to the lack of distractions from  
28  
29 354 commuting and sounds at work.<sup>39</sup> Closely monitoring the effects of tinnitus is important to ensure  
30  
31 355 that tinnitus can be managed so that individuals are still able to work effectively.  
32  
33 356  
34  
35 357 When examining the tinnitus and hearing-related variables, baseline tinnitus severity was found to  
36  
37 358 be a significant predictor of ICBT success, as seen in previous studies.<sup>11</sup> Tinnitus perceptions vary  
38  
39 359 greatly, and in this study, those with tinnitus presenting as musical, lower-pitched or clicking  
40  
41 360 were less likely to have a positive outcome of ICBT. This finding certainly needs further  
42  
43 361 exploration as the limited number of participants in each group of tinnitus perception. One of the  
44  
45 362 CBT intervention aims is to help participants to reinterpret their tinnitus to a less threatening  
46  
47 363 sound. It may be that these sounds are not easily likened to everyday sounds than other types of  
48  
49  
50  
51  
52  
53  
54  
55  
56  
57  
58  
59

1  
2  
3 364 tinnitus (i.e., buzzing, high pitch, pulsing, humming) making it difficult to develop adaptation  
4  
5 365 strategies.

6  
7  
8 366  
9  
10 367 Of the four treatment-related variables, only those who reported to use of wearing one hearing aid  
11  
12 368 were found to be at better odds of ICBT success. This finding needs further exploration to identify  
13  
14 369 other characteristics that may be associated with an outcome such as having tinnitus in only one  
15  
16 370 ear. Although the evidence for the use of hearing aids alone for tinnitus management is  
17  
18 371 limited,<sup>40,41</sup> hearing aids may for some reduce the tinnitus percept and aid communication  
19  
20 372 difficulties.<sup>42</sup> Ensuring hearing loss is addressed in addition to the provision of ICBT may lead to  
21  
22 373 more optimal outcomes for those with co-existing hearing loss.  
23  
24  
25

26 374  
27  
28 375 Regarding studying the clinical factors, those with higher levels of depression were found to have  
29  
30 376 higher reduction in the TFI score. However, the participants with insomnia showed lower odds of  
31  
32 377 success. Interestingly, other clinical factors including anxiety, hyperacusis, hearing disability as  
33  
34 378 well as cognitive functioning were not significant predictors of ICBT in the current study. Further  
35  
36 379 studies and models are required to verify these results.  
37  
38  
39

40 380  
41  
42 381 Studies in other health areas have also examined the predictors of a range of internet-based health  
43  
44 382 interventions.<sup>12-15</sup> Generally, higher baseline symptoms predict increased treatment response, as  
45  
46 383 in anxiety and depression,<sup>43</sup> and higher obsessive-compulsive behaviours when treating the  
47  
48 384 obsessive-compulsive disorder.<sup>44</sup> Variables such as age and gender have been mentioned as  
49  
50 385 significant predictors for some ICBT interventions.<sup>15,43</sup> Most previous ICBT interventions have  
51  
52 386 not identified pre-treatment characteristics to predict or moderate outcomes.<sup>16</sup> Most ICBT studies  
53  
54  
55  
56  
57  
58  
59

1  
2  
3 387 have indicated that ICBT works irrespective of treatment history.<sup>43</sup> Contrarily, previous treatment  
4  
5 388 has shown worse outcomes in some previous studies.<sup>45</sup> However, it may be that some participants  
6  
7 389 may have sought alternative therapies which have no evidence for tinnitus. For this reason, it  
8  
9  
10 390 would be useful to examine specific types of previous treatments in future studies to distinguish  
11  
12 391 between those who had evidence-based interventions before enrolling to ICBT than those who did  
13  
14 392 not.  
15

### 19 394 **Study limitations and future research**

21 395 The current study was to our knowledge the first study to combine data from multiple studies to  
22  
23 396 examine the predictors of ICBT outcome for tinnitus. However, it has limitations. First, the study  
24  
25 397 may have included a homogeneous group of tinnitus patients due to study inclusion/exclusion  
26  
27 398 criteria and may not have included all the possible variables (e.g., health literacy, acceptability  
28  
29 399 and motivation of users, satisfaction from the intervention, intervention engagement) that may  
30  
31 400 have played a role in ICBT outcome. These factors were not investigated for this study. As they  
32  
33 401 have been found to contribute to outcomes,<sup>46</sup> they should be included in future studies. Second,  
34  
35 402 the sample size remained relatively small when compared to the number of predictive factors  
36  
37 403 included. Third, multivariable analyses may have some limitations in terms of examining complex  
38  
39 404 relationships. Moreover, due to the high multicollinearity between the predictor variables, there  
40  
41 405 were several competing models which had led to the same prediction accuracies and root mean  
42  
43 406 square errors. Additionally, these linear models lack in identifying any predictor variables that  
44  
45 407 have a non-linear relationship with the response variables. For these reasons, the study results  
46  
47 408 must be viewed as preliminary. Future studies may benefit from utilizing non-linear statistical  
48  
49 409 models such as Generalized Additive Models (GAMs), and also artificial intelligence and  
50  
51  
52  
53  
54  
55  
56  
57  
58  
59  
60

1  
2  
3 410 machine learning models like neural networks, random forest and support vector machines, as  
4  
5 411 some variables like tinnitus duration and depression had shown lower correlation with the  
6  
7 412 response (with correlations: -0.10 and 0.29, respectively). In addition, including more relevant  
8  
9 413 predictive factors (e.g., health literacy, motivation, engagement, adherence) in future studies may  
10  
11 414 help improve predictive accuracy. Currently, we have used AIC value to compare the competing  
12  
13 415 models. For future studies, we are planning to use average AUC and Brier scores to compare  
14  
15 416 models.  
16  
17  
18  
19  
20  
21

## 22 **Funding**

23  
24 419 This work was partially funded by the National Institute on Deafness and Communication  
25  
26 420 Disorders (NIDCD) of the National Institute of Health (NIH) under the award number  
27  
28 421 R21DC017214.  
29  
30

## 31 422 32 33 **Twitter**

34 423  
35  
36 424 @VManchaiah, @Eldre7, @profGergardA  
37  
38  
39 425  
40

## 41 426 **Contributors**

42  
43 427 HR, VM, EB and GA conceptualized the study. EB administered the intervention and collected  
44  
45 428 the data. HR performed the data analysis. VM and HR prepared the first draft of the manuscript.  
46  
47 429 All authors read and approved the final manuscript.  
48  
49

50 430

## 51 431 **Competing interests**

52  
53  
54  
55 432 None to declare.  
56  
57  
58  
59  
60

1  
2  
3 433  
4

5 434 **Patient consent for publication**

6  
7  
8 435 Not required.  
9

10 436  
11

12  
13 437 **Data availability statement**

14  
15 438 De-identified data are available upon reasonable request.  
16  
17

18 439

19  
20 440 **References**

- 21  
22  
23 441 1. Davis, A., & Refaie, A. E. (2020). The epidemiology of tinnitus. In R. Tyler (Ed.), *The*  
24  
25 442 *Handbook of Tinnitus* (pp. 1–23). Singular.  
26  
27 443 2. Cederroth, C. R., Gallus, S., Hall, D. A., Kleinjung, T., Langguth, B., Maruotti, A.,  
28  
29 444 Meyer, M., Norena, A., Probst, T., Pryss, R., Searchfield, G., Shekhawat, G.,  
30  
31 445 Spiliopoulou, M., Vanneste, S., & Schlee, W. (2019). Editorial: Towards an  
32  
33 446 Understanding of Tinnitus Heterogeneity. *Frontiers in Aging neuroscience*, *11*, 53.  
34  
35 447 <https://doi.org/10.3389/fnagi.2019.00053>  
36  
37 448 3. Hesser, H., Weise, C., Westin, V. Z., & Andersson, G. (2011). A systematic review and  
38  
39 449 meta-analysis of randomized controlled trials of cognitive-behavioral therapy for tinnitus  
40  
41 450 distress. *Clinical Psychology Review*, *31*(4), 545-553.  
42  
43 451 4. Hoare, D. J., Kowalkowski, V. L., Kang, S., & Hall, D. A. (2011). Systematic review and  
44  
45 452 meta-analyses of randomized controlled trials examining tinnitus management. *The*  
46  
47 453 *Laryngoscope*, *121*(7), 1555-1564. doi: 10.1002/lary.21825.  
48  
49 454 5. Landry, E. C., Sandoval, X. C. R., Simeone, C. N., Tidball, G., Lea, J., & Westerberg, B.  
50  
51 455 D. (2020). Systematic review and network meta-analysis of cognitive and/or behavioral  
52  
53  
54  
55  
56  
57  
58  
59  
60

- 1  
2  
3 456 therapies (CBT) for tinnitus. *Otology & Neurotology*, 41(2), 153-166. [https://doi:](https://doi.org/10.1097/MAO.0000000000002472)  
4  
5 457 10.1097/MAO.0000000000002472  
6  
7  
8 458 6. Fuller, T., Cima, R., Langguth, B., Mazurek, B., Vlaeyen, J.W.S., & Hoare, D.J. (2020).  
9  
10 459 Cognitive behavioural therapy for tinnitus. *Cochrane Database of Systematic Reviews*, 1,  
11  
12 460 CD012614. DOI: 10.1002/14651858.CD012614.pub2  
13  
14  
15 461 7. Tunkel, D. E., Bauer, C. A., Sun, G. H., Rosenfeld, R. M., Chandrasekhar, S. S.,  
16  
17 462 Cunningham, E. R., Jr, Archer, S. M., Blakley, B. W., Carter, J. M., Granieri, E. C.,  
18  
19 463 Henry, J. A., Hollingsworth, D., Khan, F. A., Mitchell, S., Monfared, A., Newman, C.  
20  
21 464 W., Omole, F. S., Phillips, C. D., Robinson, S. K., Taw, M. B., ... Whamond, E. J.  
22  
23 465 (2014). Clinical practice guideline: tinnitus. *Otolaryngology--head and neck surgery :  
24  
25 466 official journal of American Academy of Otolaryngology-Head and Neck Surgery*, 151(2  
26  
27 467 Suppl), S1–S40. <https://doi.org/10.1177/0194599814545325>  
28  
29  
30  
31 468 8. Bhatt, J.M., Lin, H.W., & Bhattacharyya, N. (2016). Prevalence, severity, exposures, and  
32  
33 469 treatment patterns of tinnitus in the United States. *JAMA Otolaryngology–Head & Neck  
34  
35 470 Surgery*, 142 (10), 959-965. DOI: 10.1001/jamaoto.2016.1700  
36  
37  
38 471 9. Beukes, E. W., Manchaiah, V., Allen, P. M., Baguley, D. M., & Andersson, G. (2019).  
39  
40 472 Internet-based interventions for adults with hearing loss, tinnitus, and vestibular  
41  
42 473 disorders: A systematic review and meta-analysis. *Trends in Hearing*, 23,  
43  
44 474 2331216519851749. <https://doi.org/10.1177/2331216519851749>  
45  
46  
47 475 10. Beukes, E. W., Manchaiah, V., Davies, A. S., Allen, P. M., Baguley, D. M., &  
48  
49 476 Andersson, G. (2018c). Participants' experiences of an Internet-based cognitive  
50  
51 477 behavioral therapy intervention for tinnitus. *International Journal of Audiology*, 57(12),  
52  
53 478 947–954.  
54  
55  
56  
57  
58  
59  
60

- 1  
2  
3 479 11. Beukes, E.W., Manchaiah, V., Baguley, D.M., Allen, P.M. & Andersson, G. (2018d).  
4  
5 480 Long-term efficacy of Audiologist-guided Internet-based Cognitive Behavior Therapy for  
6  
7 481 Tinnitus. *American Journal of Audiology*, 27(3S), 431-447. doi:10.1044/2018\_AJA-  
9  
10 482 IMIA3-18-0004
- 12 483 12. Blankers, M., Koeter, M.W. & Schippers, G.M. (2013). Baseline predictors of treatment  
13  
14 484 outcome in Internet-based alcohol interventions: a recursive partitioning analysis  
15  
16 485 alongside a randomized trial. *BMC Public Health* 13, 455. [https://doi.org/10.1186/1471-](https://doi.org/10.1186/1471-2458-13-455)  
18  
19 486 2458-13-455
- 21 487 13. Chen, H., Rodriguez, M. A., Qian, M., Kishimoto, T., Lin, M., & Berger, T. (2020).  
22  
23 488 Predictors of treatment outcomes and adherence in internet-based cognitive behavioral  
24  
25 489 therapy for social anxiety in China. *Behavioural and cognitive psychotherapy*, 48(3),  
26  
27 490 291–303. <https://doi.org/10.1017/S1352465819000730>
- 31 491 14. Jonas B., Tensil M.-D., Leuschner F., Strüber E., & Tossmann P. (2019) Predictors of  
32  
33 492 treatment response in a web-based intervention for cannabis users. *Internet*  
34  
35 493 *Interv.* 2019;18:100261. doi: 10.1016/j.invent.2019.100261.
- 38 494 15. Spek, V., Nyklíček, I., Cuijpers, P., & Pop, V. (2008). Predictors of outcome of group  
39  
40 495 and internet-based cognitive behavior therapy. *Journal of affective disorders*, 105(1-3),  
41  
42 496 137–145. <https://doi.org/10.1016/j.jad.2007.05.001>
- 44 497 16. Andersson, G., Titov, N., Dear, B. F., Rozental, A., & Carlbring, P. (2019). Internet-  
45  
46 498 delivered psychological treatments: from innovation to implementation. *World*  
47  
48 499 *Psychiatry*, 18(1), 20-28. doi:10.1002/wps.20610



- 1  
2  
3 500 17. Beukes, E. W., Allen, P. M., Manchaiah, V., Baguley, D. M., & Andersson, G. (2017).  
4  
5 501 Internet-based intervention for tinnitus: Outcome of a single-group open trial. *American*  
6  
7 502 *Academy of Audiology*, 12(4), 340-351. doi:10.3766/jaaa.16055  
8  
9  
10 503 18. Beukes, E. W., Baguley, D. M., Allen, P. M., Manchaiah, V., & Andersson, G. (2018a).  
11  
12 504 Audiologist-guided Internet-based cognitive behavior therapy for adults with tinnitus in  
13  
14 505 the United Kingdom: A randomized controlled trial. *Ear and Hearing*, 39(3), 423–433.  
15  
16 506 <https://doi.org/10.1097/AUD.0000000000000505>  
17  
18  
19 507 19. Beukes, E. W., Andersson, G., Allen, P. M., Manchaiah, V., & Baguley, D. M. (2018b).  
20  
21 508 Effectiveness of guided Internet-based Cognitive Behavioral Therapy vs face-to-face  
22  
23 509 clinical care for treatment of tinnitus: A randomized clinical trial. *JAMA*  
24  
25 510 *Otolaryngology—Head & Neck Surgery*, 144(12), 1126–1133.  
26  
27 511 <https://doi.org/10.1001/jamaoto.2018.2238>  
28  
29  
30 512 20. Beukes, E., Andersson, G., Manchaiah, V., & Kaldo, V. (2021). *Cognitive behavioral*  
31  
32 513 *therapy for tinnitus*. San Diego, USA: Plural Publishing Inc.  
33  
34  
35 514 21. Andersson, G., Strömberg, T., Ström, T. & Lyttkens, L. (2002). Randomised controlled  
36  
37 515 trial of Internet based cognitive behavior therapy for distress associated with tinnitus.  
38  
39 516 *Psychosomatic Medicine*, 64, 810-816.  
40  
41  
42 517 22. Beukes, E. W., Vlaescu, G., Manchaiah, V., Baguley, D. M., Allen, P. M., Kaldo, V., &  
43  
44 518 Andersson, G. (2016). Development and technical functionality of an Internet-based  
45  
46 519 intervention for tinnitus in the UK. *Internet Interventions*, 6, 6–15.  
47  
48 520 <https://doi.org/10.1016/j.invent.2016.08.002>  
49  
50  
51 521 23. Beukes, E. W., Fagelson, M., Aronson, E. P., Munoz, M. F., Andersson, G., &  
52  
53 522 Manchaiah, V. (2020). Readability following cultural and linguistic adaptations of an  
54  
55  
56  
57  
58  
59  
60

- 1  
2  
3 523 Internet-based intervention for tinnitus for use in the United States. *American Journal of*  
4  
5 524 *Audiology*, 29(2), 97–109. [https://doi.org/10.1044/2019\\_AJA-19-00014](https://doi.org/10.1044/2019_AJA-19-00014)  
6  
7  
8 525 24. Vlaescu, G., Alasjö, A., Miloff, A., Carlbring, P., & Andersson, G. (2016). Features and  
9  
10 526 functionality of the Iterapi platform for Internet-based psychological treatment. *Internet*  
11  
12 527 *Interventions*, 6, 107–114. <https://doi.org/10.1016/j.invent.2016.09.006>  
13  
14  
15 528 25. Manchaiah, V., Vlaescu, G., Varadaraj, S., Aronson, E. P., Fagelson, M. A., Munoz, M.  
16  
17 529 F., Andersson, G., & Beukes, E. W. (2020). Features, Functionality, and Acceptability of  
18  
19 530 Internet-Based Cognitive Behavioral Therapy for Tinnitus in the United States. *American*  
20  
21 531 *Journal of Audiology*, 29(3), 476–490. [https://doi.org/10.1044/2020\\_AJA-20-00002](https://doi.org/10.1044/2020_AJA-20-00002)  
22  
23  
24 532 26. Meikle, M. B., Henry, J. A., Griest, S. E., et al. (2012). The tinnitus functional index:  
25  
26 533 development of a new clinical measure for chronic, intrusive tinnitus. *Ear Hear*, 33, 153–  
27  
28 534 176.  
29  
30  
31 535 27. Bastien, C. H., Vallieres, A., & Morin, C. M. (2001). Validation of the Insomnia Severity  
32  
33 536 Index as an outcome measure for insomnia research. *Sleep Med*, 2, 297–307.  
34  
35  
36 537 28. Spitzer, R. L., Kroenke, K., Williams, J. B., et al. (2006). A brief measure for assessing  
37  
38 538 generalized anxiety disorder: the GAD-7. *Arch Intern Med*, 166, 1092–1097.  
39  
40 539 29. Spitzer, R. L., Kroenke, K., & Williams, J. B. (1999). Validation and utility of a self-  
41  
42 540 report version of PRIME-MD: the PHQ primary care study. *Primary Care Evaluation of*  
43  
44 541 *Mental Disorders. Patient Health Questionnaire. JAMA*, 282, 1737–1744.  
45  
46  
47 542 30. Newman, C. W., Weinstein, B. E., Jacobson, G. P., et al. (1991). Test-retest reliability of  
48  
49 543 the hearing handicap inventory for adults. *Ear Hear*, 12, 355–357.  
50  
51 544 31. Khalfa, S., Dubal, S., Veillet, E., et al. (2002). Psychometric normalization of a  
52  
53 545 hyperacusis questionnaire. *ORL J Otorhinolaryngol Relat Spec*, 64, 436–442.  
54  
55  
56  
57  
58  
59

- 1  
2  
3 546 32. Broadbent, D. E., Cooper, P. F., FitzGerald, P., et al. (1982). The Cognitive Failures  
4  
5 547 Questionnaire (CFQ) and its correlates. *Br J Clin Psychol*, 21 (Pt 1), 1–16.  
6  
7  
8 548 33. Diener, E., Emmons, R. A., Larsen, R. J., et al. (1985). The Satisfaction With Life Scale.  
9  
10 549 *J Pers Assess*, 49, 71–75.  
11  
12 550 34. Lodder, P. (2013). To impute or not impute: That’s the question. Advising on research  
13  
14 551 methods: Selected topics. Huizen: Johannes van Kessel Publishing.  
15  
16  
17 552 35. Little, R. J. A., & Rubin, D. B. (2002). *Statistical Analysis with Missing Data*. New  
18  
19 553 York: John Wiley & Sons.  
20  
21 554 36. Akaike, H. (1974). A new look at the statistical model identification. *IEEE Transactions*  
22  
23 555 *on Automatic Control*, 19 (6): 716–723  
24  
25  
26 556 37. Montgomery, D. C., Peck, E. A. & Vinning, G. G. (2012), *Introduction to Linear*  
27  
28 557 *Regression Analysis*, Wiley Series in Probability and Statistics  
29  
30  
31 558 38. Agresti, A. (2013) *Categorical Data Analysis*. 3rd Edition, John Wiley & Sons Inc.,  
32  
33 559 Hoboken.  
34  
35 560 39. Beukes, E. W., Baguley, D. M., Jacquemin, L., Lourenco, M., Allen, P. M., Onozuka, J.,  
36  
37 561 Stockdale, D., Kaldo, V., Andersson, G., & Manchaiah, V. (2020). Changes in Tinnitus  
38  
39 562 Experiences During the COVID-19 Pandemic. *Frontiers in public health*, 8, 592878.  
40  
41 563 <https://doi.org/10.3389/fpubh.2020.592878>  
42  
43  
44 564 40. Hoare, D. J., Edmondson-Jones, M., Sereda, M., Akeroyd, M. A., & Hall, D. (2014).  
45  
46 565 Amplification with hearing aids for patients with tinnitus and co-existing hearing  
47  
48 566 loss. *The Cochrane database of systematic reviews*, (1), CD010151.  
49  
50 567 <https://doi.org/10.1002/14651858.CD010151.pub2>  
51  
52  
53  
54  
55  
56  
57  
58  
59  
60

- 1  
2  
3 568 41. Shekhawat, G. S., Searchfield, G. D., & Stinear, C. M. (2013). Role of hearing AIDS in  
4  
5 569 tinnitus intervention: a scoping review. *Journal of the American Academy of*  
6  
7 570 *Audiology*, 24(8), 747–762. <https://doi.org/10.3766/jaaa.24.8.11>  
9  
10 571 42. Del Bo, L., & Ambrosetti, U. (2007). Hearing aids for the treatment of tinnitus. *Progress*  
11  
12 572 *in brain research*, 166, 341–345. [https://doi.org/10.1016/S0079-6123\(07\)66032-4](https://doi.org/10.1016/S0079-6123(07)66032-4)  
13  
14 573 43. Stjerneklar, S., Hougaard, E., & Thastum, M. (2019). Guided internet-based cognitive  
15  
16 574 behavioral therapy for adolescent anxiety: predictors of treatment response. *Internet*  
17  
18 575 *interventions*, 15, 116-125. <https://doi.org/10.1016/j.invent.2019.01.003>  
19  
20 576 44. Andersson, E., Ljótsson, B., Hedman, E., Enander, J., Kaldo, V., Andersson, G.,  
21  
22 577 Lindefors, N. and Rück, C. (2015). Predictors and moderators of Internet-based cognitive  
23  
24 578 behavior therapy for obsessive–compulsive disorder: Results from a randomized  
25  
26 579 trial. *Journal of Obsessive-Compulsive and Related Disorders*, 4: 1-7.  
27  
28 580 <https://doi.org/10.1016/j.jocrd.2014.10.003>  
29  
30 581 45. Andersson, G. (1997). Prior treatments in a group of tinnitus sufferers seeking treatment.  
31  
32 582 *Psychotherapy and Psychosomatics*, 66, 107-110.  
33  
34 583 46. Fuhr, K., Schröder, J., Berger, T., Moritz, S., Meyer, B., Lutz, W., Hohagen, F.,  
35  
36 584 Hautzinger, M., & Klein JP. (2018). The association between adherence and outcome in  
37  
38 585 an Internet intervention for depression. *Journal of Affective Disorders*, 229, 443-449. doi:  
39  
40 586 10.1016/j.jad.2017.12.028.  
41  
42  
43  
44  
45  
46  
47  
48  
49  
50  
51  
52  
53  
54  
55  
56  
57  
58  
59  
60

590 **Tables**591 **Table 1: Details of clinical variables of the study participants**

| Characteristic                                                              | Mean (SD)     |
|-----------------------------------------------------------------------------|---------------|
| Pre-intervention tinnitus severity (measured using TFI, scores range 0-11)  | 57.93 (19.17) |
| Post-intervention tinnitus severity (measured using TFI, scores range 0-11) | 34.22 (22.76) |
| 2-month follow up tinnitus severity (measured using TFI, scores range 0-11) | 34.23 (24.19) |
| Anxiety (measured using GAD-7, scores range 0-21)                           | 7.29 (5.52)   |
| Depression (measured using PHQ-9, scores range 0-27)                        | 7.61 (5.73)   |
| Insomnia (measured using ISI, scores range 0-28)                            | 12.49 (6.67)  |
| Hyperacusis (measured using HQ, scores range 0-40)                          | 18.33 (9.05)  |
| Hearing disability (measured using the HHIA-S, scores range 0-40)           | 16.18 (11.64) |
| Cognitive failures (measured using the CFQ, scores range 0-100)             | 38.54 (15.63) |
| Life satisfaction (measured using SWLS, scores range 0-40)                  | 20.71 (7.55)  |

592

593

595 **Table 2: The best multiple linear regression model summary**

596

| Predictor Variable                        | Estimate | 95% CI         | P-value           |
|-------------------------------------------|----------|----------------|-------------------|
| Intercept                                 | -28.94   | -41.70, -16.18 | <0.0000           |
| Work less: No                             | Ref      |                |                   |
| Work less: Reduced hours                  | -6.25    | -23.90, 11.39  | 0.48              |
| Work less: Stopped work                   | -0.58    | -10.52, 9.36   | 0.91              |
| Work less: Disability allowance           | -25.30   | -46.35, -4.24  | <b>0.02</b>       |
| Baseline tinnitus severity                | 0.83     | 0.65, 1.00     | <b>&lt;0.0001</b> |
| Education Level: High school or less      | Ref      |                |                   |
| Education Level: College                  | -2.25    | -12.61, 8.11   | 0.67              |
| Education Level: Vocational training      | 0.98     | -10.29, 12.25  | 0.86              |
| Education Level: Bachelor's degree        | 5.14     | -4.13, 14.42   | 0.28              |
| Education Level: Master's degree or above | 16.81    | 5.78, 27.84    | <b>0.003</b>      |

597

599 **Table 3: The multivariable logistic regression model summary and the model adjusted**  
 600 **odds ratio (95% confidence interval) for successful ICBT outcome of 13 points of higher.**

601

|                                           | Estimate | P-value           | Model based adjusted<br>OR (95% CI for OR) |
|-------------------------------------------|----------|-------------------|--------------------------------------------|
| Intercept                                 | -2.32    | 0.0005            | 0.10 (0.03, 0.37)                          |
| Baseline tinnitus severity                | 0.04     | <b>&lt; 0.001</b> | <b>1.04 (1.02, 1.06)</b>                   |
| Education level: High school or less      | Ref      |                   |                                            |
| Education level: College                  | -0.4     | 0.41              | 0.67 (0.26, 1.74)                          |
| Education level: Vocational training      | 0.41     | 0.47              | 1.49 (0.50, 4.48)                          |
| Education level: Bachelor's degree        | 0.68     | 0.14              | 1.98 (0.79, 4.98)                          |
| Education level: Master's degree or above | 2.27     | <b>0.001</b>      | <b>9.65 (2.32, 40.15)</b>                  |

602

604 **Table 4: Predictor variables which were insignificant in multivariable regression models**

605

|    |                           | <b>P-value</b>                                   |                                                    |
|----|---------------------------|--------------------------------------------------|----------------------------------------------------|
|    | <b>Predictor Variable</b> | <b>Multivariable Linear<br/>Regression Model</b> | <b>Multivariable Logistic<br/>Regression Model</b> |
| 1  | Gender                    | 0.47                                             | 0.83                                               |
| 2  | Hearing Loss              | 0.89                                             | 0.72                                               |
| 3  | Tinnitus type: Ringing    | 0.38                                             | 0.91                                               |
| 4  | Tinnitus type: Buzzing    | 0.43                                             | 0.53                                               |
| 5  | Tinnitus type: High pitch | 0.56                                             | 0.48                                               |
| 6  | Tinnitus type: Low pitch  | 0.33                                             | 0.46                                               |
| 7  | Tinnitus type: Pulsing    | 0.99                                             | 0.34                                               |
| 8  | Tinnitus type: Clicking   | 0.09                                             | 0.01                                               |
| 9  | Tinnitus type: Music      | 0.37                                             | 0.69                                               |
| 10 | Tinnitus type: Voices     | 0.34                                             | 0.09                                               |
| 11 | Tinnitus type: Humming    | 0.96                                             | 0.06                                               |
| 12 | Anxiety                   | 0.07                                             | 0.48                                               |
| 13 | Depression                | 0.76                                             | 0.86                                               |
| 14 | Insomnia                  | 0.94                                             | 0.53                                               |
| 15 | Hyperacusis               | 0.75                                             | 0.53                                               |
| 16 | Hearing disability        | 0.84                                             | 0.57                                               |
| 17 | Cognitive functions       | 0.71                                             | 0.72                                               |
| 18 | Life satisfaction         | 0.75                                             | 0.84                                               |



|    |                                       |               |      |
|----|---------------------------------------|---------------|------|
| 19 | Multiple tones heard                  | 0.26          | 0.81 |
| 20 | Loud noise exposure                   | 0.32          | 0.76 |
| 21 | Work less due to tinnitus             | Refer Table 2 | 0.46 |
| 22 | Presence of a psychological condition | 0.88          | 0.72 |
| 23 | Past treatment sought                 | 0.60          | 0.83 |
| 24 | Hearing aid use                       | 0.21          | 0.20 |
| 25 | Sounds can distract                   | 0.51          | 0.11 |
| 26 | Medication use                        | 0.73          | 0.87 |
| 27 | Tinnitus location                     | 0.50          | 0.27 |
| 28 | Employment type                       | 0.63          | 0.90 |
| 29 | Age                                   | 0.88          | 0.70 |
| 30 | Tinnitus Duration                     | 0.17          | 0.93 |
| 31 | How often tinnitus is heard           | 0.23          | 0.57 |

606

## 607 Figure Legends

608 **Figure 1: Tinnitus severity (TFI scores) pre- and post-intervention.** Boxplot represents the  
 609 five-number summary (minimum, first quartile, median, third quartile, and maximum). The thick  
 610 dark line represents the median.

611

1  
2  
3  
4  
5  
6  
7  
8  
9  
10  
11  
12  
13  
14  
15  
16  
17  
18  
19  
20  
21  
22  
23  
24  
25  
26  
27  
28  
29  
30  
31  
32  
33  
34  
35  
36  
37  
38  
39  
40  
41  
42  
43  
44  
45  
46  
47  
48  
49  
50  
51  
52  
53  
54  
55  
56  
57  
58  
59  
60



Figure 1

338x190mm (225 x 225 DPI)

## Supplementary File 1

Table 1: TRIPOD Checklist – Prediction model development

| Section/Topic                | Item | Checklist Item                                                                                                                                                                                        | Page  |
|------------------------------|------|-------------------------------------------------------------------------------------------------------------------------------------------------------------------------------------------------------|-------|
| <b>Title and abstract</b>    |      |                                                                                                                                                                                                       |       |
| Title                        | 1    | Identify the study as developing and/or validating a multivariable prediction model, the target population, and the outcome to be predicted.                                                          | 1     |
| Abstract                     | 2    | Provide a summary of objectives, study design, setting, participants, sample size, predictors, outcome, statistical analysis, results, and conclusions.                                               | 2     |
| <b>Introduction</b>          |      |                                                                                                                                                                                                       |       |
| Background and objectives    | 3a   | Explain the medical context (including whether diagnostic or prognostic) and rationale for developing or validating the multivariable prediction model, including references to existing models.      | 3-5   |
|                              | 3b   | Specify the objectives, including whether the study describes the development or validation of the model or both.                                                                                     | 5     |
| <b>Methods</b>               |      |                                                                                                                                                                                                       |       |
| Source of data               | 4a   | Describe the study design or source of data (e.g., randomized trial, cohort, or registry data), separately for the development and validation data sets, if applicable.                               | 6     |
|                              | 4b   | Specify the key study dates, including start of accrual; end of accrual; and, if applicable, end of follow-up.                                                                                        | 6     |
| Participants                 | 5a   | Specify key elements of the study setting (e.g., primary care, secondary care, general population) including number and location of centres.                                                          | 6     |
|                              | 5b   | Describe eligibility criteria for participants.                                                                                                                                                       | 6     |
|                              | 5c   | Give details of treatments received, if relevant.                                                                                                                                                     | 6-7   |
| Outcome                      | 6a   | Clearly define the outcome that is predicted by the prediction model, including how and when assessed.                                                                                                | 8-9   |
|                              | 6b   | Report any actions to blind assessment of the outcome to be predicted.                                                                                                                                | NA    |
| Predictors                   | 7a   | Clearly define all predictors used in developing or validating the multivariable prediction model, including how and when they were measured.                                                         | 8-9   |
|                              | 7b   | Report any actions to blind assessment of predictors for the outcome and other predictors.                                                                                                            | NA    |
| Sample size                  | 8    | Explain how the study size was arrived at.                                                                                                                                                            | 9     |
| Missing data                 | 9    | Describe how missing data were handled (e.g., complete-case analysis, single imputation, multiple imputation) with details of any imputation method.                                                  | 10    |
| Statistical analysis methods | 10a  | Describe how predictors were handled in the analyses.                                                                                                                                                 | 10    |
|                              | 10b  | Specify type of model, all model-building procedures (including any predictor selection), and method for internal validation.                                                                         | 10    |
|                              | 10d  | Specify all measures used to assess model performance and, if relevant, to compare multiple models.                                                                                                   | 10    |
| Risk groups                  | 11   | Provide details on how risk groups were created, if done.                                                                                                                                             | NA    |
| <b>Results</b>               |      |                                                                                                                                                                                                       |       |
| Participants                 | 13a  | Describe the flow of participants through the study, including the number of participants with and without the outcome and, if applicable, a summary of the follow-up time. A diagram may be helpful. | 11    |
|                              | 13b  | Describe the characteristics of the participants (basic demographics, clinical features, available predictors), including the number of participants with missing data for predictors and outcome.    | 11    |
| Model development            | 14a  | Specify the number of participants and outcome events in each analysis.                                                                                                                               | 11    |
|                              | 14b  | If done, report the unadjusted association between each candidate predictor and outcome.                                                                                                              | 11-12 |
| Model specification          | 15a  | Present the full prediction model to allow predictions for individuals (i.e., all regression coefficients, and model intercept or baseline survival at a given time point).                           | 12-15 |
|                              | 15b  | Explain how to use the prediction model.                                                                                                                                                              | 14-15 |
| Model performance            | 16   | Report performance measures (with CIs) for the prediction model.                                                                                                                                      | 14-15 |
| <b>Discussion</b>            |      |                                                                                                                                                                                                       |       |
| Limitations                  | 18   | Discuss any limitations of the study (such as nonrepresentative sample, few events per predictor, missing data).                                                                                      | 18-19 |
| Interpretation               | 19b  | Give an overall interpretation of the results, considering objectives, limitations, and results from similar studies, and other relevant evidence.                                                    | 15-18 |
| Implications                 | 20   | Discuss the potential clinical use of the model and implications for future research.                                                                                                                 | 19    |
| <b>Other information</b>     |      |                                                                                                                                                                                                       |       |
| Supplementary information    | 21   | Provide information about the availability of supplementary resources, such as study protocol, Web calculator, and data sets.                                                                         | 9, 11 |
| Funding                      | 22   | Give the source of funding and the role of the funders for the present study.                                                                                                                         | 19    |

## Supplementary File 2: Predictor Variables

Table 1: Demographic variables

| Variable                               | Question                                                                                              | Response options                                                                                                                                                                                     |
|----------------------------------------|-------------------------------------------------------------------------------------------------------|------------------------------------------------------------------------------------------------------------------------------------------------------------------------------------------------------|
| Age                                    | What is your age?                                                                                     | In years<br><br>Split into dichotomous variables ( $\leq 57$ years of age and $> 57$ years of age) based on the median                                                                               |
| Gender                                 | What is your gender?                                                                                  | Male (1), Female (2)                                                                                                                                                                                 |
| Education level                        | What is the highest level of education you have completed?                                            | Highschool or less (1), College (2), Vocational training (3), Bachelor's degree (4), Master's degree or above (5)                                                                                    |
| Employment type                        | What best describes your employment?                                                                  | Manager (1), Professional (2), Technical (3), Administrative (4), Skilled tradesman (5), Service occupation (6), Medical (7), Sales (8), Home maker (9), Student (10), Retired (11), Unemployed (12) |
| Loud noise exposure                    | Have you been exposed to loud noise?                                                                  | Yes (1) , No (0)                                                                                                                                                                                     |
| Diagnosed with psychological condition | Have you been presently diagnosed with any psychological conditions including anxiety and depression? | Yes (1) , No (0)                                                                                                                                                                                     |
| Work less due to tinnitus              | Do you work less because of your tinnitus?                                                            | No (0), Reduced hours (1), Stopped work (2), Disability allowance (3)                                                                                                                                |

Table 2: Tinnitus and hearing-related variables

| Variable                     | Question                                           | Response options                                                                                                     |
|------------------------------|----------------------------------------------------|----------------------------------------------------------------------------------------------------------------------|
| Baseline tinnitus severity   | Measured using the Tinnitus Functional Index (TFI) | Scores range from 0 to 100.<br><br>Split into dichotomous variables ( $\leq 55.2$ and $> 55.2$ ) based on the median |
| Tinnitus duration            | How long have you had tinnitus for?                | In years<br><br>Split into dichotomous variables ( $\leq 10.00$ years and $> 10.00$ years) based on the median       |
| How often is tinnitus heard? | How often is tinnitus heard?                       | Occasionally (1), When taking out my hearing aid(s) (2), At night (3), Most of the time (4), All the time (5)        |
| Tinnitus location            | Where do you notice your tinnitus?                 | One ear (1), Both ears (2), In my head (3), Unsure (4), Other (5)                                                    |

|                                      |                                                                                                                                                                                                                                        |                                                |
|--------------------------------------|----------------------------------------------------------------------------------------------------------------------------------------------------------------------------------------------------------------------------------------|------------------------------------------------|
| Type of tinnitus (9 different types) | <ul style="list-style-type: none"> <li>▪ Ringing</li> <li>▪ Buzzing</li> <li>▪ High pitched sound</li> <li>▪ Low pitched sound</li> <li>▪ Pulsing</li> <li>▪ Clicking</li> <li>▪ Music</li> <li>▪ Voices</li> <li>▪ Humming</li> </ul> | For each item: Yes (1) , No (0)                |
| Multiple tones heard                 | This variable is computed based on responses to types of tinnitus. Answer yes to multiple types of tinnitus was considered as multiple tones heard                                                                                     | Yes (1) , No (0)                               |
| Presence of a hearing loss           | Do you have a hearing loss?                                                                                                                                                                                                            | No (0), Both ears (1), One ear (2), Unsure (3) |

Table 3: Treatment-related variables

| Variable                          | Question                                                                                             | Response options                         |
|-----------------------------------|------------------------------------------------------------------------------------------------------|------------------------------------------|
| Past treatment sought             | Have you received treatment for tinnitus in the past?                                                | Yes (1) , No (0)                         |
| Sounds can distract from tinnitus | How well can sounds around you distract you from your tinnitus or make the tinnitus less noticeable? | Fully (1), Partially (2), Not at all (3) |
| Hearing aid use                   | Do you wear hearing aid(s) or any other amplification devices?                                       | No (0), One ear (1), Both ears (2)       |
| Medication use                    | Do you currently take any medications?                                                               | Yes (1) , No (0)                         |

Table 4: Clinical factors

| Variable   | Questionnaire                        | Number of items/<br>Response options                                                       | Score                                                                                                                                                                                                                                                                                                                                                                  |
|------------|--------------------------------------|--------------------------------------------------------------------------------------------|------------------------------------------------------------------------------------------------------------------------------------------------------------------------------------------------------------------------------------------------------------------------------------------------------------------------------------------------------------------------|
| Anxiety    | General Anxiety Disorders (GAD-7)    | 7-items<br>4-point scale with “not at all” (score of 0) to “nearly every day” (score of 3) | Higher number indicates more severe anxiety (scores range between 0–21). The total score is interpreted as follows: <ul style="list-style-type: none"> <li>▪ 0–4: minimal anxiety</li> <li>▪ 5–9: mild anxiety</li> <li>▪ 10–14: moderate anxiety</li> <li>▪ 15–21: severe anxiety</li> </ul> Split into dichotomous variables ( $\leq 9$ no anxiety and $>9$ anxiety) |
| Depression | Patient Health Questionnaire (PHQ-9) | 9-items<br>4-point scale with “not at all” (score of                                       | Higher number indicates more severe depression (scores range between 0–27).                                                                                                                                                                                                                                                                                            |

|                    |                                                            |                                                                                                         |                                                                                                                                                                                                                                                                                                                                                                                                                                                                                        |
|--------------------|------------------------------------------------------------|---------------------------------------------------------------------------------------------------------|----------------------------------------------------------------------------------------------------------------------------------------------------------------------------------------------------------------------------------------------------------------------------------------------------------------------------------------------------------------------------------------------------------------------------------------------------------------------------------------|
|                    |                                                            | 0) to “nearly every day” (score of 3)                                                                   | <p>The total score is interpreted as follows:</p> <ul style="list-style-type: none"> <li>▪ 5–9: mild depression</li> <li>▪ 10–14: moderate</li> <li>▪ 15–19: moderately severe</li> <li>▪ 20–18: severe depression</li> </ul> <p>Split into dichotomous variables (<math>\leq 14</math> no depression and <math>&gt; 14</math> depression)</p>                                                                                                                                         |
| Insomnia           | Insomnia Severity Index (ISA)                              | <p>7-item</p> <p>5-point scale with “no problem” (score of 0) to “very severe problem” (score of 4)</p> | <p>Higher number indicates more severe insomnia (scores range between 0–28).</p> <p>The total score is interpreted as follows:</p> <ul style="list-style-type: none"> <li>▪ 0–7: not clinically significant</li> <li>▪ 8–14: subthreshold insomnia</li> <li>▪ 15–21: clinical insomnia (moderate severity)</li> <li>▪ 22–28: clinical insomnia (severe degree)</li> </ul> <p>Split into dichotomous variables (<math>\leq 14</math> no insomnia and <math>&gt; 15</math> insomnia)</p> |
| Hyperacusis        | Hyperacusis Questionnaire (HQ)                             | <p>14-items</p> <p>4-point scale with “no” (score of 0) to “yes, a lot” (score of 3)</p>                | <p>Higher number more severe hyperacusis (scores range between 0–42).</p> <p>The total score is interpreted as follows:</p> <ul style="list-style-type: none"> <li>▪ <math>&gt; 28</math>: strong hypersensitivity</li> </ul> <p>Split into dichotomous variables (<math>\leq 28</math> no hyperacusis and <math>&gt; 28</math> hyperacusis)</p>                                                                                                                                       |
| Hearing disability | Hearing Handicap Inventory for Adults – Screening (HHIA-S) | <p>10-items</p> <p>3-point scale with “yes” (score of 4) to “no” day (0)</p>                            | <p>Higher number more severe hearing disability (scores range between 0–40).</p> <p>The total score is interpreted as follows:</p> <ul style="list-style-type: none"> <li>▪ 0–8: no hearing disability</li> <li>▪ 10–24: mild to moderate hearing disability</li> <li>▪ 26–40: severe hearing disability</li> </ul> <p>Split into dichotomous variables (<math>\leq 8</math> no hearing disability and <math>\geq 10</math> hearing disability)</p>                                    |

|                    |                                        |                                                                                            |                                                                                                                                                                                                                                                                                                                                                                                                                                                                                                  |
|--------------------|----------------------------------------|--------------------------------------------------------------------------------------------|--------------------------------------------------------------------------------------------------------------------------------------------------------------------------------------------------------------------------------------------------------------------------------------------------------------------------------------------------------------------------------------------------------------------------------------------------------------------------------------------------|
| Cognitive failures | Cognitive Failures Questionnaire (CFQ) | 25-items<br><br>5-point scale with “never” (score of 0) to “very often” (score of 4)       | Higher scores indicate more difficulties (cognitive failures) in perception, memory, and motor function (score range 0–100).<br><br>The total score is interpreted as follows:<br>The scores range 0–100 with higher scores indicating more cognitive failures/problems (or reduced cognitive functioning).<br><br>Split into dichotomous variables (<=32 no cognitive problems and >32 cognitive problems)                                                                                      |
| Life satisfaction  | Satisfaction with Life Scale (SWLS)    | 5-items<br><br>7-point scale with “strongly disagree” (score of 1) to “strongly agree” (7) | Higher number indicated more satisfaction with life (scores range between 5–35).<br><br>The total score is interpreted as follows: <ul style="list-style-type: none"> <li>▪ 0–9: extremely dissatisfied</li> <li>▪ 10–14: dissatisfied</li> <li>▪ 15–19: below average satisfaction</li> <li>▪ 20–24: average satisfaction</li> <li>▪ 25–29: high satisfaction</li> <li>▪ 30–35: highly satisfied</li> </ul> Split into dichotomous variables (<=19 life satisfaction and >19 high satisfaction) |

### Supplementary File 3: Univariate analysis to examine association between predictor variables and outcome variable

Table 1: Participant demographic characteristics (n=228)

| Characteristic                                                        | N (%)     | Mean (SD)     |
|-----------------------------------------------------------------------|-----------|---------------|
| <b>Demographic characteristics</b>                                    |           |               |
| Age (in years)                                                        |           | 55.14 (12.92) |
| Gender                                                                |           |               |
| ▪ Female                                                              | 98 (43%)  |               |
| ▪ Male                                                                | 130 (57%) |               |
| Highest level of education                                            |           |               |
| ▪ High school or below                                                | 59 (26%)  |               |
| ▪ College                                                             | 47 (21%)  |               |
| ▪ Vocational training                                                 | 31 (14%)  |               |
| ▪ Bachelor's degree                                                   | 61 (27%)  |               |
| ▪ Masters degree or above                                             | 30 (13%)  |               |
| Employment                                                            |           |               |
| ▪ Manager                                                             | 27 (12%)  |               |
| ▪ Professional                                                        | 46 (20%)  |               |
| ▪ Technical                                                           | 13 (6%)   |               |
| ▪ Administrative                                                      | 17 (7%)   |               |
| ▪ Skilled tradesman                                                   | 11 (5%)   |               |
| ▪ Service occupation                                                  | 11 (5%)   |               |
| ▪ Medical                                                             | 6 (3%)    |               |
| ▪ Sales                                                               | 8 (3%)    |               |
| ▪ Homemaker                                                           | 4 (2%)    |               |
| ▪ Student                                                             | 1 (0%)    |               |
| ▪ Retired                                                             | 73 (32%)  |               |
| ▪ Unemployed                                                          | 11 (5%)   |               |
| Loud noise exposure                                                   |           |               |
| ▪ Yes                                                                 | 103 (45%) |               |
| ▪ No                                                                  | 125 (55%) |               |
| Diagnosed with a psychological condition                              |           |               |
| ▪ Yes                                                                 | 50 (22%)  |               |
| ▪ No                                                                  | 178 (78%) |               |
| Working less due to tinnitus                                          |           |               |
| ▪ Reduced hours                                                       | 8 (4%)    |               |
| ▪ Stopped work                                                        | 32 (14%)  |               |
| ▪ Disability allowance                                                | 7 (3%)    |               |
| ▪ No                                                                  | 181 (79%) |               |
| <b>Tinnitus and hearing-related characteristics</b>                   |           |               |
| Baseline tinnitus severity (measured using Tinnitus Functional Index) |           | 57.93 (19.17) |
| Tinnitus duration (in years)                                          |           | 17.68 (19.42) |
| How often tinnitus is heard                                           |           |               |



|                                                                                                                                                                                                                                                                                 |                                                                                                    |  |
|---------------------------------------------------------------------------------------------------------------------------------------------------------------------------------------------------------------------------------------------------------------------------------|----------------------------------------------------------------------------------------------------|--|
| <ul style="list-style-type: none"> <li>▪ Occasionally</li> <li>▪ When taking out my hearing aid(s)</li> <li>▪ At night</li> <li>▪ Most of the time</li> <li>▪ All the time</li> </ul>                                                                                           | 4 (2%)<br>3 (1%)<br>4 (2%)<br>63 (27%)<br>154 (68%)                                                |  |
| Tinnitus location <ul style="list-style-type: none"> <li>▪ One ear</li> <li>▪ Both ears</li> <li>▪ In my head</li> <li>▪ Other location</li> <li>▪ Unsure</li> </ul>                                                                                                            | 61 (27%)<br>109 (48%)<br>34 (15%)<br>3 (1%)<br>21 (9%)                                             |  |
| Type of tinnitus sound (answering Yes) <ul style="list-style-type: none"> <li>▪ Ringing</li> <li>▪ Buzzing</li> <li>▪ High pitched sound</li> <li>▪ Low pitched sound</li> <li>▪ Pulsating</li> <li>▪ Clicking</li> <li>▪ Music</li> <li>▪ Voices</li> <li>▪ Humming</li> </ul> | 71 (31%)<br>75 (33%)<br>130 (57%)<br>16 (7%)<br>28 (12%)<br>14 (6%)<br>4 (2%)<br>3 (1%)<br>21 (9%) |  |
| Multiple sounds heard <ul style="list-style-type: none"> <li>▪ Yes</li> <li>▪ No</li> </ul>                                                                                                                                                                                     | 73 (32%)<br>155 (68%)                                                                              |  |
| Presence of a hearing loss <ul style="list-style-type: none"> <li>▪ No</li> <li>▪ Both ears</li> <li>▪ One ear</li> <li>▪ Unsure</li> </ul>                                                                                                                                     | 49 (21%)<br>104 (46%)<br>46 (20%)<br>29 (13%)                                                      |  |
| <b>Treatment-related characteristics</b>                                                                                                                                                                                                                                        |                                                                                                    |  |
| Past tinnitus treatment sought <ul style="list-style-type: none"> <li>▪ Yes</li> <li>▪ No</li> </ul>                                                                                                                                                                            | 58 (25%)<br>170 (75%)                                                                              |  |
| Sounds can distract from tinnitus <ul style="list-style-type: none"> <li>▪ Fully</li> <li>▪ Partially</li> <li>▪ Not at all</li> </ul>                                                                                                                                          | 26 (11%)<br>178 (78%)<br>24 (10%)                                                                  |  |
| Hearing aid use <ul style="list-style-type: none"> <li>▪ No</li> <li>▪ Unilateral</li> <li>▪ Bilateral</li> </ul>                                                                                                                                                               | 159 (70%)<br>19 (8%)<br>50 (22%)                                                                   |  |
| Medication use <ul style="list-style-type: none"> <li>▪ Yes</li> <li>▪ No</li> </ul>                                                                                                                                                                                            | 130 (57%)<br>98 (43%)                                                                              |  |

Table 2: Univariate analysis with the Chi-square/ Fishers exact test results on the association between the demographic predictor categories and outcome variable (success as defined by a TFI-score changes  $\geq 13$  points or a failure). \*Indicates use of Fisher's exact test results due to less than 5 cases in subcategories.

| Predictor variable                    | Sub-Categories                  | Crude Odds Ratio (95% CIs) | P-Value      |
|---------------------------------------|---------------------------------|----------------------------|--------------|
| Age                                   | >57 years                       | 0.85 (0.50, 1.47)          | 0.57         |
|                                       | $\leq 57$ years                 | Ref                        |              |
| Gender                                | Female                          | 1.12 (0.64, 1.94)          | 0.70         |
|                                       | Male                            | Ref                        |              |
| Education level                       | College                         | 0.61 (0.31, 1.42)          | <b>0.01*</b> |
|                                       | Vocational training             | 1.70 (0.75, 4.88)          |              |
|                                       | Bachelor's degree               | 1.30 (0.67, 2.92)          |              |
|                                       | <b>Master's degree or above</b> | <b>3.47 (1.32, 12.51)</b>  |              |
|                                       | High school or less             | Ref                        |              |
| Employment type                       | Professional                    | 0.59 (0.25, 1.82)          | 0.95*        |
|                                       | Technical                       | 0.40 (0.13, 1.89)          |              |
|                                       | Administrative                  | 0.40 (0.14, 1.66)          |              |
|                                       | Skilled tradesman               | 0.56 (0.18, 3.00)          |              |
|                                       | Service occupation              | 0.80 (0.24, 4.66)          |              |
|                                       | Medical                         | 1.00 (0.22, 11.54)         |              |
|                                       | Sales                           | 0.80 (0.21, 6.00)          |              |
|                                       | Home maker                      | 0.27 (0.06, 3.00)          |              |
|                                       | Student                         | 0.40 (0.05, 35.47)         |              |
|                                       | Retired                         | 0.74 (0.32, 2.12)          |              |
|                                       | Unemployed                      | 0.80 (0.24, 4.66)          |              |
|                                       | Manager                         | Ref                        |              |
| Loud noise exposure                   | Yes                             | 0.80 (0.46, 1.38)          | 0.43         |
|                                       | No                              | Ref                        |              |
| Presence of a psychological condition | Yes                             | 1.72 (0.85, 3.46)          | 0.13         |
|                                       | No                              | Ref                        |              |
| Work less due to tinnitus             | Reduced hours                   | 1.05 (0.31, 6.18)          | 0.89*        |
|                                       | Stopped work                    | 0.81 (0.41, 1.89)          |              |
|                                       | Disability allowance            | 0.53 (0.16, 2.88)          |              |
|                                       | No                              | Ref                        |              |

Table 3: Univariate analysis with the Chi-square/ Fishers exact test results on the association between the tinnitus and hearing-related predictor categories and outcome variable (success as defined by a TFI-score changes  $\geq 13$  points or a failure). \*Indicates use of Fisher's exact test results due to less than 5 cases in subcategories.

| Predictor variable          | Sub-Categories                    | Crude Odds Ratio (95% CIs) | P-Value      |
|-----------------------------|-----------------------------------|----------------------------|--------------|
| Baseline tinnitus severity  | >55.2                             | <b>2.65 (1.50, 4.67)</b>   | <b>0.001</b> |
|                             | $\leq 55.2$                       | Ref                        |              |
| Tinnitus duration           | >10.00 years                      | 1.16 (0.66, 2.02)          | 0.60         |
|                             | $\leq 10.00$ years                | Ref                        |              |
| How often tinnitus is heard | When taking out my hearing aid(s) | 0.67 (0.02, 18.06)         | 0.19*        |
|                             | At night                          | 0.33 (0.02, 6.65)          |              |
|                             | Most of the time                  | 0.39 (0.04, 3.96)          |              |
|                             | All the time                      | 0.76 (0.08, 7.49)          |              |
|                             | Occasionally                      | Ref                        |              |
| Tinnitus location           | Both ears                         | 1.41(0.48, 4.16)           | 0.90*        |
|                             | In my head                        | 0.94 (0.48, 1.80)          |              |
|                             | Unsure                            | 1.35 (0.55, 3.34)          |              |
|                             | Other                             | 1.13 (0.10,13.16)          |              |
|                             | One ear                           | Ref                        |              |
| Tinnitus type: Ringing      | Yes                               | 1.30 (0.72, 2.37)          | 0.38         |
|                             | No                                | Ref                        |              |
| Tinnitus type: Buzzing      | Yes                               | 1.34 (0.74, 2.42)          | 0.32         |
|                             | No                                | Ref                        |              |
| Tinnitus type: High pitch   | Yes                               | 0.76 (0.44, 1.33)          | 0.34         |
|                             | No                                | Ref                        |              |
| Tinnitus type: Low pitch    | Yes                               | 0.89 (0.31, 2.56)          | 0.83         |
|                             | No                                | Ref                        |              |
| Tinnitus type: Pulsing      | Yes                               | 0.97 (0.42, 2.21)          | 0.94         |
|                             | No                                | Ref                        |              |
| Tinnitus type: Clicking     | Yes                               | 0.52 (0.17, 1.53)          | 0.23         |
|                             | No                                | Ref                        |              |
| Tinnitus type: Music        | Yes                               | 1.63 (0.17, 15.98)         | 1.00*        |
|                             | No                                | Ref                        |              |
| Tinnitus type: Voices       | Yes                               | 0.09 (0.00, 1.75)          | 0.04*        |
|                             | No                                | Ref                        |              |
| Tinnitus type: Humming      | Yes                               | 0.56 (0.23, 1.39)          | 0.21         |
|                             | No                                | Ref                        |              |
| Multiple tones heard        | Yes                               | 1.15 (0.64, 2.08)          | 0.63         |
|                             | No                                | Ref                        |              |
| Presence of a hearing loss  | Both ears                         | 1.20 (0.59, 2.41)          | 0.92         |
|                             | One ear                           | 1.19 (0.51, 2.74)          |              |
|                             | Unsure                            | 1.41 (0.53, 3.73)          |              |
|                             | No                                | Ref                        |              |

Table 4: Univariate analysis with the Chi-square/ Fishers exact test results on the association between the treatment-related predictor categories and outcome variable (success as defined by a TFI-score changes  $\geq 13$  points or a failure). \*Indicates use of Fisher's exact test results due to less than 5 cases in subcategories.

| Predictor variable    | Sub-Categories | Crude Odds Ratio (95% CIs) | P-Value      |
|-----------------------|----------------|----------------------------|--------------|
| Past treatment sought | Yes            | 0.94 (0.50, 1.74)          | 0.83         |
|                       | No             | Ref                        |              |
| Sounds can distract   | Partially      | <b>4.34 (1.82, 10.34)</b>  | <b>0.001</b> |
|                       | Not at all     | <b>3.15 (0.99, 10.00)</b>  |              |
|                       | Fully          | Ref                        |              |
| Hearing aid use       | One ear        | <b>1.57 (0.61, 5.49)</b>   | <b>0.26</b>  |
|                       | Both ear       | 0.69 (0.38, 1.39)          |              |
|                       | No             | Ref                        |              |
| Medication use        | Yes            | 1.22 (0.71, 2.12)          | 0.46         |
|                       | No             | Ref                        |              |

Table 5: Univariate analysis with the Chi-square/ Fishers exact test results on the association between the clinical factors predictor categories and outcome variable (success as defined by a TFI-score changes  $\geq 13$  points or a failure). \*Indicates use of Fisher's exact test results due to less than 5 cases in subcategories.

| Predictor variable  | Sub-Categories | Odds Ratio (95% CIs) | P-Value |
|---------------------|----------------|----------------------|---------|
| Anxiety             | Yes            | 1.53 (0.83, 2.82)    | 0.17    |
|                     | No             | Ref                  |         |
| Depression          | Yes            | 1.54 (0.62, 3.83)    | 0.35    |
|                     | No             | Ref                  |         |
| Insomnia            | Yes            | 1.27 (0.72, 2.23)    | 0.41    |
|                     | No             | Ref                  |         |
| Hyperacusis         | Yes            | 1.21 (0.56, 2.63)    | 0.62    |
|                     | No             | Ref                  |         |
| Hearing disability  | Yes            | 1.37 (0.77, 2.43)    | 0.28    |
|                     | No             | Ref                  |         |
| Cognitive functions | Yes            | 0.99 (0.56, 1.74)    | 0.97    |
|                     | No             | Ref                  |         |
| Life satisfaction   | Yes            | 0.76 (0.44, 1.33)    | 0.34    |
|                     | No             | Ref                  |         |
