# Supplementary material for: Internet-based cognitive–behavioural therapy for tinnitus: secondary analysis to examine predictors of outcomes
Source: HighWire-hosted journal article supplement (doi:10.1136/bmjopen-2021-049384), 2021-08-01
Supplement: bmjopen-2021-049384supp002_data_supplement.pdf [file bmjopen-2021-049384supp002_data_supplement.pdf]

**Supplementary File 2: Predictor Variables**

Table 1: Demographic variables

| <b>Variable</b>                        | <b>Question</b>                                                                                       | <b>Response options</b>                                                                                                                                                                              |
|----------------------------------------|-------------------------------------------------------------------------------------------------------|------------------------------------------------------------------------------------------------------------------------------------------------------------------------------------------------------|
| Age                                    | What is your age?                                                                                     | In years<br><br>Split into dichotomous variables (<=57 years of age and >57 years of age) based on the median                                                                                        |
| Gender                                 | What is your gender?                                                                                  | Male (1), Female (2)                                                                                                                                                                                 |
| Education level                        | What is the highest level of education you have completed?                                            | Highschool or less (1), College (2), Vocational training (3), Bachelor's degree (4), Master's degree or above (5)                                                                                    |
| Employment type                        | What best describes your employment?                                                                  | Manager (1), Professional (2), Technical (3), Administrative (4), Skilled tradesman (5), Service occupation (6), Medical (7), Sales (8), Home maker (9), Student (10), Retired (11), Unemployed (12) |
| Loud noise exposure                    | Have you been exposed to loud noise?                                                                  | Yes (1) , No (0)                                                                                                                                                                                     |
| Diagnosed with psychological condition | Have you been presently diagnosed with any psychological conditions including anxiety and depression? | Yes (1) , No (0)                                                                                                                                                                                     |
| Work less due to tinnitus              | Do you work less because of your tinnitus?                                                            | No (0), Reduced hours (1), Stopped work (2), Disability allowance (3)                                                                                                                                |

Table 2: Tinnitus and hearing-related variables

| <b>Variable</b>              | <b>Question</b>                                    | <b>Response options</b>                                                                                       |
|------------------------------|----------------------------------------------------|---------------------------------------------------------------------------------------------------------------|
| Baseline tinnitus severity   | Measured using the Tinnitus Functional Index (TFI) | Scores range from 0 to 100.<br><br>Split into dichotomous variables (<=55.2 and >55.2) based on the median    |
| Tinnitus duration            | How long have you had tinnitus for?                | In years<br><br>Split into dichotomous variables (<=10.00 years and >10.00 years) based on the median         |
| How often is tinnitus heard? | How often is tinnitus heard?                       | Occasionally (1), When taking out my hearing aid(s) (2), At night (3), Most of the time (4), All the time (5) |
| Tinnitus location            | Where do you notice your tinnitus?                 | One ear (1), Both ears (2), In my head (3), Unsure (4), Other (5)                                             |

|                                      |                                                                                                                                                                                                                                        |                                                |
|--------------------------------------|----------------------------------------------------------------------------------------------------------------------------------------------------------------------------------------------------------------------------------------|------------------------------------------------|
| Type of tinnitus (9 different types) | <ul style="list-style-type: none"> <li>▪ Ringing</li> <li>▪ Buzzing</li> <li>▪ High pitched sound</li> <li>▪ Low pitched sound</li> <li>▪ Pulsing</li> <li>▪ Clicking</li> <li>▪ Music</li> <li>▪ Voices</li> <li>▪ Humming</li> </ul> | For each item: Yes (1) , No (0)                |
| Multiple tones heard                 | This variable is computed based on responses to types of tinnitus. Answer yes to multiple types of tinnitus was considered as multiple tones heard                                                                                     | Yes (1) , No (0)                               |
| Presence of a hearing loss           | Do you have a hearing loss?                                                                                                                                                                                                            | No (0), Both ears (1), One ear (2), Unsure (3) |

Table 3: Treatment-related variables

| Variable                          | Question                                                                                             | Response options                         |
|-----------------------------------|------------------------------------------------------------------------------------------------------|------------------------------------------|
| Past treatment sought             | Have you received treatment for tinnitus in the past?                                                | Yes (1) , No (0)                         |
| Sounds can distract from tinnitus | How well can sounds around you distract you from your tinnitus or make the tinnitus less noticeable? | Fully (1), Partially (2), Not at all (3) |
| Hearing aid use                   | Do you wear hearing aid(s) or any other amplification devices?                                       | No (0), One ear (1), Both ears (2)       |
| Medication use                    | Do you currently take any medications?                                                               | Yes (1) , No (0)                         |

Table 4: Clinical factors

| Variable   | Questionnaire                        | Number of items/<br>Response options                                                           | Score                                                                                                                                                                                                                                                                                                                                                                  |
|------------|--------------------------------------|------------------------------------------------------------------------------------------------|------------------------------------------------------------------------------------------------------------------------------------------------------------------------------------------------------------------------------------------------------------------------------------------------------------------------------------------------------------------------|
| Anxiety    | General Anxiety Disorders (GAD-7)    | 7-items<br><br>4-point scale with “not at all” (score of 0) to “nearly every day” (score of 3) | Higher number indicates more severe anxiety (scores range between 0–21). The total score is interpreted as follows: <ul style="list-style-type: none"> <li>▪ 0–4: minimal anxiety</li> <li>▪ 5–9: mild anxiety</li> <li>▪ 10–14: moderate anxiety</li> <li>▪ 15–21: severe anxiety</li> </ul> Split into dichotomous variables ( $\leq 9$ no anxiety and $>9$ anxiety) |
| Depression | Patient Health Questionnaire (PHQ-9) | 9-items<br><br>4-point scale with “not at all” (score of                                       | Higher number indicates more severe depression (scores range between 0–27).                                                                                                                                                                                                                                                                                            |

|                    |                                                            |                                                                                                         |                                                                                                                                                                                                                                                                                                                                                                                                                                                                                        |
|--------------------|------------------------------------------------------------|---------------------------------------------------------------------------------------------------------|----------------------------------------------------------------------------------------------------------------------------------------------------------------------------------------------------------------------------------------------------------------------------------------------------------------------------------------------------------------------------------------------------------------------------------------------------------------------------------------|
|                    |                                                            | 0) to “nearly every day” (score of 3)                                                                   | <p>The total score is interpreted as follows:</p> <ul style="list-style-type: none"> <li>▪ 5–9: mild depression</li> <li>▪ 10–14: moderate</li> <li>▪ 15–19: moderately severe</li> <li>▪ 20–18: severe depression</li> </ul> <p>Split into dichotomous variables (<math>\leq 14</math> no depression and <math>&gt; 14</math> depression)</p>                                                                                                                                         |
| Insomnia           | Insomnia Severity Index (ISA)                              | <p>7-item</p> <p>5-point scale with “no problem” (score of 0) to “very severe problem” (score of 4)</p> | <p>Higher number indicates more severe insomnia (scores range between 0–28).</p> <p>The total score is interpreted as follows:</p> <ul style="list-style-type: none"> <li>▪ 0–7: not clinically significant</li> <li>▪ 8–14: subthreshold insomnia</li> <li>▪ 15–21: clinical insomnia (moderate severity)</li> <li>▪ 22–28: clinical insomnia (severe degree)</li> </ul> <p>Split into dichotomous variables (<math>\leq 14</math> no insomnia and <math>&gt; 15</math> insomnia)</p> |
| Hyperacusis        | Hyperacusis Questionnaire (HQ)                             | <p>14-items</p> <p>4-point scale with “no” (score of 0) to “yes, a lot” (score of 3)</p>                | <p>Higher number more severe hyperacusis (scores range between 0–42).</p> <p>The total score is interpreted as follows:</p> <ul style="list-style-type: none"> <li>▪ <math>&gt; 28</math>: strong hypersensitivity</li> </ul> <p>Split into dichotomous variables (<math>\leq 28</math> no hyperacusis and <math>&gt; 28</math> hyperacusis)</p>                                                                                                                                       |
| Hearing disability | Hearing Handicap Inventory for Adults – Screening (HHIA-S) | <p>10-items</p> <p>3-point scale with “yes” (score of 4) to “no” day (0)</p>                            | <p>Higher number more severe hearing disability (scores range between 0–40).</p> <p>The total score is interpreted as follows:</p> <ul style="list-style-type: none"> <li>▪ 0–8: no hearing disability</li> <li>▪ 10–24: mild to moderate hearing disability</li> <li>▪ 26–40: severe hearing disability</li> </ul> <p>Split into dichotomous variables (<math>\leq 8</math> no hearing disability and <math>\geq 10</math> hearing disability)</p>                                    |

|                    |                                        |                                                                                            |                                                                                                                                                                                                                                                                                                                                                                                                                                                                                                  |
|--------------------|----------------------------------------|--------------------------------------------------------------------------------------------|--------------------------------------------------------------------------------------------------------------------------------------------------------------------------------------------------------------------------------------------------------------------------------------------------------------------------------------------------------------------------------------------------------------------------------------------------------------------------------------------------|
| Cognitive failures | Cognitive Failures Questionnaire (CFQ) | 25-items<br><br>5-point scale with “never” (score of 0) to “very often” (score of 4)       | Higher scores indicate more difficulties (cognitive failures) in perception, memory, and motor function (score range 0–100).<br><br>The total score is interpreted as follows:<br>The scores range 0–100 with higher scores indicating more cognitive failures/problems (or reduced cognitive functioning).<br><br>Split into dichotomous variables (<=32 no cognitive problems and >32 cognitive problems)                                                                                      |
| Life satisfaction  | Satisfaction with Life Scale (SWLS)    | 5-items<br><br>7-point scale with “strongly disagree” (score of 1) to “strongly agree” (7) | Higher number indicated more satisfaction with life (scores range between 5–35).<br><br>The total score is interpreted as follows: <ul style="list-style-type: none"> <li>▪ 0–9: extremely dissatisfied</li> <li>▪ 10–14: dissatisfied</li> <li>▪ 15–19: below average satisfaction</li> <li>▪ 20–24: average satisfaction</li> <li>▪ 25–29: high satisfaction</li> <li>▪ 30–35: highly satisfied</li> </ul> Split into dichotomous variables (<=19 life satisfaction and >19 high satisfaction) |
