# Supplementary material for: Internet-based cognitive–behavioural therapy for tinnitus: secondary analysis to examine predictors of outcomes
Source: HighWire-hosted journal article supplement (doi:10.1136/bmjopen-2021-049384), 2021-08-01
Supplement: bmjopen-2021-049384supp003_data_supplement.pdf [file bmjopen-2021-049384supp003_data_supplement.pdf]

### Supplementary File 3: Univariate analysis to examine association between predictor variables and outcome variable

Table 1: Participant demographic characteristics (n=228)

| Characteristic                                                        | N (%)     | Mean (SD)     |
|-----------------------------------------------------------------------|-----------|---------------|
| <b>Demographic characteristics</b>                                    |           |               |
| Age (in years)                                                        |           | 55.14 (12.92) |
| Gender                                                                |           |               |
| ▪ Female                                                              | 98 (43%)  |               |
| ▪ Male                                                                | 130 (57%) |               |
| Highest level of education                                            |           |               |
| ▪ High school or below                                                | 59 (26%)  |               |
| ▪ College                                                             | 47 (21%)  |               |
| ▪ Vocational training                                                 | 31 (14%)  |               |
| ▪ Bachelor's degree                                                   | 61 (27%)  |               |
| ▪ Masters degree or above                                             | 30 (13%)  |               |
| Employment                                                            |           |               |
| ▪ Manager                                                             | 27 (12%)  |               |
| ▪ Professional                                                        | 46 (20%)  |               |
| ▪ Technical                                                           | 13 (6%)   |               |
| ▪ Administrative                                                      | 17 (7%)   |               |
| ▪ Skilled tradesman                                                   | 11 (5%)   |               |
| ▪ Service occupation                                                  | 11 (5%)   |               |
| ▪ Medical                                                             | 6 (3%)    |               |
| ▪ Sales                                                               | 8 (3%)    |               |
| ▪ Homemaker                                                           | 4 (2%)    |               |
| ▪ Student                                                             | 1 (0%)    |               |
| ▪ Retired                                                             | 73 (32%)  |               |
| ▪ Unemployed                                                          | 11 (5%)   |               |
| Loud noise exposure                                                   |           |               |
| ▪ Yes                                                                 | 103 (45%) |               |
| ▪ No                                                                  | 125 (55%) |               |
| Diagnosed with a psychological condition                              |           |               |
| ▪ Yes                                                                 | 50 (22%)  |               |
| ▪ No                                                                  | 178 (78%) |               |
| Working less due to tinnitus                                          |           |               |
| ▪ Reduced hours                                                       | 8 (4%)    |               |
| ▪ Stopped work                                                        | 32 (14%)  |               |
| ▪ Disability allowance                                                | 7 (3%)    |               |
| ▪ No                                                                  | 181 (79%) |               |
| <b>Tinnitus and hearing-related characteristics</b>                   |           |               |
| Baseline tinnitus severity (measured using Tinnitus Functional Index) |           | 57.93 (19.17) |
| Tinnitus duration (in years)                                          |           | 17.68 (19.42) |
| How often tinnitus is heard                                           |           |               |

|                                                                                                                                                                                                                                                                                 |                                                                                                    |  |
|---------------------------------------------------------------------------------------------------------------------------------------------------------------------------------------------------------------------------------------------------------------------------------|----------------------------------------------------------------------------------------------------|--|
| <ul style="list-style-type: none"> <li>▪ Occasionally</li> <li>▪ When taking out my hearing aid(s)</li> <li>▪ At night</li> <li>▪ Most of the time</li> <li>▪ All the time</li> </ul>                                                                                           | 4 (2%)<br>3 (1%)<br>4 (2%)<br>63 (27%)<br>154 (68%)                                                |  |
| Tinnitus location <ul style="list-style-type: none"> <li>▪ One ear</li> <li>▪ Both ears</li> <li>▪ In my head</li> <li>▪ Other location</li> <li>▪ Unsure</li> </ul>                                                                                                            | 61 (27%)<br>109 (48%)<br>34 (15%)<br>3 (1%)<br>21 (9%)                                             |  |
| Type of tinnitus sound (answering Yes) <ul style="list-style-type: none"> <li>▪ Ringing</li> <li>▪ Buzzing</li> <li>▪ High pitched sound</li> <li>▪ Low pitched sound</li> <li>▪ Pulsating</li> <li>▪ Clicking</li> <li>▪ Music</li> <li>▪ Voices</li> <li>▪ Humming</li> </ul> | 71 (31%)<br>75 (33%)<br>130 (57%)<br>16 (7%)<br>28 (12%)<br>14 (6%)<br>4 (2%)<br>3 (1%)<br>21 (9%) |  |
| Multiple sounds heard <ul style="list-style-type: none"> <li>▪ Yes</li> <li>▪ No</li> </ul>                                                                                                                                                                                     | 73 (32%)<br>155 (68%)                                                                              |  |
| Presence of a hearing loss <ul style="list-style-type: none"> <li>▪ No</li> <li>▪ Both ears</li> <li>▪ One ear</li> <li>▪ Unsure</li> </ul>                                                                                                                                     | 49 (21%)<br>104 (46%)<br>46 (20%)<br>29 (13%)                                                      |  |
| <b>Treatment-related characteristics</b>                                                                                                                                                                                                                                        |                                                                                                    |  |
| Past tinnitus treatment sought <ul style="list-style-type: none"> <li>▪ Yes</li> <li>▪ No</li> </ul>                                                                                                                                                                            | 58 (25%)<br>170 (75%)                                                                              |  |
| Sounds can distract from tinnitus <ul style="list-style-type: none"> <li>▪ Fully</li> <li>▪ Partially</li> <li>▪ Not at all</li> </ul>                                                                                                                                          | 26 (11%)<br>178 (78%)<br>24 (10%)                                                                  |  |
| Hearing aid use <ul style="list-style-type: none"> <li>▪ No</li> <li>▪ Unilateral</li> <li>▪ Bilateral</li> </ul>                                                                                                                                                               | 159 (70%)<br>19 (8%)<br>50 (22%)                                                                   |  |
| Medication use <ul style="list-style-type: none"> <li>▪ Yes</li> <li>▪ No</li> </ul>                                                                                                                                                                                            | 130 (57%)<br>98 (43%)                                                                              |  |

Table 2: Univariate analysis with the Chi-square/ Fishers exact test results on the association between the demographic predictor categories and outcome variable (success as defined by a TFI-score changes  $\geq 13$  points or a failure). \*Indicates use of Fisher's exact test results due to less than 5 cases in subcategories.

| Predictor variable                    | Sub-Categories                  | Crude Odds Ratio (95% CIs) | P-Value      |
|---------------------------------------|---------------------------------|----------------------------|--------------|
| Age                                   | >57 years                       | 0.85 (0.50, 1.47)          | 0.57         |
|                                       | $\leq 57$ years                 | Ref                        |              |
| Gender                                | Female                          | 1.12 (0.64, 1.94)          | 0.70         |
|                                       | Male                            | Ref                        |              |
| Education level                       | College                         | 0.61 (0.31, 1.42)          | <b>0.01*</b> |
|                                       | Vocational training             | 1.70 (0.75, 4.88)          |              |
|                                       | Bachelor's degree               | 1.30 (0.67, 2.92)          |              |
|                                       | <b>Master's degree or above</b> | <b>3.47 (1.32, 12.51)</b>  |              |
|                                       | High school or less             | Ref                        |              |
| Employment type                       | Professional                    | 0.59 (0.25, 1.82)          | 0.95*        |
|                                       | Technical                       | 0.40 (0.13, 1.89)          |              |
|                                       | Administrative                  | 0.40 (0.14, 1.66)          |              |
|                                       | Skilled tradesman               | 0.56 (0.18, 3.00)          |              |
|                                       | Service occupation              | 0.80 (0.24, 4.66)          |              |
|                                       | Medical                         | 1.00 (0.22, 11.54)         |              |
|                                       | Sales                           | 0.80 (0.21, 6.00)          |              |
|                                       | Home maker                      | 0.27 (0.06, 3.00)          |              |
|                                       | Student                         | 0.40 (0.05, 35.47)         |              |
|                                       | Retired                         | 0.74 (0.32, 2.12)          |              |
|                                       | Unemployed                      | 0.80 (0.24, 4.66)          |              |
|                                       | Manager                         | Ref                        |              |
| Loud noise exposure                   | Yes                             | 0.80 (0.46, 1.38)          | 0.43         |
|                                       | No                              | Ref                        |              |
| Presence of a psychological condition | Yes                             | 1.72 (0.85, 3.46)          | 0.13         |
|                                       | No                              | Ref                        |              |
| Work less due to tinnitus             | Reduced hours                   | 1.05 (0.31, 6.18)          | 0.89*        |
|                                       | Stopped work                    | 0.81 (0.41, 1.89)          |              |
|                                       | Disability allowance            | 0.53 (0.16, 2.88)          |              |
|                                       | No                              | Ref                        |              |

Table 3: Univariate analysis with the Chi-square/ Fishers exact test results on the association between the tinnitus and hearing-related predictor categories and outcome variable (success as defined by a TFI-score changes  $\geq 13$  points or a failure). \*Indicates use of Fisher's exact test results due to less than 5 cases in subcategories.

| Predictor variable          | Sub-Categories                    | Crude Odds Ratio (95% CIs) | P-Value      |
|-----------------------------|-----------------------------------|----------------------------|--------------|
| Baseline tinnitus severity  | >55.2                             | <b>2.65 (1.50, 4.67)</b>   | <b>0.001</b> |
|                             | $\leq 55.2$                       | Ref                        |              |
| Tinnitus duration           | >10.00 years                      | 1.16 (0.66, 2.02)          | 0.60         |
|                             | $\leq 10.00$ years                | Ref                        |              |
| How often tinnitus is heard | When taking out my hearing aid(s) | 0.67 (0.02, 18.06)         | 0.19*        |
|                             | At night                          | 0.33 (0.02, 6.65)          |              |
|                             | Most of the time                  | 0.39 (0.04, 3.96)          |              |
|                             | All the time                      | 0.76 (0.08, 7.49)          |              |
|                             | Occasionally                      | Ref                        |              |
| Tinnitus location           | Both ears                         | 1.41(0.48, 4.16)           | 0.90*        |
|                             | In my head                        | 0.94 (0.48, 1.80)          |              |
|                             | Unsure                            | 1.35 (0.55, 3.34)          |              |
|                             | Other                             | 1.13 (0.10,13.16)          |              |
|                             | One ear                           | Ref                        |              |
| Tinnitus type: Ringing      | Yes                               | 1.30 (0.72, 2.37)          | 0.38         |
|                             | No                                | Ref                        |              |
| Tinnitus type: Buzzing      | Yes                               | 1.34 (0.74, 2.42)          | 0.32         |
|                             | No                                | Ref                        |              |
| Tinnitus type: High pitch   | Yes                               | 0.76 (0.44, 1.33)          | 0.34         |
|                             | No                                | Ref                        |              |
| Tinnitus type: Low pitch    | Yes                               | 0.89 (0.31, 2.56)          | 0.83         |
|                             | No                                | Ref                        |              |
| Tinnitus type: Pulsing      | Yes                               | 0.97 (0.42, 2.21)          | 0.94         |
|                             | No                                | Ref                        |              |
| Tinnitus type: Clicking     | Yes                               | 0.52 (0.17, 1.53)          | 0.23         |
|                             | No                                | Ref                        |              |
| Tinnitus type: Music        | Yes                               | 1.63 (0.17, 15.98)         | 1.00*        |
|                             | No                                | Ref                        |              |
| Tinnitus type: Voices       | Yes                               | 0.09 (0.00, 1.75)          | 0.04*        |
|                             | No                                | Ref                        |              |
| Tinnitus type: Humming      | Yes                               | 0.56 (0.23, 1.39)          | 0.21         |
|                             | No                                | Ref                        |              |
| Multiple tones heard        | Yes                               | 1.15 (0.64, 2.08)          | 0.63         |
|                             | No                                | Ref                        |              |
| Presence of a hearing loss  | Both ears                         | 1.20 (0.59, 2.41)          | 0.92         |
|                             | One ear                           | 1.19 (0.51, 2.74)          |              |
|                             | Unsure                            | 1.41 (0.53, 3.73)          |              |
|                             | No                                | Ref                        |              |

Table 4: Univariate analysis with the Chi-square/ Fishers exact test results on the association between the treatment-related predictor categories and outcome variable (success as defined by a TFI-score changes  $\geq 13$  points or a failure). \*Indicates use of Fisher's exact test results due to less than 5 cases in subcategories.

| Predictor variable    | Sub-Categories | Crude Odds Ratio (95% CIs) | P-Value      |
|-----------------------|----------------|----------------------------|--------------|
| Past treatment sought | Yes            | 0.94 (0.50, 1.74)          | 0.83         |
|                       | No             | Ref                        |              |
| Sounds can distract   | Partially      | <b>4.34 (1.82, 10.34)</b>  | <b>0.001</b> |
|                       | Not at all     | <b>3.15 (0.99, 10.00)</b>  |              |
|                       | Fully          | Ref                        |              |
| Hearing aid use       | One ear        | <b>1.57 (0.61, 5.49)</b>   | <b>0.26</b>  |
|                       | Both ear       | 0.69 (0.38, 1.39)          |              |
|                       | No             | Ref                        |              |
| Medication use        | Yes            | 1.22 (0.71, 2.12)          | 0.46         |
|                       | No             | Ref                        |              |

Table 5: Univariate analysis with the Chi-square/ Fishers exact test results on the association between the clinical factors predictor categories and outcome variable (success as defined by a TFI-score changes  $\geq 13$  points or a failure). \*Indicates use of Fisher's exact test results due to less than 5 cases in subcategories.

| Predictor variable  | Sub-Categories | Odds Ratio (95% CIs) | P-Value |
|---------------------|----------------|----------------------|---------|
| Anxiety             | Yes            | 1.53 (0.83, 2.82)    | 0.17    |
|                     | No             | Ref                  |         |
| Depression          | Yes            | 1.54 (0.62, 3.83)    | 0.35    |
|                     | No             | Ref                  |         |
| Insomnia            | Yes            | 1.27 (0.72, 2.23)    | 0.41    |
|                     | No             | Ref                  |         |
| Hyperacusis         | Yes            | 1.21 (0.56, 2.63)    | 0.62    |
|                     | No             | Ref                  |         |
| Hearing disability  | Yes            | 1.37 (0.77, 2.43)    | 0.28    |
|                     | No             | Ref                  |         |
| Cognitive functions | Yes            | 0.99 (0.56, 1.74)    | 0.97    |
|                     | No             | Ref                  |         |
| Life satisfaction   | Yes            | 0.76 (0.44, 1.33)    | 0.34    |
|                     | No             | Ref                  |         |
